# Supplementary material for: Construction of 4-hydroxycoumarin derivatives with adjacent quaternary and tertiary stereocenters via ternary catalysis
Source: Royal Society of Chemistry journal article supplement (doi:10.1039/d3sc03452f), 2023-01-01

## Supporting Information

### Construction of 4-hydroxycoumarin derivatives with adjacent quaternary and tertiary stereocenters *via* ternary catalysis

Mengchu Zhang<sup>a</sup>, Tianyuan Zhang<sup>a</sup>, Sifan Yu<sup>a</sup>, Huang Qiu<sup>a</sup>, Abdulla Yusuf<sup>b</sup>, Xinfang Xu<sup>a</sup>, Yu Qian<sup>\*a</sup>, and Wenhao Hu<sup>\*a</sup>

<sup>a</sup> School of Pharmaceutical Sciences, Sun Yat-sen University, Guangzhou 510006, China.

<sup>b</sup> College of Chemistry and Environmental Science, Laboratory of Xinjiang Native Medicinal and Edible Plant Resources Chemistry, Kashi University, Kashi 844000, China.

- E-mail: [qianyu5@mail.sysu.edu.cn](mailto:qianyu5@mail.sysu.edu.cn); [huwh9@mail.sysu.edu.cn](mailto:huwh9@mail.sysu.edu.cn)

### Contents

|                                                                                           |    |
|-------------------------------------------------------------------------------------------|----|
| 1. General information .....                                                              | 2  |
| 2. Experimental procedures .....                                                          | 2  |
| 2.1 General procedure for synthesis of diazoacetamides .....                              | 2  |
| 2.2 General procedure for synthesis of substituted 4-hydroxycoumarins .....               | 3  |
| 2.3 General procedure for synthesis of substituted alkynaldehydes .....                   | 3  |
| 2.4 General procedure for the three-component reaction .....                              | 4  |
| 2.4.1 Asymmetric attempt of the three-component reaction under the catalysis of CPA ..... | 5  |
| 2.5 General procedure for the four-component reaction .....                               | 6  |
| 2.6 General procedure for scale up .....                                                  | 6  |
| 2.7 General procedure for synthesis of <b>8</b> .....                                     | 7  |
| 3. Control experiments .....                                                              | 7  |
| 4. General Procedure for the <i>in vitro</i> Anti-tumor Activity Study .....              | 11 |
| 5. References .....                                                                       | 12 |
| 7. Single crystal X-ray diffraction data .....                                            | 13 |
| 8. Analytical data of products .....                                                      | 17 |
| 9. NMR spectra of products .....                                                          | 34 |

## 1. General information

**General:** All  $^1\text{H}$  NMR (400 MHz, 500 MHz) and  $^{13}\text{C}$  NMR (100 MHz or 125 MHz) and  $^{19}\text{F}$  NMR (376 MHz, 471 MHz) spectra were recorded on 400 MHz or 500 MHz Bruker spectrometers in  $\text{CDCl}_3$ ; chemical shifts were reported in ppm with the solvent signal as reference, and coupling constants ( $J$ ) were given in Hertz. The peak information was described as: s = singlet, d = doublet, t = triplet, q = quartet, m = multiplet, br = broad. High-resolution mass spectrometry (HRMS) data were collected on Waters Micromass Q-TOF micro Synapt High Definition Mass Spectrometer. Low-resolution mass spectrometry (LRMS) data were collected on Waters SQD2 with Waters H-Class UPLC. Single crystal X-ray diffraction data (**4af**, **7a**, **8**) were recorded on Bruker-AXS SMART APEX II single crystal X-ray diffractometer. Yields for all compounds were isolated yields for all isomers.

## 2. Experimental procedures

### 2.1 General procedure for synthesis of diazoacetamides

Diazoacetamides **1a-i** were known products and prepared according to the following procedures.

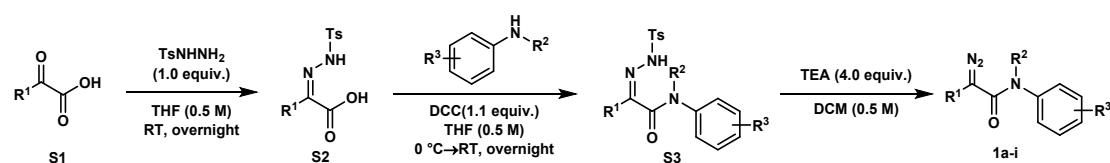

Keto acid **S1** (1.0 equiv.) and 4-methylbenzenesulfonylhydrazide (1.0 equiv.) were uniformly dispersed in THF (0.5 M) under stirring condition at room temperature overnight. After completion, the suspension was concentrated under reduced pressure and the crude was recrystallized from a mixture of Petroleum ether/EtOAc during 12 hours at room temperature. The desired product **S2** was collected by filtration, washed with PE, and dried under high vacuum.

To a stirred solution of  $N$ -substituted aniline (1.0 equiv.) and acid **S2** (1.2 equiv.) in THF (0.5 M), DCC (1.1 equiv.) was added slowly at  $0\text{ }^\circ\text{C}$ . The mixture was warmed to room temperature and stirred overnight. While TLC analysis showed completion of the reaction, the mixture was filtered to separate the generated salt. Then, the liquid residue was concentrated in vacuo to give the crude **S3** without further purification.

To a suspension of crude **S3** (1.0 equiv.) in DCM (0.5 M) stirred at room temperature, TEA (4.0 equiv.) was added and the mixture was stirred for additional 5 hrs, when TLC analysis showed completion of the reaction. Then, the mixture was concentrated under reduced pressure. The residue was purified by preparative column chromatography (silica gel, eluted with EtOAc: Petroleum ether

= 1:50-1:15, note: 3% Et<sub>3</sub>N was added in the eluent) to obtain diazoacetamides **1a-i**.

## 2.2 General procedure for synthesis of substituted 4-hydroxycoumarins

Substituted 4-hydroxycoumarins **2a-d**, **2f-h** were commercial products and bought from Bidepharm company. Substituted 4-hydroxycoumarin **2e** was known product and prepared using the following procedure<sup>[1]</sup>.

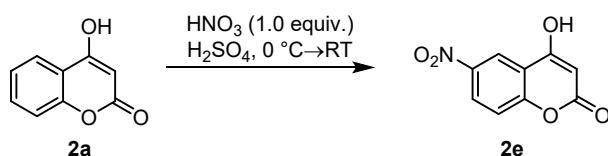

To a suspension of 4-hydroxy-2H-chromen-2-one **2a** (1.0 g, 6.2 mmol) in concentrated H<sub>2</sub>SO<sub>4</sub> (4 mL) was added concentrated HNO<sub>3</sub> (0.4 mL, 1.0 equiv.) in one portion under an ice bath. The mixture was stirred for another 1h at room temperature and then carefully poured into cold water (30 mL). The crude product was extracted with EtOAc (30 mL × 2) and the combined organic layer was washed with water (30 mL × 2), brine, dried over anhydrous Na<sub>2</sub>SO<sub>4</sub> and concentrated under vacuum. The residue was purified by column chromatography on silica gel (petroleum ether/ethyl acetate = 4/1) to provide **2e** as a white solid.

## 2.3 General procedure for synthesis of substituted alkynaldehydes

Substituted alkynaldehydes **3a** and **3k** were commercial products and bought from Bidepharm company. Other substituted alkynaldehydes **3b-j** were known products and prepared according to the literature procedures<sup>[2]</sup>.

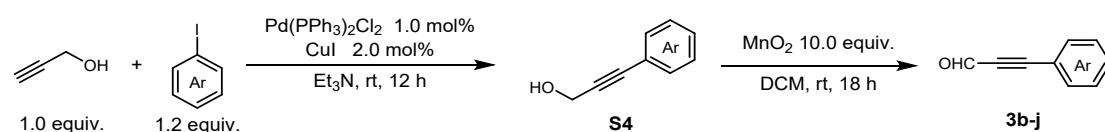

To a solution of iodoarene (1.2 equiv.) in trimethylamine (0.34 M) was added Pd(PPh<sub>3</sub>)<sub>2</sub>Cl<sub>2</sub> (1.0 mol %) and CuI (2.0 mol %). The reaction was stirred for 5 min before the addition of propargyl alcohol (1.0 equiv.). The resulting mixture was stirred for 12 h. After TLC analysis showed completion of the reaction, the mixture was quenched with saturated NaHCO<sub>3</sub>(aq) and extracted with ethyl acetate (3 × 20 mL). The combined organic layer was washed with saturated brine, dried over anhydrous MgSO<sub>4</sub>, filtered and concentrated. The crude product was purified by column chromatography (petroleum ether/EtOAc, 10:1 – 3:1) to give **S4**.

Manganese (IV) oxide (10.0 equiv.) was added to a stirred solution of corresponding propargyl

alcohol **S4** (1.0 equiv.) in DCM (0.25 M). The mixture was stirred at room temperature for 18 h, then filtered through silica gel and concentrated in vacuo. The residue was purified by column chromatography on silica gel (petroleum ether/EtOAc, 10:1) to afford the desired product **3b-j**.

## 2.4 General procedure for the three-component reaction

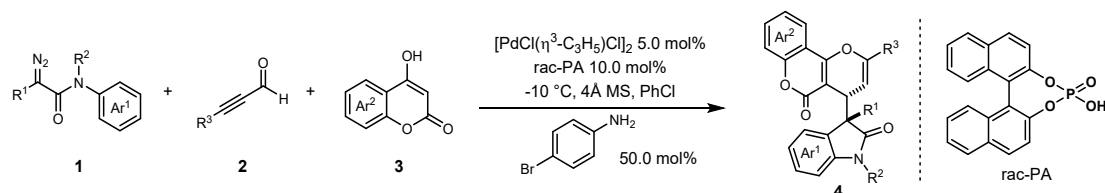

**Condition A:** To an oven-dried test tube with a stirring bar were added substituted 4-hydroxycoumarins **3** (0.10 mmol, 1.0 equiv.),  $[\text{PdCl}(\eta^3\text{-C}_3\text{H}_5)\text{Cl}]_2$  (1.8 mg, 5.0 mol%), rac-PA (3.5 mg, 10.0 mol%), 4-bromoaniline (0.05 mmol, 50.0 mol%), 4Å MS (50 mg) and anhydrous PhCl (1.0 mL), and this suspension was later stirred at -10 °C. Then diazoacetamides **1** (0.15 mmol, 1.5 equiv.) and substituted alkynaldehydes **2** (0.12 mmol, 1.2 equiv.) dissolved in anhydrous PhCl (1.0 mL) were injected into the suspension over 1h *via* a syringe pump. After completion of the addition, stirring was continued at -10 °C for 8h. Then the mixture was filtered and concentrated under vacuum to give a residue which was subjected to  $^1\text{H}$  NMR spectroscopy analysis for the determination of diastereoselectivity (*dr* value). Careful purification of the crude product by flash chromatography on silica gel (eluent: petroleum ether/EtOAc = 10/1~3/1) afforded pure products.

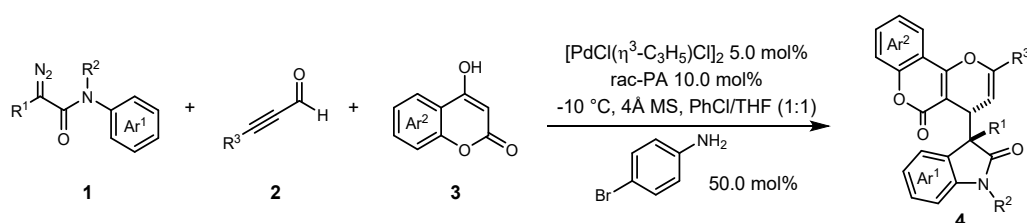

**Condition B:** To an oven-dried test tube with a stirring bar were added substituted 4-hydroxycoumarins **3** (0.10 mmol, 1.0 equiv.),  $[\text{PdCl}(\eta^3\text{-C}_3\text{H}_5)\text{Cl}]_2$  (1.8 mg, 5.0 mol%), rac-PA (3.5 mg, 10.0 mol%), 4-bromoaniline (0.05 mmol, 50.0 mol%), 4Å MS (50 mg) and anhydrous THF (1.0 mL), and this suspension was later stirred at -10 °C. Then diazoacetamides **1** (0.15 mmol, 1.5 equiv.) and substituted alkynaldehydes **2** (0.12 mmol, 1.2 equiv.) dissolved in anhydrous PhCl (1.0 mL) were injected into the suspension over 1h *via* a syringe pump. After completion of the addition, stirring was continued at -10 °C for 8h. Then the mixture was filtered and concentrated under vacuum to give a residue which was subjected to  $^1\text{H}$  NMR spectroscopy analysis for the determination of diastereoselectivity (*dr* value). Careful purification of the crude product by flash chromatography on silica gel (eluent: petroleum ether/EtOAc = 10/1~3/1) afforded pure products.

## 2.4.1 Asymmetric attempt of the three-component reaction under the catalysis of CPA

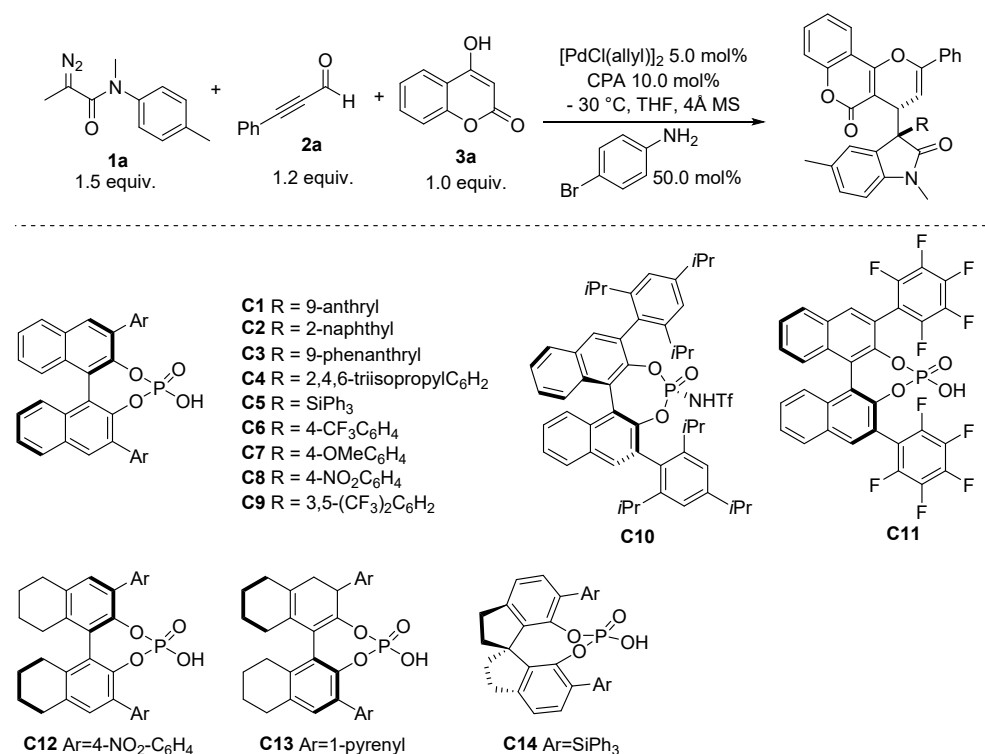

| entry | CPA        | yield% | <i>dr</i> | <i>ee%</i> (major) |
|-------|------------|--------|-----------|--------------------|
| 1     | <b>C1</b>  | 14     | 56:44     | 8                  |
| 2     | <b>C2</b>  | 20     | 74:26     | 4                  |
| 3     | <b>C3</b>  | 14     | 58:42     | 8                  |
| 4     | <b>C4</b>  | 15     | 67:33     | 0                  |
| 5     | <b>C5</b>  | 17     | 71:29     | 0                  |
| 6     | <b>C6</b>  | 16     | 77:23     | 4                  |
| 7     | <b>C7</b>  | 21     | 71:29     | 0                  |
| 8     | <b>C8</b>  | 30     | 75:25     | 8                  |
| 9     | <b>C9</b>  | 48     | 78:22     | 0                  |
| 10    | <b>C10</b> | 61     | 77:23     | 0                  |
| 11    | <b>C11</b> | 39     | 85:15     | 0                  |
| 12    | <b>C12</b> | 47     | 74:26     | 0                  |
| 13    | <b>C13</b> | 49     | 52:48     | 0                  |
| 14    | <b>C14</b> | 42     | 85:15     | 0                  |

The reactions were conducted on a 0.05 mmol scale: **1a**:**2a**:**3a** = 1.5:1.2:1.0, [PdCl( $\eta^3$ -C<sub>3</sub>H<sub>5</sub>)<sub>2</sub>] (5.0 mol%), CPA (10 mol%), 4-BrC<sub>6</sub>H<sub>4</sub>NH<sub>2</sub> (50 mol%), 4Å MS (50 mg). **1a**, **2a** in 1.0 mL THF were added into a solution of **3a**, [PdCl( $\eta^3$ -C<sub>3</sub>H<sub>5</sub>)<sub>2</sub>], CPA, 4-BrC<sub>6</sub>H<sub>4</sub>NH<sub>2</sub>, and 50 mg 4Å MS in 1.0

mL THF *via* a syringe pump for 1 h, and the resulting mixture was stirred overnight. The yields were determined by  $^1\text{H}$  NMR spectroscopy analyses using 1, 3, 5-trimethoxybenzene as an internal standard. *dr* values were determined through  $^1\text{H}$  NMR spectroscopy analyses, *ee* values were determined through HPLC analysis on a chiral stationary phase.

## 2.5 General procedure for the four-component reaction

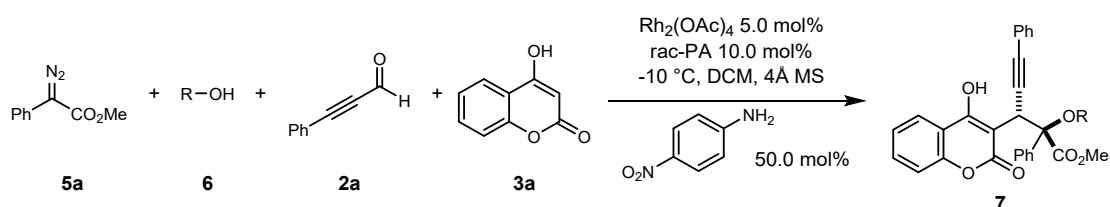

To an oven-dried test tube with a stirring bar were added substituted alcohols **6** (0.60 mmol, 3.0 equiv.), 4-hydroxycoumarin **3a** (0.20 mmol, 1.0 equiv.),  $\text{Rh}_2(\text{OAc})_4$  (4.4 mg, 5.0 mol%), *rac*-PA (7.0 mg, 10.0 mol%), 4-nitroaniline (0.10 mmol, 50.0 mol%), 4Å MS (100 mg) and anhydrous DCM (2.0 mL), and this suspension was later stirred at  $-10\text{ }^\circ\text{C}$ . Then diazoacetates **5a** (0.30 mmol, 1.5 equiv.) and phenylpropionaldehyde **2a** (0.60 mmol, 3.0 equiv.) dissolved in anhydrous DCM (2.0 mL) were injected into the suspension over 1h *via* a syringe pump. After completion of the addition, stirring was continued at  $-10\text{ }^\circ\text{C}$  for 2h. Then the mixture was filtered and concentrated under vacuum to give a residue which was subjected to  $^1\text{H}$  NMR spectroscopy analysis for the determination of diastereoselectivity (*dr* value). Careful purification of the crude product by flash chromatography on silica gel (eluent: petroleum ether/EtOAc = 10/1~3/1) afforded pure products.

## 2.6 General procedure for scale up

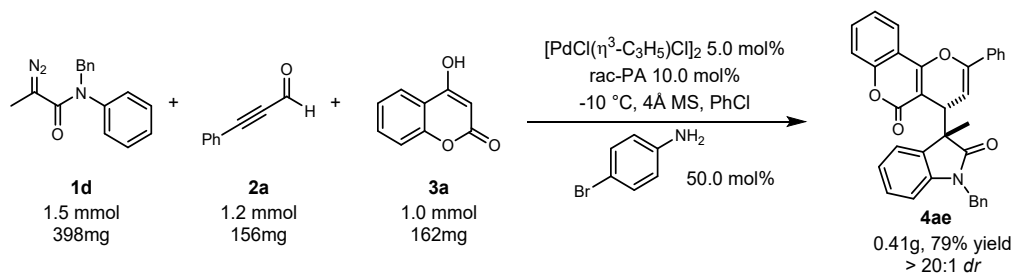

To an oven-dried test tube with a stirring bar were added 4-hydroxycoumarins **3a** (1.0 mmol, 1.0 equiv.),  $[\text{PdCl}(\eta^3\text{-C}_3\text{H}_5)\text{Cl}]_2$  (18 mg, 5.0 mol%), *rac*-PA (35 mg, 10.0 mol%), 4-bromoaniline (0.05 mmol, 50.0 mol%), 4Å MS (500 mg) and anhydrous PhCl (10 mL), and this suspension was later stirred at  $-10\text{ }^\circ\text{C}$ . Then *N*-benzyl-2-diazo-*N*-phenylpropanamide **1d** (1.5 mmol, 1.5 equiv.) and 3-phenylpropionaldehyde **2a** (1.2 mmol, 1.2 equiv.) dissolved in anhydrous PhCl (10 mL) were injected into the suspension over 1h *via* a syringe pump. After completion of the addition, stirring was continued at  $-10\text{ }^\circ\text{C}$  for 8h. Then the mixture was filtered and concentrated under vacuum to give a residue which was subjected to  $^1\text{H}$  NMR spectroscopy analysis for the determination of diastereoselectivity (*dr* value). Careful purification of the crude product by flash chromatography on silica gel (eluent: petroleum ether/EtOAc = 10/1~3/1) afforded 0.41g pure product **4ae** in 79% yield

with > 20:1 *dr*.

## 2.7 General procedure for synthesis of **8**

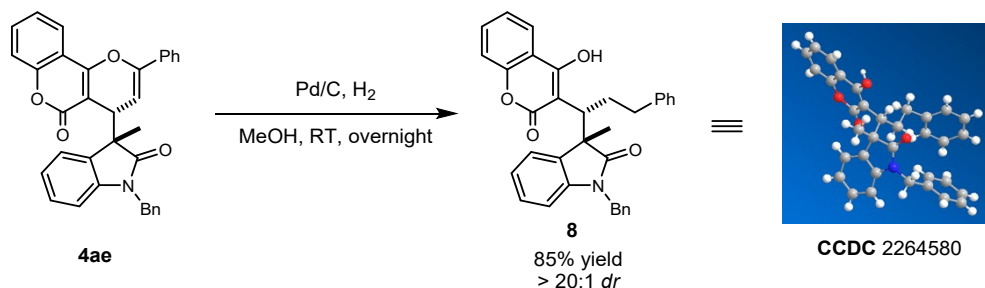

Following a modified procedure reported in the supporting information of Gong<sup>[3]</sup>. To a 25-mL oven-dried round-bottom flask containing a magnetic stirring bar, **4ae** (102.2 mg, 0.2 mmol) in 5 mL of MeOH, was added wet 10% Pd/C (38 mg, 40 mol %). The heterogeneous mixture was placed under 40-60 psi H<sub>2</sub> atmosphere and stirred overnight at room temperature. After the hydrogenolysis was complete, as indicated by TLC analysis, the mixture was then filtered through a pad of Celite to remove Pd/C, and the solid was washed with MeOH. The combined filtrate was concentrated under vacuum, and the residue was purified by silica chromatography column (eluent: Petroleum ether/EtOAc = 10:1 to 3:1) to give 87.6 mg of pure product **8** as white solid, 85% yield, > 20:1 *dr*.

## 3. Control experiments

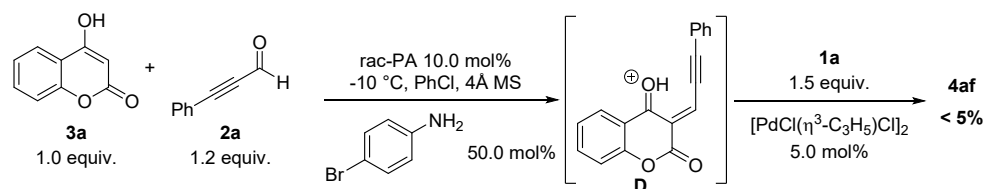

To a 10 mL oven-dried test tube equipped with a magnetic stirring bar were added 4-hydroxycoumarin **3a** (0.10 mmol, 1.0 equiv.), phenylpropionaldehyde **2a** (0.12 mmol, 1.2 equiv.), rac-PA (3.5 mg, 10.0 mol%), 4-bromoaniline (0.05 mmol, 50.0 mol%), 4Å MS (50 mg) and anhydrous PhCl (1.0 mL). This suspension was firstly stirred at RT for 0.5h and later moved into -10 °C low-temperature reactor for another 0.5h. Then, [PdCl(η<sup>3</sup>-C<sub>3</sub>H<sub>5</sub>)Cl]<sub>2</sub> (1.8 mg, 5.0 mol%) was added and diazoacetamides **1a** (0.15 mmol, 1.5 equiv.) dissolved in anhydrous PhCl (1.0 mL) were injected into the above suspension over 1h *via* a syringe pump. The resulting mixture was stirred at -10 °C until the diazo compound decomposed completely. TLC analysis showed that no desired product **4af** was produced and most of the diazo compound was converted into the C-H insertion product **11**.

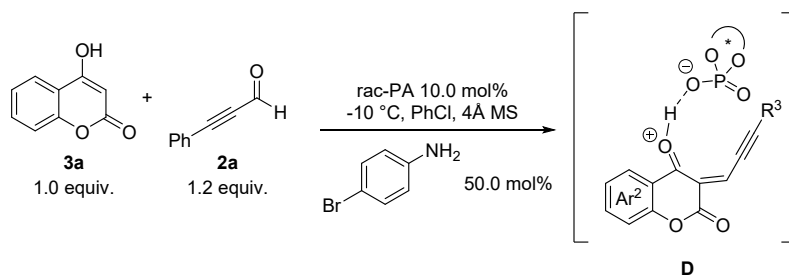

To a 10 mL oven-dried test tube equipped with a magnetic stirring bar were added 4-hydroxycoumarin **3a** (0.10 mmol, 1.0 equiv.), phenylpropionaldehyde **2a** (0.12 mmol, 1.2 equiv.), rac-PA (3.5 mg, 10.0 mol%), 4-bromoaniline (0.05 mmol, 50.0 mol%), 4Å MS (50 mg) and anhydrous PhCl (1.0 mL). This suspension was stirred at -10 °C for 0.5h. Then, the reaction mixture was sent to test ESI-HRMS quickly and the result was showed below.

**HRMS-ESI** of Intermediate **D**: calcd. for C<sub>18</sub>H<sub>11</sub>O<sub>3</sub> [M+H]<sup>+</sup> : 275.0703; found: 275.0714.

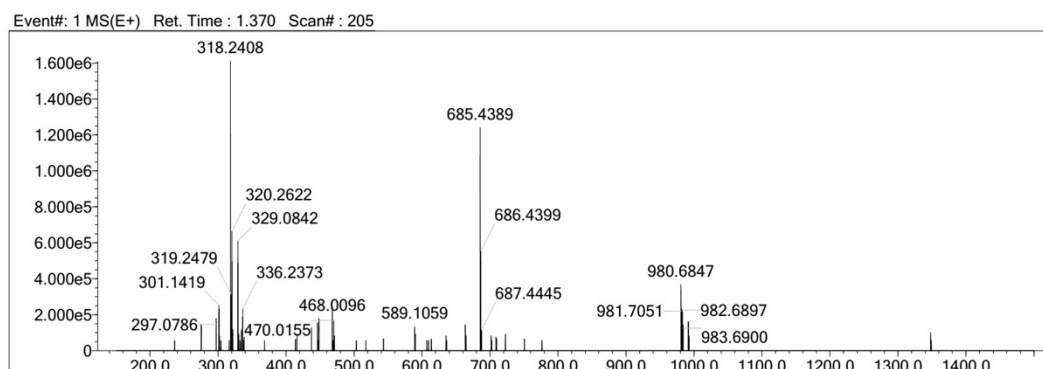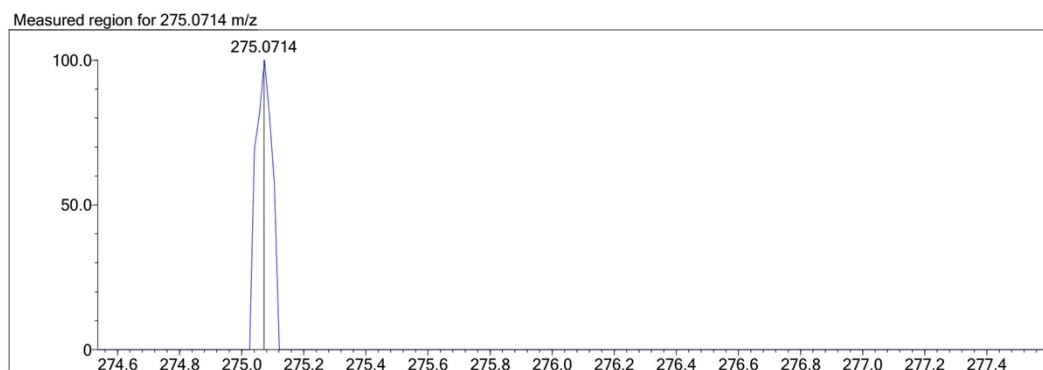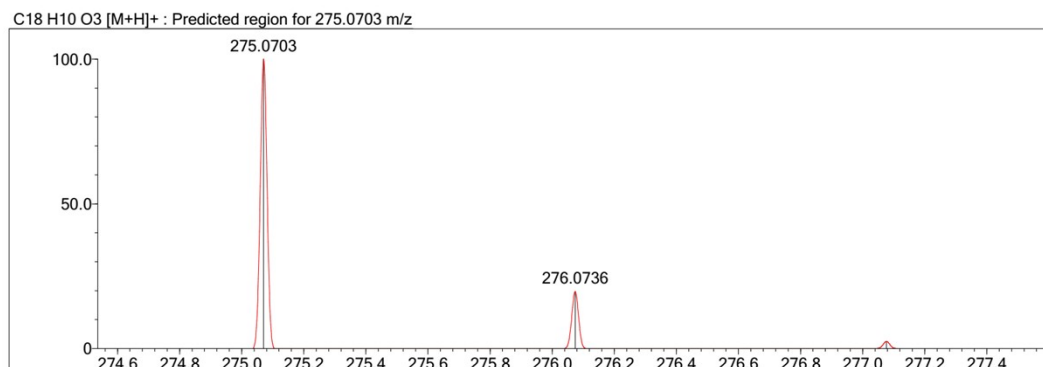

| Rank | Score | Formula (M) | Ion                | Meas. m/z | Pred. m/z | Df. (mDa) | Df. (ppm) | Iso  | DBE  |
|------|-------|-------------|--------------------|-----------|-----------|-----------|-----------|------|------|
| 1    | 0.00  | C18 H10 O3  | [M+H] <sup>+</sup> | 275.0714  | 275.0703  | 1.1       | 4.00      | 0.00 | 14.0 |



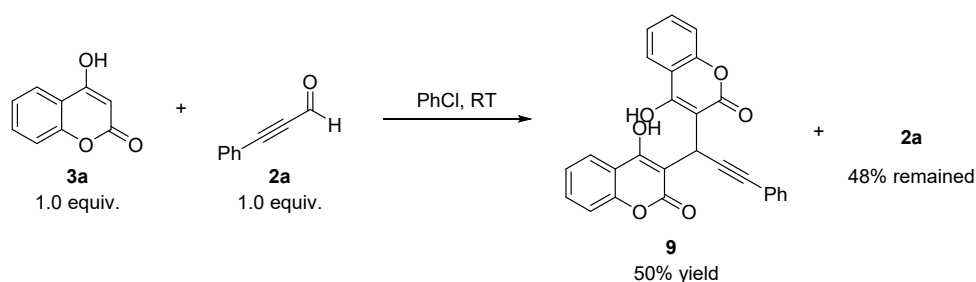

To a 10 mL oven-dried test tube equipped with a magnetic stirring bar were added 4-hydroxycoumarin **3a** (0.10 mmol, 1.0 equiv.), phenylpropiolaldehyde **2a** (0.12 mmol, 1.2 equiv.), and anhydrous PhCl (1.0 mL). This suspension was stirred at RT until the 4-hydroxycoumarin **3a** was consumed completely. Then, the reaction solvent PhCl was removed under vacuo and the crude reaction mixtures above were recorded with  $^1\text{H}$  NMR spectra, showing that **9** was obtained in 50% yield and **2a** was remained of 48%.

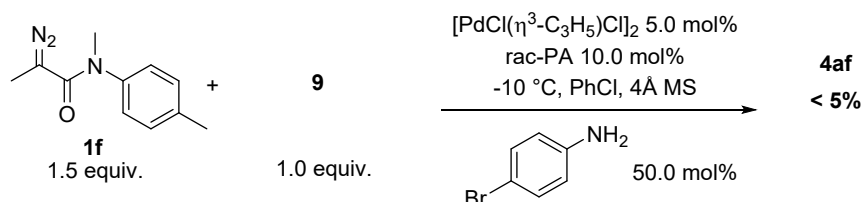

To a 10 mL oven-dried test tube equipped with a magnetic stirring bar were added the adduct **9** (0.10 mmol, 1.0 equiv.),  $[\text{PdCl}(\eta^3\text{-C}_3\text{H}_5)\text{Cl}]_2$  (1.8 mg, 5.0 mol%), rac-PA (3.5 mg, 10.0 mol%), 4-bromoaniline (0.05 mmol, 50.0 mol%), 4Å MS (50 mg) and anhydrous PhCl (1.0 mL), and this suspension was later stirred at  $-10^\circ\text{C}$ . Then diazoacetamides **1a** (0.15 mmol, 1.5 equiv.) dissolved in anhydrous PhCl (1.0 mL) was injected into the suspension over 1h *via* a syringe pump. After completion of the addition, stirring was continued at  $-10^\circ\text{C}$  for 8h. TLC analysis and crude  $^1\text{H}$  NMR showed that no desired product **4af** was detected and only the C-H insertion product **5** derived from diazoacetamides **1a** occurred.

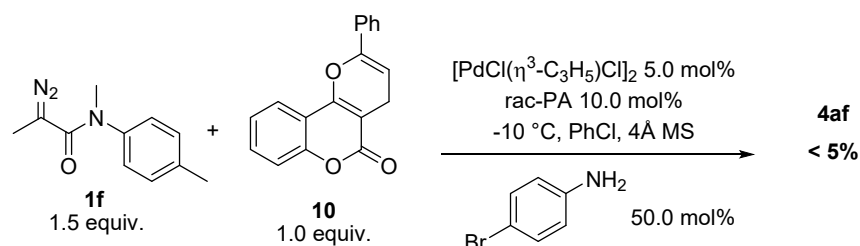

To a 10 mL oven-dried test tube equipped with a magnetic stirring bar were added the adduct **10** (0.10 mmol, 1.0 equiv.),  $[\text{PdCl}(\eta^3\text{-C}_3\text{H}_5)\text{Cl}]_2$  (1.8 mg, 5.0 mol%), rac-PA (3.5 mg, 10.0 mol%), 4-bromoaniline (0.05 mmol, 50.0 mol%), 4Å MS (50 mg) and anhydrous PhCl (1.0 mL), and this suspension was later stirred at  $-10^\circ\text{C}$ . Then diazoacetamides **1a** (0.15 mmol, 1.5 equiv.) dissolved in anhydrous PhCl (1.0 mL) was injected into the suspension over 1h *via* a syringe pump. After completion of the addition, stirring was continued at  $-10^\circ\text{C}$  for 8h. TLC analysis and crude  $^1\text{H}$  NMR showed that no desired product **4af** was detected and only the C-H insertion product **5** derived from diazoacetamides **1a** occurred.

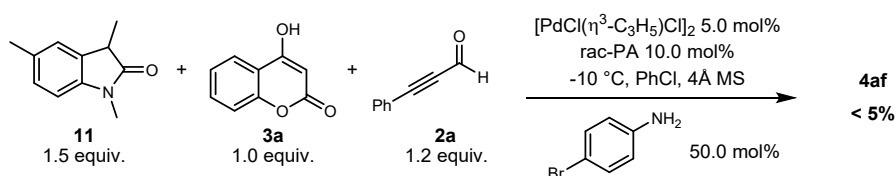

To a 10 mL oven-dried test tube equipped with a magnetic stirring bar were added 4-hydroxycoumarin **3a** (0.10 mmol, 1.0 equiv.),  $[\text{PdCl}(\eta^3\text{-C}_3\text{H}_5)\text{Cl}]_2$  (1.8 mg, 5.0 mol%), rac-PA (3.5 mg, 10.0 mol%), 4-bromoaniline (0.05 mmol, 50.0 mol%), 4Å MS (50 mg) and anhydrous PhCl (1.0 mL), and this suspension was later stirred at -10 °C. Then the C-H insertion product **11** derived from diazoacetamides **1a** (0.15 mmol, 1.5 equiv.) and phenylpropionaldehyde **2a** (0.12 mmol, 1.2 equiv.) dissolved in anhydrous PhCl (1.0 mL) were injected into the suspension over 1h *via* a syringe pump. After completion of the addition, stirring was continued at -10 °C for 8h. TLC analysis and crude  $^1\text{H}$  NMR showed that most of the material **11** remained intact and no desired product **4af** was detected.

## 4. General Procedure for the *in vitro* Anti-tumor Activity Study

### Cell viability was measured by CCK-8 assay

Human cancer cell line HCT116 was obtained from Cell Cook. Cells were cultured in RPMI1640 medium containing 10% fetal bovine serum and 1% penicillin/streptomycin (Gibco) in a humidified incubator containing 5% CO<sub>2</sub> at 37 °C. Human cancer cell lines MCF-7 was obtained from Procell and cells were cultured in MEM medium containing 10% fetal bovine serum, 1% penicillin/streptomycin (Gibco) and 0.01 mg/mL insulin (Procell) in a humidified incubator containing 5% CO<sub>2</sub> at 37 °C. For cell viability, cells were seeded in 96-well plates at 5000 cells per well. After 24 hours, serially diluted compounds were added and cells were cultured for another 48 hours. Cell viability was measured using a Cell Counting Kit-8 (CCK-8) assay according to the manufacturer's instructions (Yeasen Biotechnology, China).

These representative products **4ab**, **4ae**, **4af**, **4bc**, **4be**, **4cc**, **4cd**, and **4cf** on cell viability was evaluated *via* CCK8 assay in HCT116 (colon cancer), MCF-7 (breast cancer) and SJSA-1 (osteosarcoma) human cancer cell lines, and the *in vitro* anti-tumor activity results have been listed in **Table S1**.

**Table S1.** Anti-tumor Activity Study of Compounds **4ab**, **4ae**, **4af**, **4bc**, **4be**, **4cc**, **4cd**, and **4cf** (Inhibitory rate at 20 μM)

| Compound   | Cancer cell line                                    |                |                |
|------------|-----------------------------------------------------|----------------|----------------|
|            | HCT-116                                             | MCF-7          | SJSA-1         |
|            | Inhibition (%)                                      | Inhibition (%) | Inhibition (%) |
| <b>4ab</b> | 90.33 ± 0.98<br>IC <sub>50</sub> : 9.988 ± 0.590 μM | 64.87 ± 1.35   | 79.1 ± 2.47    |
| <b>4ae</b> | 15.32 ± 4.33                                        | 31.21 ± 2.48   | 78.14 ± 2.11   |
| <b>4af</b> | 91.84 ± 0.04<br>IC <sub>50</sub> : 10.71 ± 1.273 μM | 70.01 ± 2.31   | 67.42 ± 1.8    |
| <b>4bc</b> | 36.6 ± 6.14                                         | 78.38 ± 1.46   | 30.56 ± 1.94   |
| <b>4be</b> | <1                                                  | 57.98 ± 2.54   | 89.23 ± 0.28   |
| <b>4cc</b> | 5.68 ± 3.22                                         | 61.27 ± 2.39   | 45.99 ± 6.38   |
| <b>4cd</b> | 41.55 ± 4.21                                        | 54.44 ± 3.98   | 23.88 ± 3.01   |
| <b>4cg</b> | 42.47 ± 4.01                                        | 80.35 ± 0.43   | 32.6 ± 4.36    |

## 5. References

- [1] X. Feng, Z. Qin, X. Cheng, D. Liu, Y. Peng, H. Huang, B. Song, J. Bian and Z. Li, *J Org Chem.* **2021**, *86*, 12537-12548.
- [2] a) N. Cabrera-Lobera, M. T. Quiros, W. W. Brennessel, M. L. Neidig, E. Bunuel and D. J. Cardenas, *Org Lett.* **2019**, *21*, 6552-6556; b) Ź. A. Ignatiuk, M. J. Janicki, R. W. Góra, K. Konieczny and R. Kowalczyk, *Advanced Synthesis & Catalysis.* **2019**, *361*, 1108-1116; c) M. Zhang, S. Yu, R. Hua, D. Zhang, H. Qiu and W. Hu, *Org Biomol Chem.* **2023**, *21*, 783-788.
- [3] Y. H. Wen, F. Yang, S. Li, X. Yao, J. Song and L. Z. Gong, *J Am Chem Soc.* **2023**.

## 7. Single crystal X-ray diffraction data

### Crystallographic Data for 4af-major.

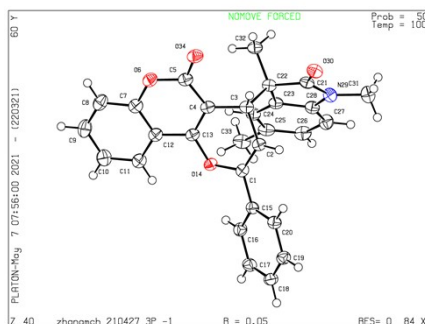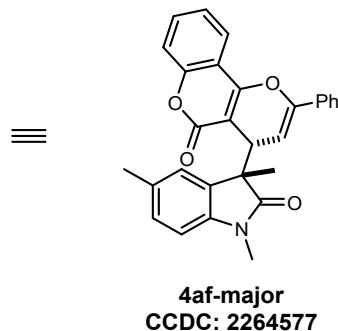

### Datablock: zhangmch\_210427\_3

---

Bond precision: C-C = 0.0020 Å

Wavelength=1.54184

Cell: a=10.0658(1) b=10.9123(2) c=11.3400(2)  
alpha=112.602(1) beta=91.909(1) gamma=104.218(1)

Temperature: 100 K

|                                     | Calculated                                       | Reported                                         |
|-------------------------------------|--------------------------------------------------|--------------------------------------------------|
| Volume                              | 1103.30(3)                                       | 1103.30(3)                                       |
| Space group                         | P -1                                             | P -1                                             |
| Hall group                          | -P 1                                             | -P 1                                             |
| Moiety formula                      | C <sub>29</sub> H <sub>23</sub> N O <sub>4</sub> | C <sub>29</sub> H <sub>23</sub> N O <sub>4</sub> |
| Sum formula                         | C <sub>29</sub> H <sub>23</sub> N O <sub>4</sub> | C <sub>29</sub> H <sub>23</sub> N O <sub>4</sub> |
| Mr                                  | 449.48                                           | 449.48                                           |
| D <sub>x</sub> , g cm <sup>-3</sup> | 1.353                                            | 1.353                                            |
| Z                                   | 2                                                | 2                                                |
| Mu (mm <sup>-1</sup> )              | 0.727                                            | 0.727                                            |
| F <sub>000</sub>                    | 472.0                                            | 472.0                                            |
| F <sub>000</sub> '                  | 473.44                                           |                                                  |
| h, k, lmax                          | 12, 13, 14                                       | 12, 13, 14                                       |
| Nref                                | 4686                                             | 4553                                             |
| Tmin, Tmax                          | 0.865, 0.964                                     | 0.724, 1.000                                     |
| Tmin'                               | 0.865                                            |                                                  |

Correction method= # Reported T Limits: Tmin=0.724 Tmax=1.000  
AbsCorr = MULTI-SCAN

Data completeness= 0.972

Theta(max)= 77.040

R(reflections)= 0.0496( 3918)

wR2(reflections)= 0.1447( 4553)

S = 1.036

Npar= 314

---

## Crystallographic Data for 4af-minor.

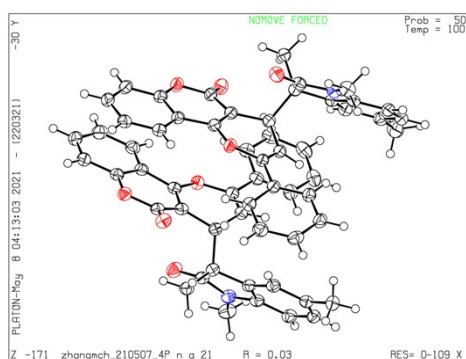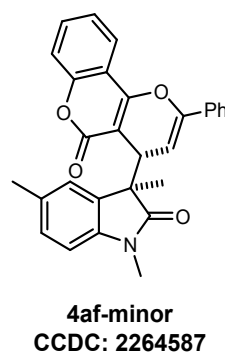

## Datablock: zhangmch\_210507\_4

Bond precision: C-C = 0.0030 Å

Wavelength=1.54184

Cell: a=20.38188 (12) b=10.28920 (5) c=21.05443 (11)  
alpha=90 beta=90 gamma=90  
Temperature: 100 K

|                        | Calculated                                       | Reported                                         |
|------------------------|--------------------------------------------------|--------------------------------------------------|
| Volume                 | 4415.39 (4)                                      | 4415.39 (4)                                      |
| Space group            | P n a 21                                         | P n a 21                                         |
| Hall group             | P 2c -2n                                         | P 2c -2n                                         |
| Moiety formula         | C <sub>29</sub> H <sub>23</sub> N O <sub>4</sub> | C <sub>29</sub> H <sub>23</sub> N O <sub>4</sub> |
| Sum formula            | C <sub>29</sub> H <sub>23</sub> N O <sub>4</sub> | C <sub>29</sub> H <sub>23</sub> N O <sub>4</sub> |
| Mr                     | 449.48                                           | 449.48                                           |
| Dx, g cm <sup>-3</sup> | 1.352                                            | 1.352                                            |
| Z                      | 8                                                | 8                                                |
| Mu (mm <sup>-1</sup> ) | 0.727                                            | 0.727                                            |
| F <sub>000</sub>       | 1888.0                                           | 1888.0                                           |
| F <sub>000</sub> '     | 1893.77                                          |                                                  |
| h, k, lmax             | 25, 13, 26                                       | 25, 13, 26                                       |
| Nref                   | 9319 [ 4789]                                     | 9215                                             |
| Tmin, Tmax             | 0.840, 0.865                                     | 0.566, 1.000                                     |
| Tmin'                  | 0.804                                            |                                                  |

Correction method= # Reported T Limits: Tmin=0.566 Tmax=1.000  
AbsCorr = MULTI-SCAN

Data completeness= 1.92/0.99

Theta(max)= 77.014

R(reflections)= 0.0297 ( 9041)

wR2(reflections)= 0.0766 ( 9215)

S = 1.067

Npar= 620

## Crystallographic Data for 7a.

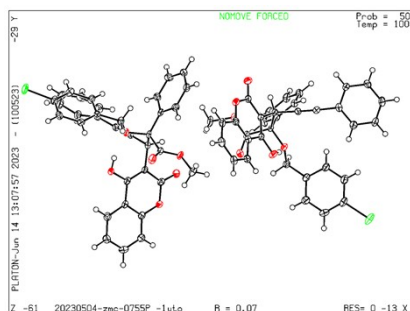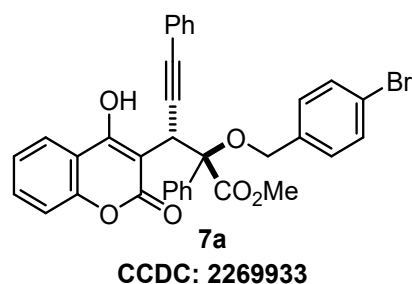

## Datablock: 20230504-zmc-0755-3\_auto

Bond precision: C-C = 0.0080 Å

Wavelength=1.54184

Cell: a=8.6733 (3)  
alpha=66.991 (2)

b=17.8722 (4)  
beta=86.552 (2)

c=19.6955 (5)  
gamma=87.993 (2)

Temperature: 100 K

|                        | Calculated    | Reported          |
|------------------------|---------------|-------------------|
| Volume                 | 2804.82 (14)  | 2804.82 (14)      |
| Space group            | P -1          | P -1              |
| Hall group             | -P 1          | -P 1              |
| Moiety formula         | C34 H25 Br O6 | 2 (C34 H25 Br O6) |
| Sum formula            | C34 H25 Br O6 | C68 H50 Br2 O12   |
| Mr                     | 609.44        | 1218.90           |
| Dx, g cm <sup>-3</sup> | 1.443         | 1.443             |
| Z                      | 4             | 2                 |
| Mu (mm <sup>-1</sup> ) | 2.381         | 2.381             |
| F000                   | 1248.0        | 1248.0            |
| F000'                  | 1248.80       |                   |
| h, k, lmax             | 10, 21, 23    | 10, 21, 23        |
| Nref                   | 9913          | 9853              |
| Tmin, Tmax             | 0.735, 0.788  | 0.487, 1.000      |
| Tmin'                  | 0.666         |                   |

Correction method= # Reported T Limits: Tmin=0.487 Tmax=1.000

AbsCorr = MULTI-SCAN

Data completeness= 0.994

Theta(max)= 66.597

R(reflections)= 0.0746 ( 8568)

wR2(reflections)=  
0.2223 ( 9853)

S = 1.096

Npar= 743





## 8. Analytical data of products

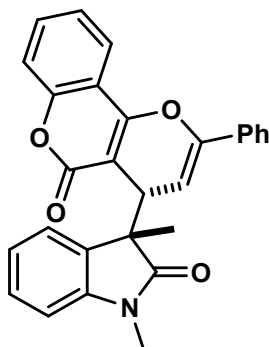

### 1,3-dimethyl-3-(5-oxo-2-phenyl-4H,5H-pyrano[3,2-c]chromen-4-yl)indolin-2-one

**4aa:** 27.4 mg, light yellow solid, 63% yield, 94:6 *dr*.

**<sup>1</sup>H NMR** (500 MHz, CDCl<sub>3</sub>) δ 7.85 (d, *J* = 7.1 Hz, 1H), 7.65 – 7.60 (m, 1H), 7.44 (d, *J* = 8.3 Hz, 1H), 7.38 – 7.32 (m, 6H), 7.17 (t, *J* = 7.5 Hz, 1H), 6.93 (d, *J* = 7.3 Hz, 1H), 6.84 (t, *J* = 7.5 Hz, 1H), 6.75 (d, *J* = 7.7 Hz, 1H), 5.53 (d, *J* = 5.9 Hz, 1H), 4.20 (d, *J* = 5.9 Hz, 1H), 3.26 (s, 3H), 1.49 (s, 3H).

**<sup>13</sup>C NMR** (125 MHz, CDCl<sub>3</sub>) δ 178.8, 162.6, 159.1, 152.9, 151.1, 143.7, 132.5, 132.4, 131.6, 129.4, 128.7, 128.5, 124.9, 124.4, 123.2, 122.6, 122.3, 117.1, 114.7, 107.9, 100.9, 99.5, 54.7, 37.5, 26.4, 19.7.

**HRMS-ESI:** calcd. for C<sub>28</sub>H<sub>21</sub>NO<sub>4</sub>Na [M+Na]<sup>+</sup> : 458.1363; found: 458.1342.

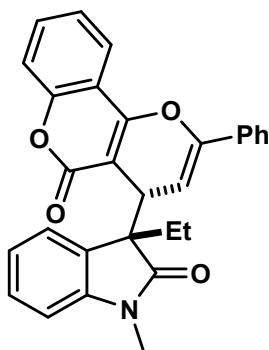

### 3-ethyl-1-methyl-3-(5-oxo-2-phenyl-4H,5H-pyrano[3,2-c]chromen-4-yl)indolin-2-one

**4ab:** 31.4 mg, white solid, 70% yield, >20:1 *dr*.

**<sup>1</sup>H NMR** (500 MHz, CDCl<sub>3</sub>) δ 7.83 (d, *J* = 7.7 Hz, 1H), 7.62 (t, *J* = 7.4 Hz, 1H), 7.43 (d, *J* = 8.1 Hz, 1H), 7.37 – 7.32 (m, 6H), 7.17 (t, *J* = 7.2 Hz, 1H), 6.88 – 6.82 (m, 2H), 6.73 (d, *J* = 7.6 Hz, 1H), 5.53 (d, *J* = 5.5 Hz, 1H), 4.22 (d, *J* = 5.2 Hz, 1H), 3.26 (s, 3H), 2.37 – 2.28 (m, 1H), 2.04 – 1.95 (m, 1H), 0.44 (t, *J* = 6.9 Hz, 3H).

**<sup>13</sup>C NMR** (125 MHz, CDCl<sub>3</sub>) δ 178.0, 162.6, 159.2, 152.9, 151.0, 144.7, 132.4, 129.4, 129.3, 128.6, 128.5, 124.9, 124.4, 123.3, 122.6, 122.3, 117.1, 114.7, 107.8, 101.0, 99.5, 60.9, 37.7, 26.5, 26.2, 9.1.

**HRMS-ESI:** calcd. for C<sub>29</sub>H<sub>23</sub>NO<sub>4</sub>Na [M+Na]<sup>+</sup> : 472.1519; found: 472.1502.

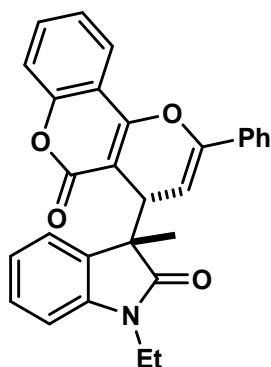

**1-ethyl-3-methyl-3-(5-oxo-2-phenyl-4H,5H-pyrano[3,2-c]chromen-4-yl)indolin-2-one**

**4ac:** 31.4 mg, light yellow solid, 70% yield, >20:1 *dr*.

**<sup>1</sup>H NMR** (500 MHz, CDCl<sub>3</sub>) δ 7.85 (d, *J* = 7.3 Hz, 1H), 7.64 – 7.60 (m, 1H), 7.43 (d, *J* = 8.3 Hz, 1H), 7.38 – 7.31 (m, 6H), 7.17 (t, *J* = 7.6 Hz, 1H), 6.94 (d, *J* = 7.3 Hz, 1H), 6.83 (t, *J* = 7.5 Hz, 1H), 6.75 (d, *J* = 7.8 Hz, 1H), 5.56 (d, *J* = 5.9 Hz, 1H), 4.22 (d, *J* = 5.9 Hz, 1H), 3.90 (dq, *J* = 14.4, 7.2 Hz, 1H), 3.67 (dq, *J* = 14.3, 7.1 Hz, 1H), 1.48 (s, 3H), 1.23 (t, *J* = 7.2 Hz, 3H).

**<sup>13</sup>C NMR** (125 MHz, CDCl<sub>3</sub>) δ 178.4, 162.6, 159.2, 152.9, 151.0, 142.7, 132.4, 132.3, 131.9, 129.4, 128.6, 128.4, 124.8, 124.4, 123.4, 122.6, 122.1, 117.1, 114.7, 108.0, 100.8, 99.6, 54.5, 37.5, 34.7, 19.8, 12.9.

**HRMS-ESI:** calcd. for C<sub>29</sub>H<sub>23</sub>NO<sub>4</sub>Na [M+Na]<sup>+</sup> : 472.1519; found: 472.1500.

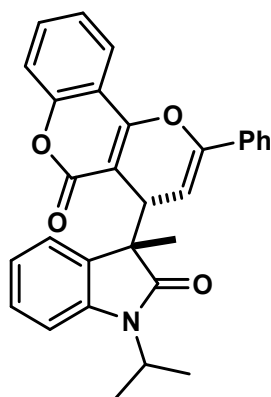

**1-isopropyl-3-methyl-3-(5-oxo-2-phenyl-4H,5H-pyrano[3,2-c]chromen-4-yl)indolin-2-one**

**4ad:** 32.4 mg, white solid, 70% yield, >20:1 *dr*.

**<sup>1</sup>H NMR** (500 MHz, CDCl<sub>3</sub>) δ 7.84 (d, *J* = 7.8 Hz, 1H), 7.62 (t, *J* = 7.7 Hz, 1H), 7.43 (d, *J* = 8.3 Hz, 1H), 7.38 – 7.31 (m, 6H), 7.14 (t, *J* = 7.7 Hz, 1H), 6.94 (d, *J* = 7.3 Hz, 1H), 6.90 (d, *J* = 7.8 Hz, 1H), 6.82 (t, *J* = 7.4 Hz, 1H), 5.56 (d, *J* = 5.8 Hz, 1H), 4.72 – 4.62 (m, 1H), 4.21 (d, *J* = 5.8 Hz, 1H), 1.47 (s, 3H), 1.45 (d, *J* = 7.1 Hz, 3H), 1.42 (d, *J* = 7.0 Hz, 3H).

**<sup>13</sup>C NMR** (125 MHz, CDCl<sub>3</sub>) δ 178.4, 162.6, 159.2, 152.9, 150.9, 142.3, 132.4, 132.3, 132.1, 129.3, 128.6, 128.1, 124.7, 124.4, 123.5, 122.6, 121.7, 117.0, 114.7, 109.7, 100.9, 99.7, 54.3, 43.8, 37.7, 20.0, 19.6, 19.5.

**HRMS-ESI:** calcd. for C<sub>30</sub>H<sub>25</sub>NO<sub>4</sub>Na [M+Na]<sup>+</sup> : 486.1676; found: 486.1673.

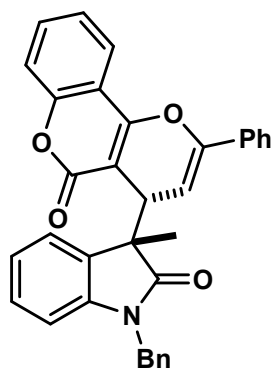

**1-benzyl-3-methyl-3-(5-oxo-2-phenyl-4H,5H-pyrano[3,2-c]chromen-4-yl)indolin-2-one**

**4ae:** 40.9 mg, white solid, 80% yield, >20:1 *dr*.

**<sup>1</sup>H NMR** (500 MHz, CDCl<sub>3</sub>) δ 7.85 (d, *J* = 7.7 Hz, 1H), 7.62 (t, *J* = 7.7 Hz, 1H), 7.43 (d, *J* = 8.3 Hz, 1H), 7.39 – 7.33 (m, 3H), 7.32 – 7.28 (m, 1H), 7.27 – 7.19 (m, 5H), 7.13 (d, *J* = 7.5 Hz, 2H), 7.07 (t, *J* = 7.7 Hz, 1H), 6.95 (d, *J* = 7.3 Hz, 1H), 6.81 (t, *J* = 7.5 Hz, 1H), 6.69 (d, *J* = 7.8 Hz, 1H), 5.49 (d, *J* = 5.9 Hz, 1H), 5.17 (d, *J* = 15.4 Hz, 1H), 4.69 (d, *J* = 15.4 Hz, 1H), 4.31 (d, *J* = 5.8 Hz, 1H), 1.54 (s, 3H).

**<sup>13</sup>C NMR** (125 MHz, CDCl<sub>3</sub>) δ 179.0, 162.6, 159.3, 152.9, 151.1, 142.8, 136.2, 132.5, 132.3, 131.8, 129.3, 128.9, 128.6, 128.3, 127.9, 127.8, 125.0, 124.4, 123.2, 122.6, 122.4, 117.1, 114.7, 108.9, 100.8, 99.8, 54.7, 44.1, 37.5, 20.5.

**HRMS-ESI:** calcd. for C<sub>34</sub>H<sub>25</sub>NO<sub>4</sub>Na [M+Na]<sup>+</sup> : 534.1676; found: 534.1651.

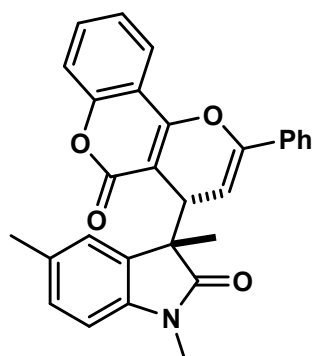

**1,3,5-trimethyl-3-(5-oxo-2-phenyl-4H,5H-pyrano[3,2-c]chromen-4-yl)indolin-2-one**

**4af:** 37.3 mg, light yellow solid, 83% yield, >20:1 *dr*.

**<sup>1</sup>H NMR** (500 MHz, CDCl<sub>3</sub>) δ 7.83 (d, *J* = 7.5 Hz, 1H), 7.63 (t, *J* = 7.4 Hz, 1H), 7.44 (d, *J* = 8.3 Hz, 1H), 7.38 – 7.33 (m, 6H), 6.96 (d, *J* = 7.7 Hz, 1H), 6.68 (s, 1H), 6.61 (d, *J* = 7.8 Hz, 1H), 5.53 (d, *J* = 5.9 Hz, 1H), 4.19 (d, *J* = 5.9 Hz, 1H), 3.23 (s, 3H), 2.05 (s, 3H), 1.48 (s, 3H).

**<sup>13</sup>C NMR** (125 MHz, CDCl<sub>3</sub>) δ 178.7, 162.6, 159.1, 152.8, 150.9, 141.3, 132.41, 132.40, 131.6, 131.5, 129.4, 128.63, 128.56, 124.9, 124.4, 124.3, 122.3, 117.1, 114.7, 107.5, 100.8, 99.6, 54.8, 37.5, 26.3, 21.1, 19.6.

**HRMS-ESI:** calcd. for C<sub>29</sub>H<sub>23</sub>NO<sub>4</sub>Na [M+Na]<sup>+</sup> : 472.1519; found: 472.1496.

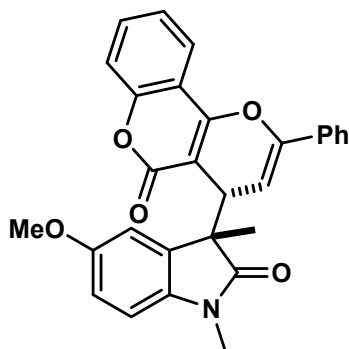

**5-methoxy-1,3-dimethyl-3-(5-oxo-2-phenyl-4H,5H-pyrano[3,2-c]chromen-4-yl)indolin-2-one**  
**4ag**: 30.2 mg, red brown solid, 65% yield, 89:11 *dr*.

$^1\text{H NMR}$  (500 MHz,  $\text{CDCl}_3$ )  $\delta$  7.86 (d,  $J = 7.8$  Hz, 1H), 7.62 (t,  $J = 7.8$  Hz, 1H), 7.44 (d,  $J = 8.3$  Hz, 1H), 7.38 – 7.33 (m, 6H), 6.72 – 6.69 (m, 1H), 6.66 – 6.63 (m, 1H), 6.53 – 6.50 (m, 1H), 5.54 (d,  $J = 5.9$  Hz, 1H), 4.22 (d,  $J = 5.9$  Hz, 1H), 3.43 (s, 3H), 3.24 (s, 3H), 1.48 (s, 3H).

$^{13}\text{C NMR}$  (125 MHz,  $\text{CDCl}_3$ )  $\delta$  178.5, 162.6, 159.2, 155.7, 152.9, 151.0, 137.2, 132.8, 132.5, 132.4, 129.5, 128.7, 124.9, 124.5, 122.5, 117.1, 114.7, 113.7, 110.1, 108.3, 100.8, 99.6, 55.6, 55.1, 37.5, 26.4, 19.9.

**HRMS-ESI**: calcd. for  $\text{C}_{29}\text{H}_{23}\text{NO}_5\text{Na}$   $[\text{M}+\text{Na}]^+$  : 488.1468; found: 488.1449.

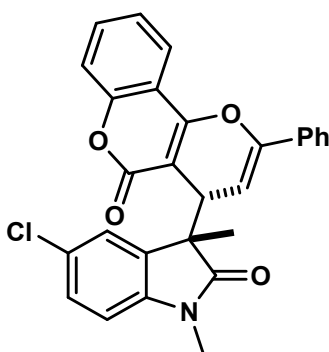

**5-chloro-1,3-dimethyl-3-(5-oxo-2-phenyl-4H,5H-pyrano[3,2-c]chromen-4-yl)indolin-2-one**  
**4ah**: 23.5 mg, light yellow solid, 50% yield, 83:17 *dr*.

$^1\text{H NMR}$  (500 MHz,  $\text{CDCl}_3$ )  $\delta$  7.89 (d,  $J = 7.8$  Hz, 1H), 7.64 (t,  $J = 7.7$  Hz, 1H), 7.44 (d,  $J = 8.3$  Hz, 1H), 7.40 – 7.34 (m, 6H), 7.15 (dd,  $J = 8.2, 1.8$  Hz, 1H), 6.90 (d,  $J = 1.6$  Hz, 1H), 6.66 (d,  $J = 8.3$  Hz, 1H), 5.53 (d,  $J = 5.9$  Hz, 1H), 4.19 (d,  $J = 5.9$  Hz, 1H), 3.24 (s, 3H), 1.47 (s, 3H).

$^{13}\text{C NMR}$  (125 MHz,  $\text{CDCl}_3$ )  $\delta$  178.3, 162.5, 159.4, 152.9, 151.3, 142.3, 133.4, 132.6, 132.2, 129.6, 128.8, 128.3, 127.7, 124.9, 124.6, 123.8, 122.6, 117.1, 114.5, 108.8, 100.4, 99.1, 54.9, 37.5, 26.5, 19.3.

**HRMS-ESI**: calcd. for  $\text{C}_{28}\text{H}_{20}\text{ClNO}_4\text{Na}$   $[\text{M}+\text{Na}]^+$  : 492.0973; found: 492.0960.

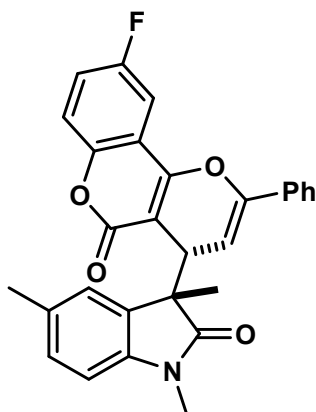

**3-(9-fluoro-5-oxo-2-phenyl-4H,5H-pyrano[3,2-c]chromen-4-yl)-1,3,5-trimethylindolin-2-one**

**4ba:** 29.0 mg, light yellow solid, 62% yield, 76:24 *dr* as determined by crude  $^1\text{H}$  spectroscopy, but 85:15 *dr* after recrystallization.

$^1\text{H NMR}$  (500 MHz,  $\text{CDCl}_3$ ) (two diastereomers)  $\delta$  7.60 (dd,  $J = 8.1, 2.8$  Hz, 1H), 7.48 (dd,  $J = 8.0, 2.8$  Hz, 1H), 7.43 (dd,  $J = 9.0, 4.2$  Hz, 1H), 7.40 – 7.37 (m, 1H), 7.37 – 7.31 (m, 6H), 7.30 – 7.27 (m, 1H), 5.54 (d,  $J = 5.9$  Hz, 1H), 5.30 (d,  $J = 2.0$  Hz, 1H), 4.16 (d,  $J = 5.9$  Hz, 1H), 4.13 (d,  $J = 5.7$  Hz, 1H), 3.23 (s, 3H), 3.02 (s, 1H), 2.35 (s, 1H), 2.10 (s, 3H), 1.48 (s, 1H), 1.46 (s, 3H).

$^{13}\text{C NMR}$  (125 MHz,  $\text{CDCl}_3$ ) (two diastereomers)  $\delta$  178.6, 162.2, 159.0 (d,  $J = 244.7$  Hz), 158.3 (d,  $J = 2.7$  Hz), 151.0, 148.98, 148.97, 148.94, 141.4, 132.7, 132.5, 132.4, 132.2, 131.7, 131.5, 129.64, 129.56, 128.8, 128.74, 128.71, 125.1, 124.9, 124.2, 123.7, 119.9 (d,  $J = 24.5$  Hz), 118.9 (d,  $J = 8.3$  Hz), 115.6 (d,  $J = 8.9$  Hz), 108.1 (d,  $J = 25.4$  Hz), 107.7, 107.6, 101.9, 101.3, 99.7, 99.6, 54.7, 54.0, 37.6, 26.4, 26.2, 21.3, 21.1, 19.8, 19.6.

$^{19}\text{F NMR}$  (376 MHz,  $\text{CDCl}_3$ ) (two diastereomers)  $\delta$  -116.66, -117.08.

**HRMS-ESI:** calcd. for  $\text{C}_{29}\text{H}_{22}\text{FNO}_4\text{Na}$   $[\text{M}+\text{Na}]^+$  : 490.1425; found: 490.1415.

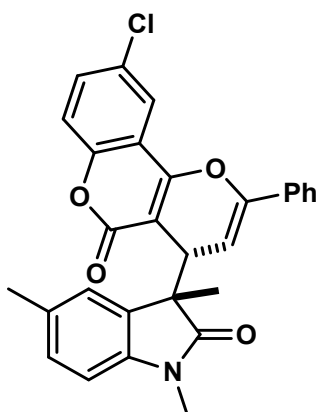

**3-(9-chloro-5-oxo-2-phenyl-4H,5H-pyrano[3,2-c]chromen-4-yl)-1,3,5-trimethylindolin-2-one**

**4bb:** 34.3 mg, yellow solid, 71% yield, 75:25 *dr* as determined by crude  $^1\text{H}$  spectroscopy, but only one isomer after recrystallization.

$^1\text{H NMR}$  (500 MHz,  $\text{CDCl}_3$ )  $\delta$  7.76 (d,  $J = 2.2$  Hz, 1H), 7.57 (dd,  $J = 8.8, 2.2$  Hz, 1H), 7.41 – 7.33 (m, 6H), 6.98 (d,  $J = 7.8$  Hz, 1H), 6.68 (s, 1H), 6.63 (d,  $J = 7.8$  Hz, 1H), 5.54 (d,  $J = 5.9$  Hz, 1H), 4.15 (d,  $J = 5.9$  Hz, 1H), 3.22 (s, 3H), 2.11 (s, 3H), 1.46 (s, 3H).

$^{13}\text{C NMR}$  (125 MHz,  $\text{CDCl}_3$ )  $\delta$  178.5, 162.0, 158.0, 151.2, 151.1, 141.3, 132.4, 132.2, 131.7, 131.5, 130.0, 129.6, 128.8, 128.7, 125.0, 124.2, 121.8, 118.7, 115.9, 107.7, 101.9, 99.7, 54.6, 37.6, 26.4, 21.2,

19.5.

HRMS-ESI: calcd. for  $C_{29}H_{22}ClNO_4Na$   $[M+Na]^+$  : 506.1130; found: 506.1105.

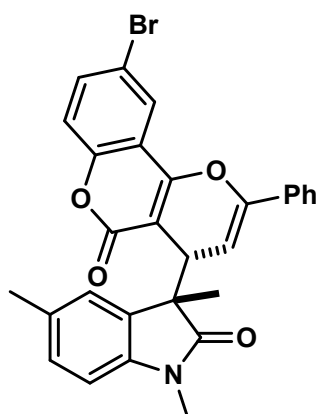

**3-(9-bromo-5-oxo-2-phenyl-4H,5H-pyrano[3,2-c]chromen-4-yl)-1,3,5-trimethylindolin-2-one 4bc:** 35.8 mg, yellow solid, 68% yield, 74:26 *dr* as determined by crude  $^1H$  spectroscopy, but 86:14 *dr* after recrystallization.

$^1H$  NMR (500 MHz,  $CDCl_3$ ) (two diastereomers)  $\delta$  8.04 (s, 1H), 7.91 (s, 1H), 7.71 (d,  $J = 8.8$  Hz, 1H), 7.65 (d,  $J = 8.8$  Hz, 1H), 7.43 – 7.31 (m, 7H), 7.25 (d,  $J = 9.2$  Hz, 1H), 7.19 (s, 1H), 7.10 (d,  $J = 7.7$  Hz, 1H), 6.98 (d,  $J = 7.8$  Hz, 1H), 6.71 (d,  $J = 8.0$  Hz, 1H), 6.68 (s, 1H), 6.63 (d,  $J = 7.8$  Hz, 1H), 5.54 (d,  $J = 5.9$  Hz, 1H), 5.28 (d,  $J = 5.6$  Hz, 1H), 4.15 (d,  $J = 5.9$  Hz, 1H), 4.12 (d,  $J = 5.6$  Hz, 1H), 3.22 (s, 3H), 3.02 (s, 1H), 2.36 (s, 1H), 2.11 (s, 3H), 1.46 (s, 1H), 1.46 (s, 3H).

$^{13}C$  NMR (125 MHz,  $CDCl_3$ ) (two diastereomers)  $\delta$  178.5, 161.9, 157.8, 151.7, 151.6, 151.1, 150.3, 141.3, 135.2, 135.0, 132.4, 132.2, 131.7, 131.5, 129.7, 129.6, 128.82, 128.76, 128.7, 125.4, 125.2, 125.0, 124.8, 124.2, 123.7, 118.9, 118.6, 117.3, 117.2, 116.4, 116.3, 107.7, 107.6, 101.9, 101.3, 99.7, 99.6, 54.6, 54.0, 37.6, 37.5, 26.4, 26.2, 21.3, 21.2, 19.8, 19.5.

HRMS-ESI: calcd. for  $C_{29}H_{22}BrNO_4Na$   $[M+Na]^+$  : 550.0624; found: 550.0607.

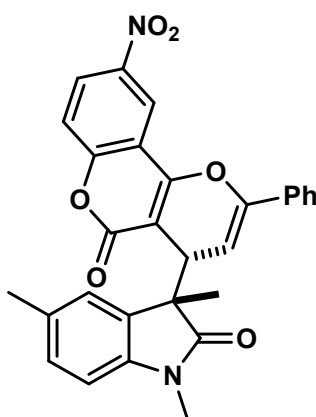

**1,3,5-trimethyl-3-(9-nitro-5-oxo-2-phenyl-4H,5H-pyrano[3,2-c]chromen-4-yl)indolin-2-one 4bd:** 44.5 mg, red brown solid, 90% yield, >20:1 *dr*.

$^1H$  NMR (500 MHz,  $CDCl_3$ )  $\delta$  8.71 (s, 1H), 8.49 (d,  $J = 8.1$  Hz, 1H), 7.57 (d,  $J = 9.0$  Hz, 1H), 7.43 – 7.39 (m, 5H), 7.02 (d,  $J = 7.7$  Hz, 1H), 6.74 (s, 1H), 6.68 (d,  $J = 7.9$  Hz, 1H), 5.60 (d,  $J = 5.7$  Hz, 1H), 4.12 (d,  $J = 5.7$  Hz, 1H), 3.23 (s, 3H), 2.13 (s, 3H), 1.45 (s, 3H).

$^{13}\text{C}$  NMR (125 MHz,  $\text{CDCl}_3$ )  $\delta$  178.4, 161.0, 157.6, 156.1, 151.4, 144.2, 141.3, 131.84, 131.79, 131.4, 129.9, 129.0, 128.9, 127.1, 125.0, 124.0, 118.7, 118.4, 115.1, 107.9, 102.8, 99.5, 54.3, 37.6, 26.4, 21.2, 19.2.

HRMS-ESI: calcd. for  $\text{C}_{29}\text{H}_{22}\text{N}_2\text{O}_6\text{Na}$   $[\text{M}+\text{Na}]^+$  : 517.1370; found: 517.1363.

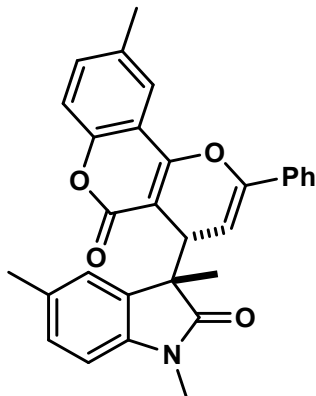

**1,3,5-trimethyl-3-(9-methyl-5-oxo-2-phenyl-4H,5H-pyrano[3,2-c]chromen-4-yl)indolin-2-one**  
**4be**: 13.9 mg, yellow solid, 30% yield, >20:1 *dr*.

$^1\text{H}$  NMR (500 MHz,  $\text{CDCl}_3$ )  $\delta$  7.57 (s, 1H), 7.42 (d,  $J = 8.2$  Hz, 1H), 7.36 – 7.31 (m, 6H), 6.95 (d,  $J = 7.7$  Hz, 1H), 6.67 (s, 1H), 6.61 (d,  $J = 7.8$  Hz, 1H), 5.51 (d,  $J = 5.9$  Hz, 1H), 4.18 (d,  $J = 5.9$  Hz, 1H), 3.22 (s, 3H), 2.47 (s, 3H), 2.06 (s, 3H), 1.47 (s, 3H).

$^{13}\text{C}$  NMR (125 MHz,  $\text{CDCl}_3$ )  $\delta$  178.7, 162.8, 159.1, 151.0, 150.9, 141.3, 134.2, 133.4, 132.6, 131.59, 131.57, 129.4, 128.6, 128.5, 125.0, 124.4, 121.9, 116.8, 114.4, 107.5, 100.7, 99.7, 54.8, 37.5, 26.3, 21.2, 21.1, 19.7.

HRMS-ESI: calcd. for  $\text{C}_{30}\text{H}_{25}\text{NO}_4\text{Na}$   $[\text{M}+\text{Na}]^+$  : 486.1676; found: 486.1654.

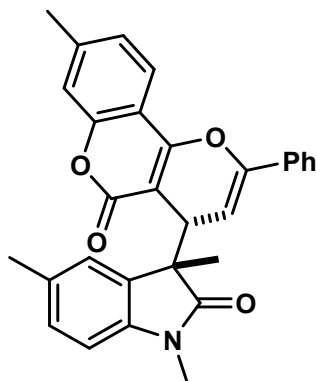

**1,3,5-trimethyl-3-(8-methyl-5-oxo-2-phenyl-4H,5H-pyrano[3,2-c]chromen-4-yl)indolin-2-one**  
**4bf**: 29.2 mg, yellow solid, 63% yield, 91:9 *dr*.

$^1\text{H}$  NMR (500 MHz,  $\text{CDCl}_3$ )  $\delta$  7.69 (d,  $J = 8.0$  Hz, 1H), 7.35 – 7.30 (m, 5H), 7.24 (s, 1H), 7.17 (d,  $J = 8.0$  Hz, 1H), 6.95 (d,  $J = 7.8$  Hz, 1H), 6.67 (s, 1H), 6.60 (d,  $J = 7.8$  Hz, 1H), 5.51 (d,  $J = 5.9$  Hz, 1H), 4.18 (d,  $J = 5.9$  Hz, 1H), 3.23 (s, 3H), 2.51 (s, 3H), 2.06 (s, 3H), 1.47 (s, 3H).

$^{13}\text{C}$  NMR (125 MHz,  $\text{CDCl}_3$ )  $\delta$  178.8, 162.9, 159.4, 153.0, 150.8, 143.7, 141.3, 132.5, 131.61, 131.56, 129.3, 128.6, 128.5, 125.6, 124.9, 124.3, 122.0, 117.2, 112.2, 107.5, 99.8, 99.7, 54.9, 37.5, 26.3, 22.0, 21.1, 19.7.

HRMS-ESI: calcd. for  $\text{C}_{30}\text{H}_{25}\text{NO}_4\text{Na}$   $[\text{M}+\text{Na}]^+$  : 486.1676; found: 486.1657.

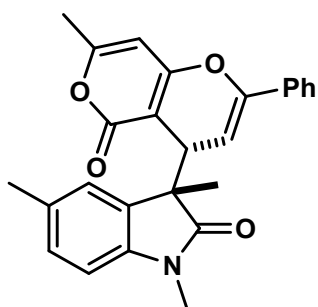

**1,3,5-trimethyl-3-(7-methyl-5-oxo-2-phenyl-4H,5H-pyrano[4,3-b]pyran-4-yl)indolin-2-one**

**4bg:** 23.1 mg, light yellow solid, 56% yield, >20:1 *dr*.

<sup>1</sup>H NMR (500 MHz, CDCl<sub>3</sub>) δ 7.30 – 7.25 (m, 3H), 7.23 – 7.19 (m, 2H), 6.96 (d, *J* = 7.8 Hz, 1H), 6.78 (s, 1H), 6.60 (d, *J* = 7.9 Hz, 1H), 5.96 (s, 1H), 5.40 (d, *J* = 5.9 Hz, 1H), 4.05 (d, *J* = 5.9 Hz, 1H), 3.21 (s, 3H), 2.34 (s, 3H), 2.25 (s, 3H), 1.46 (s, 3H).

<sup>13</sup>C NMR (125 MHz, CDCl<sub>3</sub>) δ 178.9, 164.4, 163.9, 161.9, 150.6, 141.3, 132.4, 131.8, 131.5, 129.2, 128.5, 124.8, 124.3, 107.5, 99.7, 99.1, 98.0, 55.0, 37.0, 26.3, 21.3, 20.2, 19.9.

HRMS-ESI: calcd. for C<sub>26</sub>H<sub>23</sub>NO<sub>4</sub>Na [M+Na]<sup>+</sup> : 436.1519; found: 436.1502.

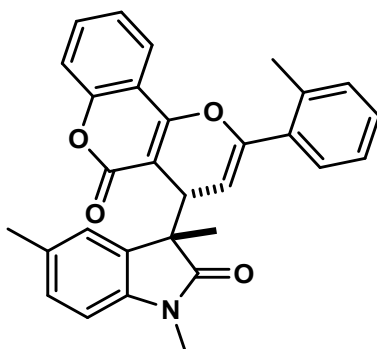

**1,3,5-trimethyl-3-(5-oxo-2-(o-tolyl)-4H,5H-pyrano[3,2-c]chromen-4-yl)indolin-2-one**

**4ca:** 18.5 mg, yellow solid, 40% yield, >20:1 *dr*.

<sup>1</sup>H NMR (500 MHz, CDCl<sub>3</sub>) δ 7.68 (d, *J* = 7.7 Hz, 1H), 7.61 (t, *J* = 7.6 Hz, 1H), 7.44 (d, *J* = 8.1 Hz, 1H), 7.30 (t, *J* = 7.4 Hz, 1H), 7.26 – 7.23 (m, 1H), 7.14 – 7.10 (m, 2H), 7.04 (d, *J* = 7.6 Hz, 1H), 6.86 (d, *J* = 7.3 Hz, 1H), 6.75 – 6.69 (m, 2H), 5.17 (d, *J* = 5.2 Hz, 1H), 4.26 (d, *J* = 5.1 Hz, 1H), 3.23 (s, 3H), 2.07 (s, 3H), 2.00 (s, 3H), 1.48 (s, 3H).

<sup>13</sup>C NMR (125 MHz, CDCl<sub>3</sub>) δ 178.8, 162.7, 159.6, 152.8, 152.3, 141.5, 136.7, 133.0, 132.4, 131.9, 131.9, 130.6, 129.5, 129.3, 128.6, 125.8, 124.40, 124.35, 122.4, 117.0, 114.5, 107.6, 103.6, 100.5, 54.8, 37.4, 26.4, 21.1, 20.6, 19.8.

HRMS-ESI: calcd. for C<sub>30</sub>H<sub>25</sub>NO<sub>4</sub>Na [M+Na]<sup>+</sup> : 486.1676; found: 486.1668.



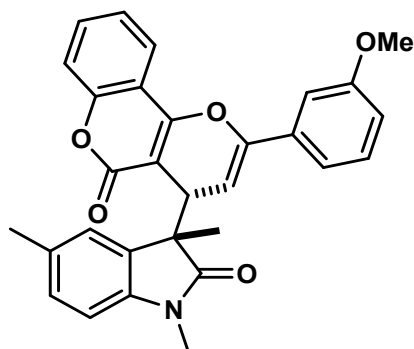

**3-(2-(3-methoxyphenyl)-5-oxo-4H,5H-pyrano[3,2-c]chromen-4-yl)-1,3,5-trimethylindolin-2-one**

**4cb:** 29.2 mg, red brown solid, 61% yield, >20:1 *dr*.

**<sup>1</sup>H NMR** (500 MHz, CDCl<sub>3</sub>) δ 7.81 (d, *J* = 7.8 Hz, 1H), 7.65 – 7.60 (m, 1H), 7.44 (d, *J* = 8.3 Hz, 1H), 7.36 (t, *J* = 7.6 Hz, 1H), 7.27 – 7.23 (m, 1H), 6.96 (d, *J* = 7.8 Hz, 1H), 6.92 (d, *J* = 7.7 Hz, 1H), 6.89 – 6.84 (m, 2H), 6.67 (s, 1H), 6.62 (d, *J* = 7.8 Hz, 1H), 5.52 (d, *J* = 5.9 Hz, 1H), 4.18 (d, *J* = 5.9 Hz, 1H), 3.81 (s, 3H), 3.23 (s, 3H), 2.05 (s, 3H), 1.47 (s, 3H).

**<sup>13</sup>C NMR** (125 MHz, CDCl<sub>3</sub>) δ 178.7, 162.6, 159.7, 159.1, 152.8, 150.7, 141.3, 133.8, 132.4, 131.6, 131.5, 129.7, 128.6, 124.5, 124.3, 122.3, 117.4, 117.1, 114.7, 114.4, 111.1, 107.5, 100.8, 99.9, 55.4, 54.8, 37.5, 26.4, 21.1, 19.6.

**HRMS-ESI:** calcd. for C<sub>30</sub>H<sub>25</sub>NO<sub>5</sub>Na [M+Na]<sup>+</sup> : 502.1625; found: 502.1610.

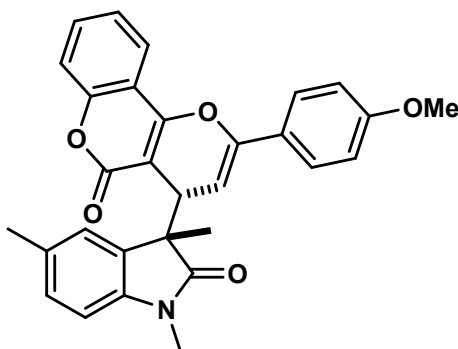

**3-(2-(4-methoxyphenyl)-5-oxo-4H,5H-pyrano[3,2-c]chromen-4-yl)-1,3,5-trimethylindolin-2-one**

**4cc:** 28.7 mg, yellow solid, 60% yield, >20:1 *dr*.

**<sup>1</sup>H NMR** (500 MHz, CDCl<sub>3</sub>) δ 7.81 (d, *J* = 7.8 Hz, 1H), 7.62 (t, *J* = 7.8 Hz, 1H), 7.44 (d, *J* = 8.3 Hz, 1H), 7.36 (t, *J* = 7.6 Hz, 1H), 7.29 – 7.25 (m, 2H), 6.95 (d, *J* = 7.8 Hz, 1H), 6.85 (d, *J* = 8.7 Hz, 2H), 6.67 (s, 1H), 6.61 (d, *J* = 7.8 Hz, 1H), 5.40 (d, *J* = 5.9 Hz, 1H), 4.16 (d, *J* = 5.9 Hz, 1H), 3.81 (s, 3H), 3.23 (s, 3H), 2.05 (s, 3H), 1.47 (s, 3H).

**<sup>13</sup>C NMR** (125 MHz, CDCl<sub>3</sub>) δ 178.8, 162.7, 160.5, 159.1, 152.8, 150.7, 141.3, 132.3, 131.59, 131.58, 128.5, 126.4, 125.0, 124.4, 124.3, 122.3, 117.1, 114.8, 114.0, 107.5, 100.9, 97.7, 55.5, 54.8, 37.5, 26.3, 21.1, 19.6.

**HRMS-ESI:** calcd. for C<sub>30</sub>H<sub>25</sub>NO<sub>5</sub>Na [M+Na]<sup>+</sup> : 502.1625; found: 502.1607.

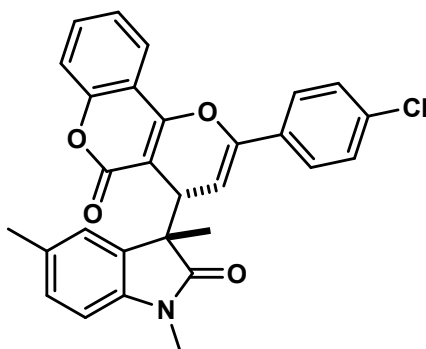

**3-(2-(4-chlorophenyl)-5-oxo-4H,5H-pyrano[3,2-c]chromen-4-yl)-1,3,5-trimethylindolin-2-one 4cd:** 31.9 mg, light yellow solid, 66% yield, >20:1 *dr*.

**<sup>1</sup>H NMR** (500 MHz, CDCl<sub>3</sub>) δ 7.79 (d, *J* = 7.7 Hz, 1H), 7.66 – 7.61 (m, 1H), 7.45 (d, *J* = 8.3 Hz, 1H), 7.37 (t, *J* = 7.6 Hz, 1H), 7.31 (d, *J* = 8.5 Hz, 2H), 7.26 (d, *J* = 8.6 Hz, 2H), 6.96 (d, *J* = 7.8 Hz, 1H), 6.67 (s, 1H), 6.61 (d, *J* = 7.9 Hz, 1H), 5.52 (d, *J* = 6.0 Hz, 1H), 4.19 (d, *J* = 6.0 Hz, 1H), 3.22 (s, 3H), 2.06 (s, 3H), 1.47 (s, 3H).

**<sup>13</sup>C NMR** (125 MHz, CDCl<sub>3</sub>) δ 178.6, 162.5, 159.0, 152.8, 149.9, 141.3, 135.3, 132.5, 131.7, 131.4, 130.9, 128.9, 128.6, 126.1, 124.5, 124.3, 122.2, 117.2, 114.6, 107.5, 100.9, 100.1, 54.8, 37.5, 26.4, 21.1, 19.7.

**HRMS-ESI:** calcd. for C<sub>29</sub>H<sub>22</sub>ClNO<sub>4</sub>Na [M+Na]<sup>+</sup> : 506.1130; found: 506.1109.

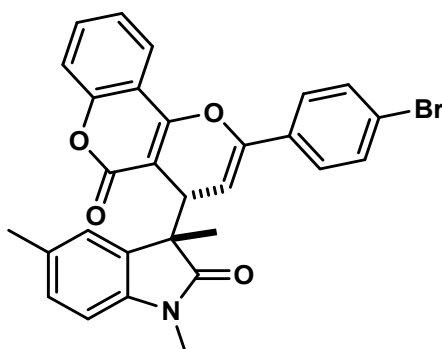

**3-(2-(4-bromophenyl)-5-oxo-4H,5H-pyrano[3,2-c]chromen-4-yl)-1,3,5-trimethylindolin-2-one 4ce:** 40.1 mg, red brown solid, 76% yield, >20:1 *dr*.

**<sup>1</sup>H NMR** (500 MHz, CDCl<sub>3</sub>) δ 7.78 (d, *J* = 7.7 Hz, 1H), 7.63 (t, *J* = 7.6 Hz, 1H), 7.48 – 7.43 (m, 3H), 7.37 (t, *J* = 7.6 Hz, 1H), 7.19 (d, *J* = 8.4 Hz, 2H), 6.96 (d, *J* = 7.8 Hz, 1H), 6.66 (s, 1H), 6.61 (d, *J* = 7.8 Hz, 1H), 5.53 (d, *J* = 5.9 Hz, 1H), 4.18 (d, *J* = 5.9 Hz, 1H), 3.22 (s, 3H), 2.05 (s, 3H), 1.47 (s, 3H).

**<sup>13</sup>C NMR** (125 MHz, CDCl<sub>3</sub>) δ 178.6, 162.5, 159.0, 152.8, 150.0, 141.3, 132.5, 131.9, 131.7, 131.4, 131.3, 128.6, 126.3, 124.5, 124.3, 123.6, 122.2, 117.2, 114.5, 107.5, 100.9, 100.2, 54.8, 37.5, 26.4, 21.1, 19.7.

**HRMS-ESI:** calcd. for C<sub>29</sub>H<sub>22</sub>BrNO<sub>4</sub>Na [M+Na]<sup>+</sup> : 550.0624; found: 550.0599.

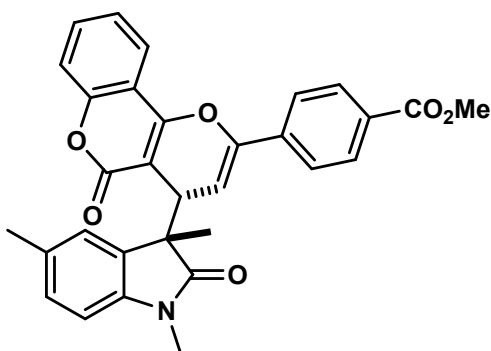

**methyl 4-(5-oxo-4-(1,3,5-trimethyl-2-oxoindolin-3-yl)-4H,5H-pyrano[3,2-c]chromen-2-yl)benzoate**

**4cf:** 23.3 mg, yellow solid, 46% yield, >20:1 *dr*.

$^1\text{H NMR}$  (500 MHz,  $\text{CDCl}_3$ )  $\delta$  8.00 (d,  $J = 8.2$  Hz, 2H), 7.82 (d,  $J = 7.8$  Hz, 1H), 7.65 (t,  $J = 7.8$  Hz, 1H), 7.46 (d,  $J = 8.3$  Hz, 1H), 7.42 – 7.37 (m, 3H), 6.95 (d,  $J = 7.8$  Hz, 1H), 6.68 (s, 1H), 6.59 (d,  $J = 7.8$  Hz, 1H), 5.66 (d,  $J = 6.0$  Hz, 1H), 4.22 (d,  $J = 5.9$  Hz, 1H), 3.93 (s, 3H), 3.22 (s, 3H), 2.06 (s, 3H), 1.48 (s, 3H).

$^{13}\text{C NMR}$  (125 MHz,  $\text{CDCl}_3$ )  $\delta$  178.5, 166.5, 162.5, 159.0, 152.9, 150.0, 141.3, 136.4, 132.6, 131.7, 131.3, 130.8, 130.0, 128.7, 124.60, 124.56, 124.3, 122.3, 117.2, 114.5, 107.6, 101.8, 100.8, 54.8, 52.4, 37.6, 26.4, 21.1, 19.7.

**HRMS-ESI:** calcd. for  $\text{C}_{31}\text{H}_{25}\text{NO}_6\text{Na}$   $[\text{M}+\text{Na}]^+$  : 530.1574; found: 530.1551.

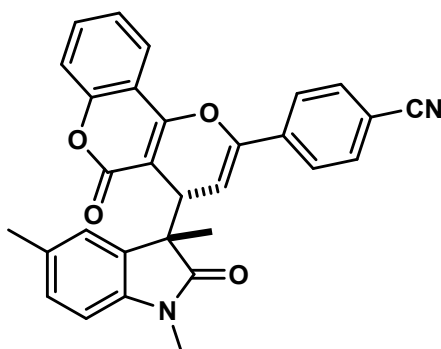

**4-(5-oxo-4-(1,3,5-trimethyl-2-oxoindolin-3-yl)-4H,5H-pyrano[3,2-c]chromen-2-yl)benzonitrile**

**4cg:** 19.4 mg, light yellow solid, 41% yield, >20:1 *dr*.

$^1\text{H NMR}$  (500 MHz,  $\text{CDCl}_3$ )  $\delta$  7.79 (d,  $J = 7.8$  Hz, 1H), 7.68 – 7.63 (m, 3H), 7.45 (t,  $J = 9.0$  Hz, 3H), 7.39 (t,  $J = 7.6$  Hz, 1H), 6.97 (d,  $J = 7.9$  Hz, 1H), 6.68 (s, 1H), 6.61 (d,  $J = 7.8$  Hz, 1H), 5.69 (d,  $J = 6.0$  Hz, 1H), 4.23 (d,  $J = 6.0$  Hz, 1H), 3.21 (s, 3H), 2.07 (s, 3H), 1.48 (s, 3H).

$^{13}\text{C NMR}$  (125 MHz,  $\text{CDCl}_3$ )  $\delta$  178.4, 162.3, 158.8, 152.8, 149.2, 141.2, 136.4, 132.7, 132.6, 131.8, 131.1, 128.7, 125.2, 124.6, 124.3, 122.1, 118.4, 117.3, 114.3, 112.9, 107.6, 103.0, 100.8, 54.8, 37.5, 26.4, 21.1, 19.7.

**HRMS-ESI:** calcd. for  $\text{C}_{30}\text{H}_{22}\text{N}_2\text{O}_4\text{Na}$   $[\text{M}+\text{Na}]^+$  : 497.1472; found: 497.1451.

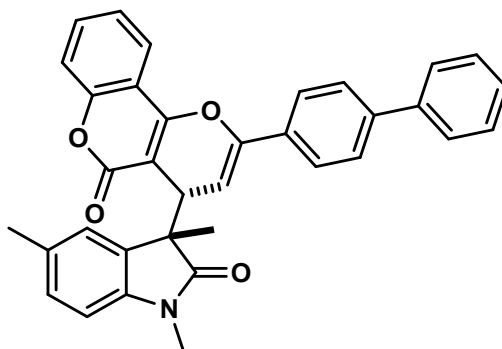

**3-(2-([1,1'-biphenyl]-4-yl)-5-oxo-4H,5H-pyrano[3,2-c]chromen-4-yl)-1,3,5-trimethylindolin-2-one**

**4ch:** 31.5 mg, yellow solid, 60% yield, >20:1 *dr*.

**<sup>1</sup>H NMR** (500 MHz, CDCl<sub>3</sub>) δ 7.86 (d, *J* = 7.8 Hz, 1H), 7.63 (t, *J* = 7.8 Hz, 1H), 7.59 – 7.55 (m, 4H), 7.47 – 7.35 (m, 7H), 6.97 (d, *J* = 7.8 Hz, 1H), 6.70 (s, 1H), 6.63 (d, *J* = 7.8 Hz, 1H), 5.58 (d, *J* = 5.9 Hz, 1H), 4.21 (d, *J* = 5.9 Hz, 1H), 3.25 (s, 3H), 2.07 (s, 3H), 1.49 (s, 3H).

**<sup>13</sup>C NMR** (125 MHz, CDCl<sub>3</sub>) δ 178.7, 162.6, 159.1, 152.8, 150.7, 142.2, 141.3, 140.2, 132.4, 131.7, 131.5, 131.3, 129.0, 128.6, 127.9, 127.3, 127.1, 125.3, 124.5, 124.3, 122.3, 117.1, 114.7, 107.6, 100.9, 99.6, 54.8, 37.6, 26.4, 21.1, 19.7.

**HRMS-ESI:** calcd. for C<sub>35</sub>H<sub>27</sub>NO<sub>4</sub>Na [M+Na]<sup>+</sup> : 548.1832; found: 548.1828.

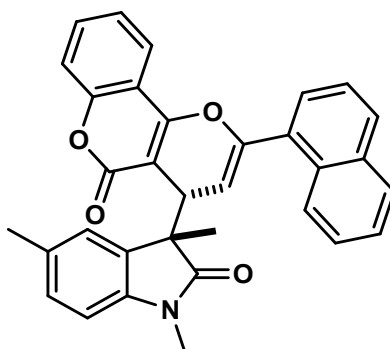

**1,3,5-trimethyl-3-(2-(naphthalen-1-yl)-5-oxo-4H,5H-pyrano[3,2-c]chromen-4-yl)indolin-2-one**

**4ci:** 45.4 mg, yellow solid, 91% yield, >20:1 *dr*.

**<sup>1</sup>H NMR** (500 MHz, CDCl<sub>3</sub>) δ 7.84 (t, *J* = 8.0 Hz, 2H), 7.62 – 7.55 (m, 2H), 7.49 – 7.44 (m, 2H), 7.38 (t, *J* = 7.7 Hz, 1H), 7.33 (t, *J* = 7.6 Hz, 1H), 7.22 (t, *J* = 7.6 Hz, 1H), 7.17 – 7.11 (m, 3H), 6.80 (s, 1H), 6.72 (d, *J* = 7.9 Hz, 1H), 5.39 (d, *J* = 5.8 Hz, 1H), 4.35 (d, *J* = 5.8 Hz, 1H), 3.18 (s, 3H), 2.14 (s, 3H), 1.53 (s, 3H).

**<sup>13</sup>C NMR** (125 MHz, CDCl<sub>3</sub>) δ 178.8, 162.8, 159.8, 152.9, 152.0, 141.7, 133.5, 132.5, 132.1, 132.0, 131.2, 131.0, 130.1, 128.7, 128.4, 127.3, 126.6, 126.3, 125.4, 125.1, 124.44, 124.42, 122.6, 117.0, 114.6, 107.9, 104.8, 100.6, 55.0, 37.7, 26.4, 21.1, 20.7.

**HRMS-ESI:** calcd. for C<sub>33</sub>H<sub>25</sub>NO<sub>4</sub>Na [M+Na]<sup>+</sup> : 522.1676; found: 522.1684.

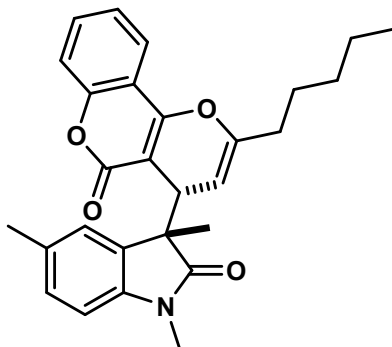

**1,3,5-trimethyl-3-(5-oxo-2-pentyl-4H,5H-pyrano[3,2-c]chromen-4-yl)indolin-2-one**

**4cj:** 23.1 mg, yellow oli, 52% yield, >20:1 *dr*.

**<sup>1</sup>H NMR** (500 MHz, CDCl<sub>3</sub>) δ 7.68 (d, *J* = 7.7 Hz, 1H), 7.59 (t, *J* = 7.7 Hz, 1H), 7.41 (d, *J* = 8.3 Hz, 1H), 7.32 (t, *J* = 7.6 Hz, 1H), 7.03 (d, *J* = 7.8 Hz, 1H), 6.68 (d, *J* = 7.9 Hz, 1H), 6.61 (s, 1H), 4.79 (d, *J* = 5.6 Hz, 1H), 4.01 (d, *J* = 5.6 Hz, 1H), 3.21 (s, 3H), 2.07 (s, 3H), 1.97 – 1.92 (m, 2H), 1.40 (s, 3H), 1.27 – 1.19 (m, 4H), 1.10 – 1.04 (m, 2H), 0.86 (t, *J* = 7.3 Hz, 3H).

**<sup>13</sup>C NMR** (125 MHz, CDCl<sub>3</sub>) δ 178.9, 162.8, 159.3, 153.7, 152.7, 141.5, 132.2, 132.0, 131.6, 128.3, 124.24, 124.20, 122.3, 116.9, 114.6, 107.4, 100.5, 98.8, 54.7, 36.9, 32.1, 30.9, 26.5, 26.2, 22.4, 21.0, 19.9, 13.9.

**HRMS-ESI:** calcd. for C<sub>28</sub>H<sub>29</sub>NO<sub>4</sub>Na [M+Na]<sup>+</sup> : 466.1989; found: 466.1971.

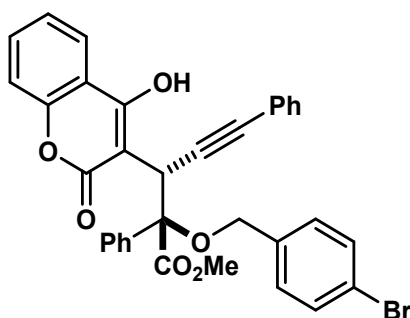

**methyl 2-((4-bromobenzyl)oxy)-3-(4-hydroxy-2-oxo-2H-chromen-3-yl)-2,5-diphenylpent-4-ynoate**

**7a:** 47.2 mg, white solid, 78% yield, >20:1 *dr*.

**<sup>1</sup>H NMR** (500 MHz, CDCl<sub>3</sub>) δ 10.76 (s, 1H), 7.91 – 7.82 (m, 3H), 7.54 (t, *J* = 7.8 Hz, 1H), 7.50 (d, *J* = 8.2 Hz, 2H), 7.46 – 7.41 (m, 3H), 7.37 – 7.26 (m, 9H), 5.36 (s, 1H), 5.12 (d, *J* = 11.4 Hz, 1H), 4.44 (d, *J* = 11.4 Hz, 1H), 3.77 (s, 3H).

**<sup>13</sup>C NMR** (125 MHz, CDCl<sub>3</sub>) δ 170.5, 163.6, 163.0, 152.8, 135.9, 134.9, 132.7, 132.0, 131.8, 129.7, 129.7, 128.7, 128.6, 128.5, 128.0, 124.4, 124.1, 122.9, 122.4, 116.5, 116.4, 102.2, 88.8, 86.1, 84.4, 69.0, 52.7, 40.4.

**HRMS-ESI:** calcd. for C<sub>34</sub>H<sub>25</sub>BrO<sub>6</sub>Na [M+Na]<sup>+</sup> : 631.0727; found: 631.0746.

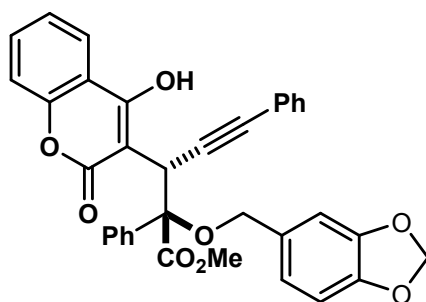

**methyl 2-(benzo[*d*][1,3]dioxol-5-ylmethoxy)-3-(4-hydroxy-2-oxo-2*H*-chromen-3-yl)-2,5-diphenylpent-4-ynoate**

**7b:** 81.5 mg, yellow oil, 71% yield, >20:1 *dr*.

**<sup>1</sup>H NMR** (400 MHz, CDCl<sub>3</sub>) δ 10.95 (s, 1H), 7.92 – 7.86 (m, 3H), 7.54 – 7.50 (m, 1H), 7.46 – 7.41 (m, 3H), 7.37 – 7.33 (m, 2H), 7.31 – 7.28 (m, 3H), 7.27 – 7.23 (m, 2H), 7.00 – 6.97 (m, 1H), 6.94 – 6.91 (m, 1H), 6.82 – 6.78 (m, 1H), 5.99 (s, 2H), 5.35 (s, 1H), 5.05 (d, *J* = 10.6 Hz, 1H), 4.37 (d, *J* = 10.6 Hz, 1H), 3.76 (s, 3H).

**<sup>13</sup>C NMR** (100 MHz, CDCl<sub>3</sub>) δ 170.6, 163.7, 163.1, 152.9, 148.1, 147.8, 135.1, 132.6, 131.9, 130.4, 129.6, 128.6, 128.41, 128.39, 128.1, 124.5, 124.0, 123.1, 122.1, 116.6, 116.4, 108.9, 108.5, 102.3, 101.3, 88.5, 85.9, 84.6, 69.7, 52.6, 40.5.

**HRMS-ESI:** calcd. for C<sub>35</sub>H<sub>26</sub>O<sub>8</sub>Na [M+Na]<sup>+</sup> : 597.1520; found: 597.1531.

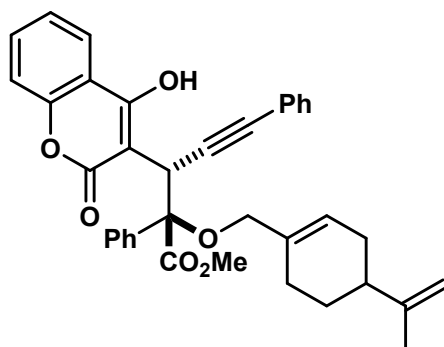

**methyl 3-(4-hydroxy-2-oxo-2*H*-chromen-3-yl)-2,5-diphenyl-2-((4-(prop-1-en-2-yl)cyclohex-1-en-1-yl)methoxy)pent-4-ynoate**

**7c:** 48.2 mg, yellow oil, 42% yield, >20:1 *dr*.

**<sup>1</sup>H NMR** (400 MHz, CDCl<sub>3</sub>) δ 11.28 (s, 1H), 7.98 (d, *J* = 8.0 Hz, 1H), 7.87 – 7.80 (m, 2H), 7.52 (t, *J* = 7.8 Hz, 1H), 7.44 – 7.37 (m, 5H), 7.30 – 7.25 (m, 5H), 5.92 (d, *J* = 14.8 Hz, 1H), 5.31 (s, 1H), 4.74 (s, 2H), 4.52 (t, *J* = 12.2 Hz, 1H), 3.90 – 3.84 (m, 1H), 3.72 (s, 3H), 2.26 – 2.13 (m, 4H), 2.07 – 1.97 (m, 1H), 1.88 – 1.81 (m, 1H), 1.75 (s, 3H), 1.58 – 1.47 (m, 1H).

**<sup>13</sup>C NMR** (100 MHz, CDCl<sub>3</sub>) δ 170.5, 163.6, 163.0, 152.8, 149.5, 135.1, 133.5, 132.5, 131.7, 129.4, 128.40, 128.36, 128.0, 125.8, 125.6, 124.4, 123.9, 123.1, 116.7, 116.3, 108.9, 102.4, 88.2, 85.6, 84.7, 71.5, 52.4, 40.9, 40.7, 30.6, 27.4, 26.5, 20.9.

**HRMS-ESI:** calcd. for C<sub>37</sub>H<sub>34</sub>O<sub>6</sub>Na [M+Na]<sup>+</sup> : 597.2248; found: 597.2235.

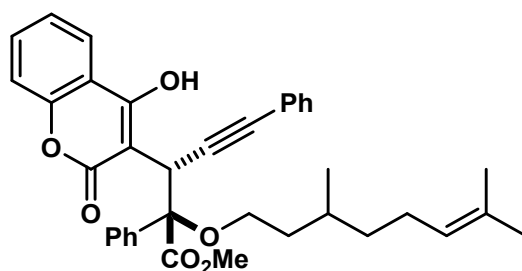

**methyl 2-((3,7-dimethyloct-6-en-1-yl)oxy)-3-(4-hydroxy-2-oxo-2H-chromen-3-yl)-2,5-diphenylpent-4-ynoate**

**7d:** 46.2 mg, yellow oil, 40% yield, 1:1 *dr*.

**<sup>1</sup>H NMR** (400 MHz, CDCl<sub>3</sub>) (two diastereomers) δ 11.32 (s, 1H), 11.29 (s, 1H), 8.00 – 7.96 (m, 2H), 7.84 – 7.80 (m, 4H), 7.55 – 7.51 (m, 2H), 7.44 – 7.41 (m, 6H), 7.40 – 7.37 (m, 4H), 7.31 – 7.28 (m, 6H), 7.28 – 7.26 (m, 3H), 5.30 – 5.28 (m, 2H), 5.10 – 5.04 (m, 2H), 4.08 – 4.01 (m, 2H), 3.72 (s, 6H), 3.55 – 3.46 (m, 2H), 2.00 – 1.81 (m, 6H), 1.68 – 1.63 (m, 9H), 1.58 (t, *J* = 5.3 Hz, 8H), 1.37 – 1.31 (m, 2H), 1.21 – 1.14 (m, 2H), 0.91 (d, *J* = 6.4 Hz, 3H), 0.85 (d, *J* = 6.5 Hz, 3H).

**<sup>13</sup>C NMR** (100 MHz, CDCl<sub>3</sub>) (two diastereomers) δ 170.46, 170.43, 163.75, 163.05, 152.88, 135.38, 132.52, 131.80, 131.78, 131.38, 129.39, 129.37, 128.41, 128.36, 128.02, 124.73, 124.70, 124.43, 123.94, 123.19, 116.71, 116.37, 102.40, 88.29, 88.15, 85.64, 85.62, 84.64, 84.59, 66.79, 66.58, 52.42, 40.57, 40.51, 37.30, 37.21, 37.00, 36.83, 29.81, 29.59, 29.40, 25.79, 25.56, 25.54, 19.74, 19.53, 17.75.

**HRMS-ESI:** calcd. for C<sub>37</sub>H<sub>38</sub>O<sub>6</sub>Na [M+Na]<sup>+</sup> : 601.2561; found: 601.2587.

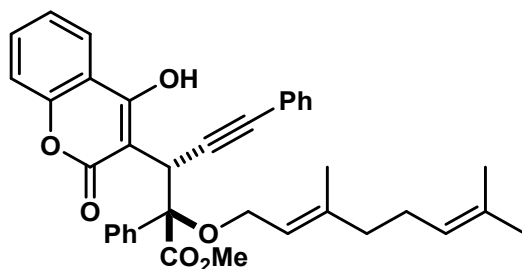

**methyl (*E*)-2-((3,7-dimethylocta-2,6-dien-1-yl)oxy)-3-(4-hydroxy-2-oxo-2H-chromen-3-yl)-2,5-diphenylpent-4-ynoate**

**7e:** 58.8 mg, yellow oil, 51% yield, >20:1 *dr*.

**<sup>1</sup>H NMR** (400 MHz, CDCl<sub>3</sub>) δ 11.37 (s, 1H), 7.97 (dd, *J* = 8.1, 1.5 Hz, 1H), 7.88 – 7.82 (m, 2H), 7.56 – 7.50 (m, 1H), 7.46 – 7.40 (m, 3H), 7.38 – 7.35 (m, 2H), 7.30 – 7.25 (m, 5H), 5.56 (t, *J* = 6.9 Hz, 1H), 5.29 (s, 1H), 5.15 (t, *J* = 6.0 Hz, 1H), 4.61 – 4.53 (m, 1H), 4.04 – 3.96 (m, 1H), 3.74 (s, 3H), 2.22 – 2.10 (m, 4H), 1.70 – 1.67 (m, 6H), 1.63 (s, 3H).

**<sup>13</sup>C NMR** (100 MHz, CDCl<sub>3</sub>) δ 170.5, 163.9, 163.1, 152.9, 143.7, 135.3, 132.5, 131.9, 131.8, 129.3, 128.4, 128.32, 128.27, 128.0, 124.4, 123.9, 123.3, 118.9, 116.8, 116.3, 102.2, 88.2, 85.5, 84.6, 64.8, 52.5, 40.8, 39.8, 26.6, 25.8, 17.8, 16.7.

**HRMS-ESI:** calcd. for C<sub>37</sub>H<sub>36</sub>O<sub>6</sub>Na [M+Na]<sup>+</sup> : 599.2404; found: 599.2432.

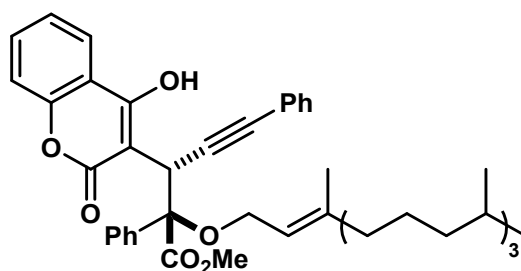

**methyl (*E*)-3-(4-hydroxy-2-oxo-2H-chromen-3-yl)-2,5-diphenyl-2-((3,7,11,15-tetramethylhexadec-2-en-1-yl)oxy)pent-4-ynoate**

**7f:** 93.3 mg, yellow oil, 65% yield, >20:1 *dr*.

**<sup>1</sup>H NMR** (500 MHz, CDCl<sub>3</sub>) δ 11.40 (s, 1H), 7.97 (d, *J* = 8.2 Hz, 1H), 7.87 – 7.83 (m, 2H), 7.54 (t, *J* = 7.8 Hz, 1H), 7.45 – 7.41 (m, 3H), 7.38 – 7.35 (m, 2H), 7.30 – 7.26 (m, 5H), 5.55 (t, *J* = 7.0 Hz, 1H), 5.28 (s, 1H), 4.57 (t, *J* = 8.8 Hz, 1H), 3.99 (t, *J* = 7.8 Hz, 1H), 3.74 (s, 3H), 2.13 – 2.05 (m, 2H), 1.69 (s, 3H), 1.54 – 1.48 (m, 2H), 1.44 – 1.39 (m, 2H), 1.36 – 1.32 (m, 2H), 1.31 – 1.27 (m, 3H), 1.26 – 1.19 (m, 4H), 1.16 – 1.11 (m, 3H), 1.09 – 1.02 (m, 3H), 0.88 – 0.83 (m, 12H).

**<sup>13</sup>C NMR** (125 MHz, CDCl<sub>3</sub>) δ 170.5, 164.0, 163.2, 152.9, 144.33, 144.27, 135.3, 132.5, 131.8, 129.3, 128.4, 128.33, 128.28, 128.0, 124.5, 123.9, 123.3, 118.6, 116.9, 116.4, 102.2, 88.2, 85.5, 84.6, 64.8, 52.5, 40.8, 40.1, 39.5, 37.60, 37.55, 37.4, 36.8, 32.94, 32.91, 28.1, 25.4, 24.9, 24.7, 22.9, 22.8, 19.9, 19.8, 16.6.

**HRMS-ESI:** calcd. for C<sub>47</sub>H<sub>58</sub>O<sub>6</sub>Na [M+Na]<sup>+</sup>: 741.4126; found: 741.4047.

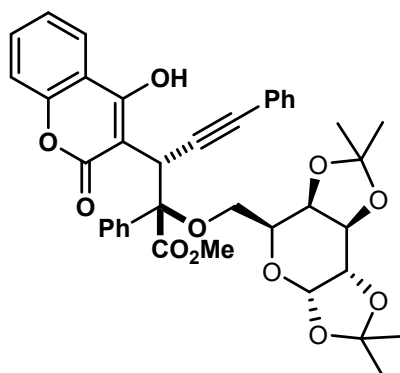

**methyl 3-(4-hydroxy-2-oxo-2H-chromen-3-yl)-2,5-diphenyl-2-(((3a*S*,5*S*,5a*R*,8a*R*,8b*S*)-2,2,7,7-tetramethyltetrahydro-5*H*-bis([1,3]dioxolo)[4,5-*b*:4',5'-*d*]pyran-5-yl)methoxy)pent-4-ynoate**

**7g:** 99.6 mg, yellow oil, 73% yield, 77:23 *dr*.

**<sup>1</sup>H NMR** (400 MHz, CDCl<sub>3</sub>) (two diastereomers) δ 10.85 (s, 1H), 10.70 (s, 1H), 8.03 (d, *J* = 7.8 Hz, 1H), 7.99 (d, *J* = 7.8 Hz, 1H), 7.89 – 7.82 (m, 3H), 7.55 – 7.50 (m, 1H), 7.44 – 7.38 (m, 7H), 7.31 – 7.27 (m, 3H), 7.26 – 7.23 (m, 3H), 5.63 – 5.59 (m, 1H), 5.30 (s, 1H), 5.24 (s, 1H), 4.60 – 4.55 (m, 1H), 4.36 – 4.30 (m, 3H), 4.28 – 4.23 (m, 1H), 4.19 – 4.14 (m, 2H), 3.76 (s, 1H), 3.73 (s, 3H), 3.66 – 3.60 (m, 1H), 1.42 – 1.40 (m, 3H), 1.40 – 1.39 (m, 1H), 1.37 – 1.35 (m, 3H), 1.35 – 1.33 (m, 1H), 1.33 – 1.32 (m, 1H), 1.31 – 1.30 (m, 3H), 1.28 – 1.27 (m, 1H), 1.25 – 1.24 (m, 3H).

**<sup>13</sup>C NMR** (100 MHz, CDCl<sub>3</sub>) (two diastereomers) δ 170.4, 170.2, 163.9, 163.7, 163.2, 163.1, 152.9, 152.8, 135.20, 135.15, 132.5, 132.0, 129.4, 129.3, 128.43, 128.38, 128.33, 128.28, 128.22, 128.19, 128.16, 128.1, 124.8, 123.8, 123.7, 123.2, 116.8, 116.3, 109.6, 108.8, 102.2, 102.0, 96.4, 89.3, 88.7, 86.0, 85.6, 84.4, 84.1, 71.5, 71.1, 70.94, 70.85, 70.6, 70.5, 68.0, 67.4, 67.1, 66.6, 52.5, 40.9, 40.6, 29.8, 26.1, 25.9, 25.2, 25.1, 24.5, 24.4.



HRMS-ESI: calcd. for C<sub>39</sub>H<sub>38</sub>O<sub>11</sub>Na [M+Na]<sup>+</sup> : 705.2306; found: 705.2326.

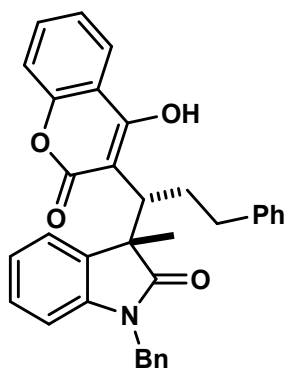

**1-benzyl-3-(1-(4-hydroxy-2-oxo-2H-chromen-3-yl)-3-phenylpropyl)-3-methylindolin-2-one**

**8:** 43.8 mg, white solid, 85% yield, >20:1 *dr*.

<sup>1</sup>H NMR (500 MHz, CDCl<sub>3</sub>) δ 9.16 (s, 1H), 7.82 (d, *J* = 7.9 Hz, 1H), 7.55 (d, *J* = 7.2 Hz, 1H), 7.48 (t, *J* = 7.7 Hz, 1H), 7.36 – 7.27 (m, 3H), 7.22 – 7.15 (m, 4H), 7.12 – 7.04 (m, 3H), 7.01 – 6.96 (m, 2H), 6.89 – 6.84 (m, 2H), 6.57 (d, *J* = 7.2 Hz, 1H), 5.13 (d, *J* = 15.7 Hz, 1H), 4.64 (d, *J* = 15.7 Hz, 1H), 4.21 (dd, *J* = 12.2, 3.7 Hz, 1H), 3.02 – 2.91 (m, 1H), 2.65 – 2.57 (m, 1H), 2.53 – 2.42 (m, 2H), 1.55 (s, 3H).

<sup>13</sup>C NMR (125 MHz, CDCl<sub>3</sub>) δ 185.5, 164.3, 152.7, 141.9, 140.7, 134.8, 133.8, 132.1, 129.1, 128.8, 128.6, 128.5, 128.1, 127.7, 127.3, 126.9, 126.1, 124.9, 124.1, 123.8, 116.6, 116.2, 109.7, 104.0, 52.3, 44.1, 41.8, 34.7, 28.7, 25.1.

HRMS-ESI: calcd. for C<sub>34</sub>H<sub>29</sub>NO<sub>4</sub>Na [M+Na]<sup>+</sup> : 538.1989; found: 538.1991.

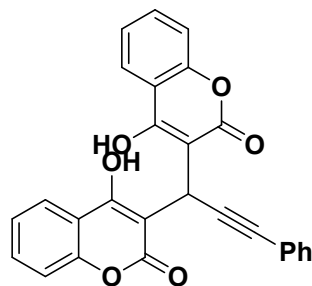

**3,3'-(3-phenylprop-2-yne-1,1-diyl)bis(4-hydroxy-2H-chromen-2-one)**

**9:** 21.8 mg, light yellow solid, 50% yield.

<sup>1</sup>H NMR (400 MHz, DMSO) δ 7.95 (dd, *J* = 8.1, 1.5 Hz, 2H), 7.59 – 7.54 (m, 2H), 7.38 – 7.34 (m, 2H), 7.34 – 7.27 (m, 7H), 6.16 (s, 1H).

<sup>13</sup>C NMR (100 MHz, DMSO) δ 166.2, 163.6, 152.3, 131.9, 131.5, 128.6, 128.0, 124.2, 123.7, 123.4, 118.7, 115.9, 102.4, 89.8, 78.9, 23.6.

HRMS-ESI: calcd. for C<sub>27</sub>H<sub>16</sub>O<sub>6</sub> [M+Na]<sup>+</sup> : 459.0839; found: 459.0858.

## 9. NMR spectra of products

$^1\text{H}$  NMR (500 MHz,  $\text{CDCl}_3$ ) and  $^{13}\text{C}$  NMR (125 MHz,  $\text{CDCl}_3$ ) spectra for 4aa

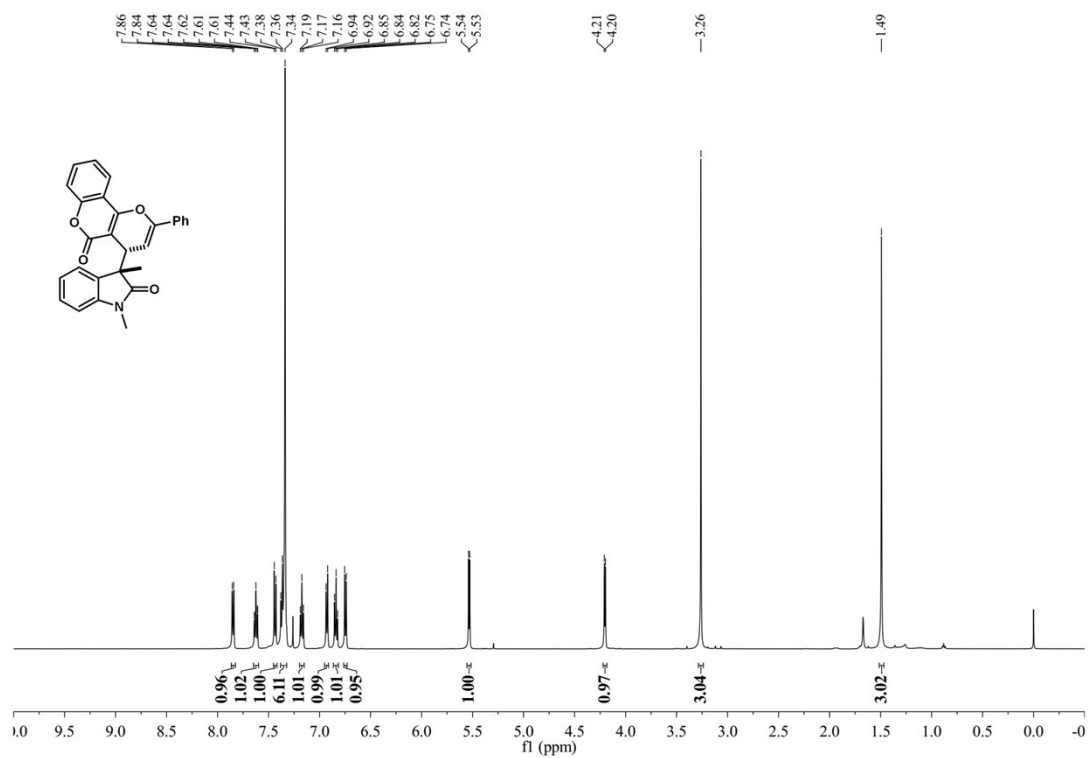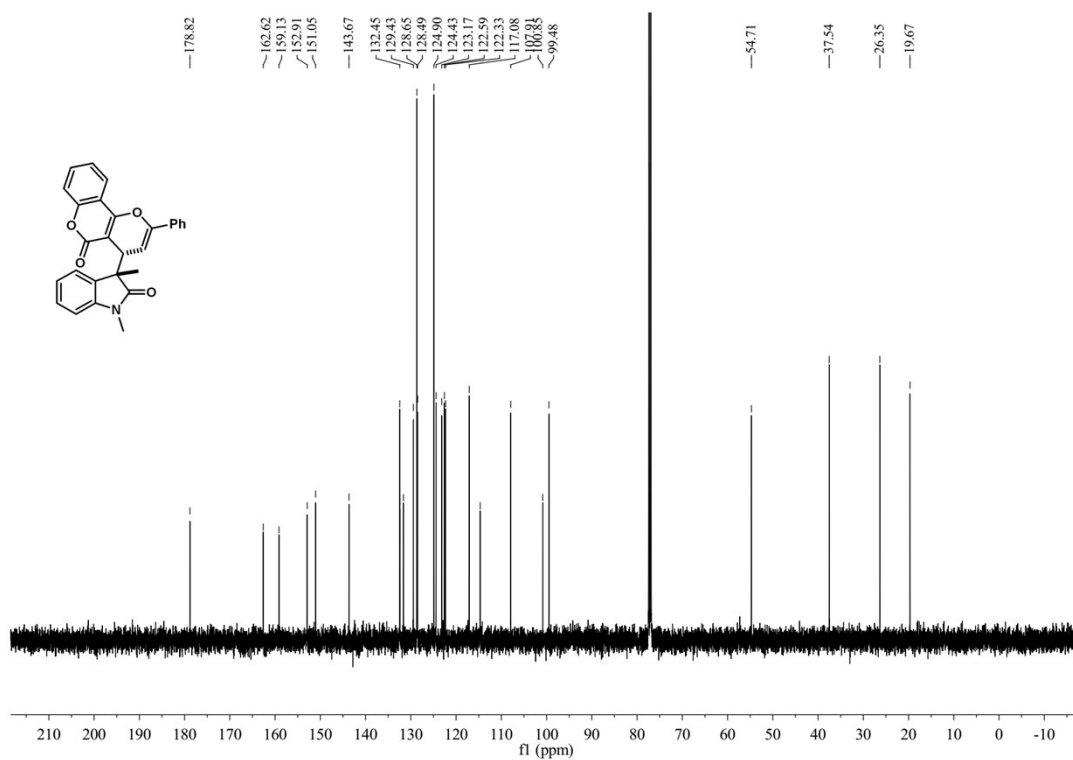

**<sup>1</sup>H NMR (500 MHz, CDCl<sub>3</sub>) and <sup>13</sup>C NMR (125 MHz, CDCl<sub>3</sub>) spectra for 4ab**

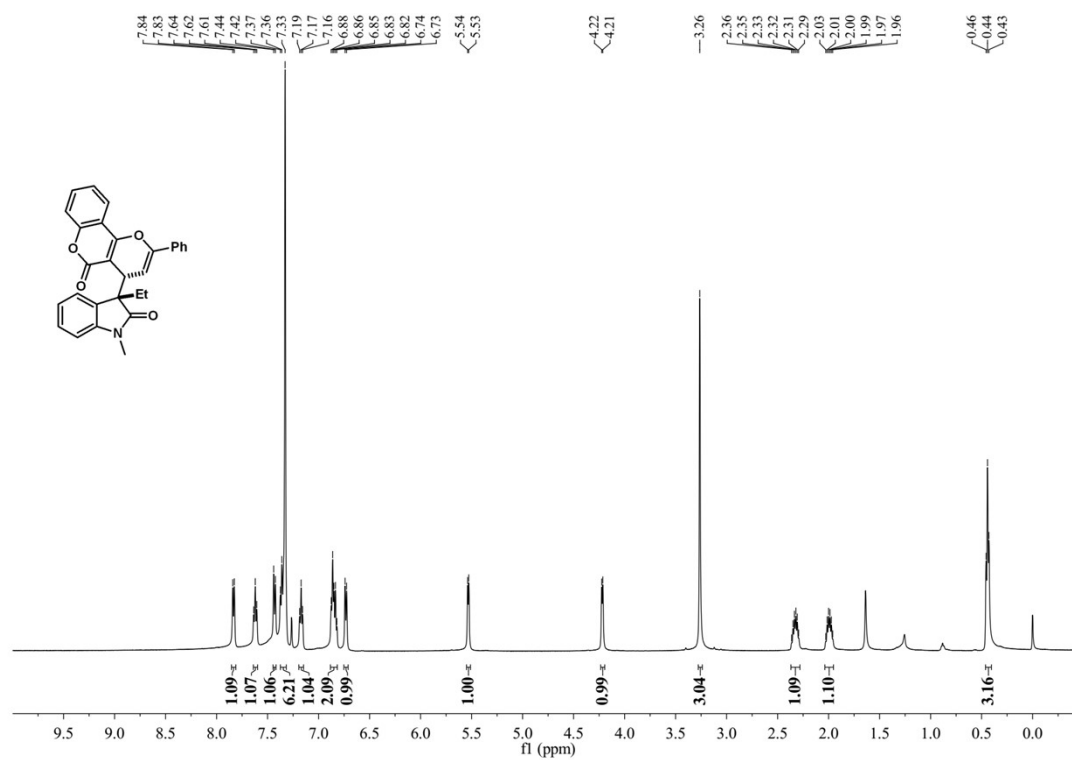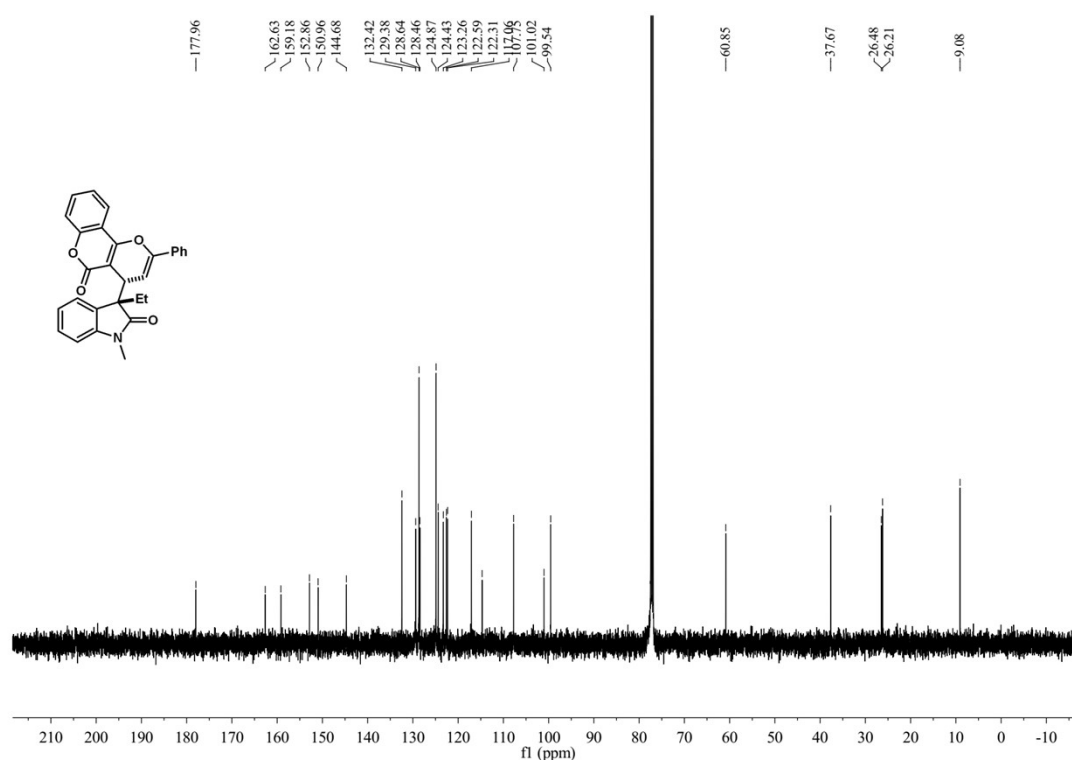

**<sup>1</sup>H NMR (500 MHz, CDCl<sub>3</sub>) and <sup>13</sup>C NMR (125 MHz, CDCl<sub>3</sub>) spectra for 4ac**

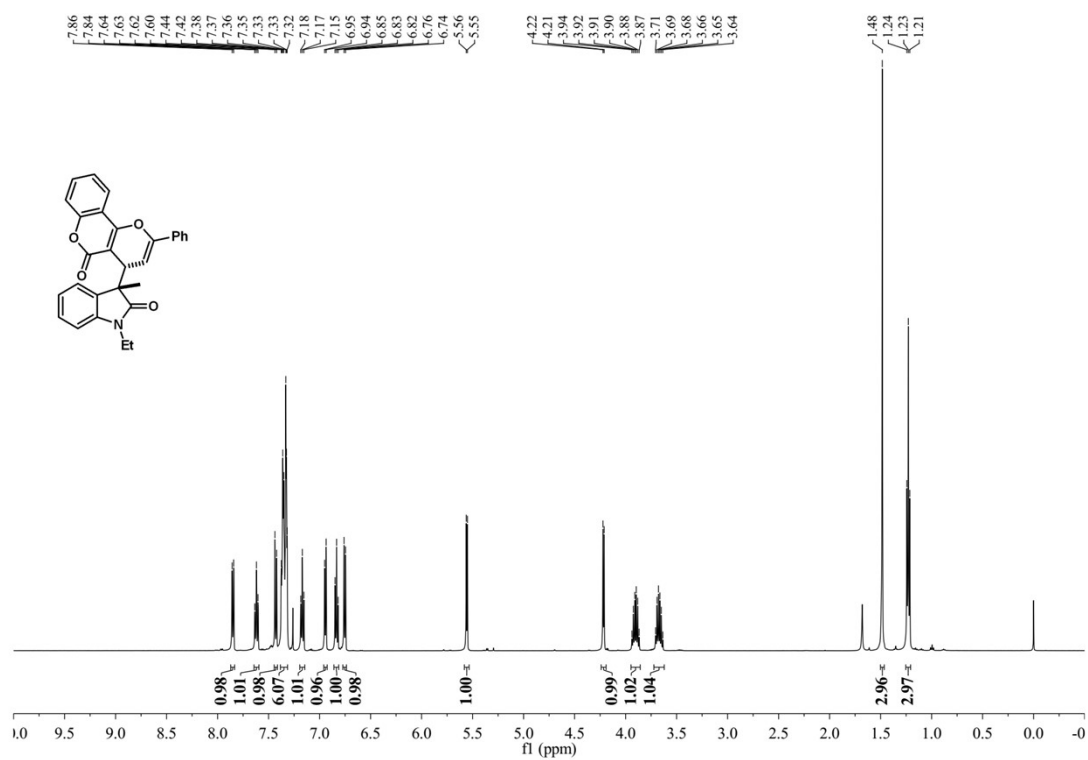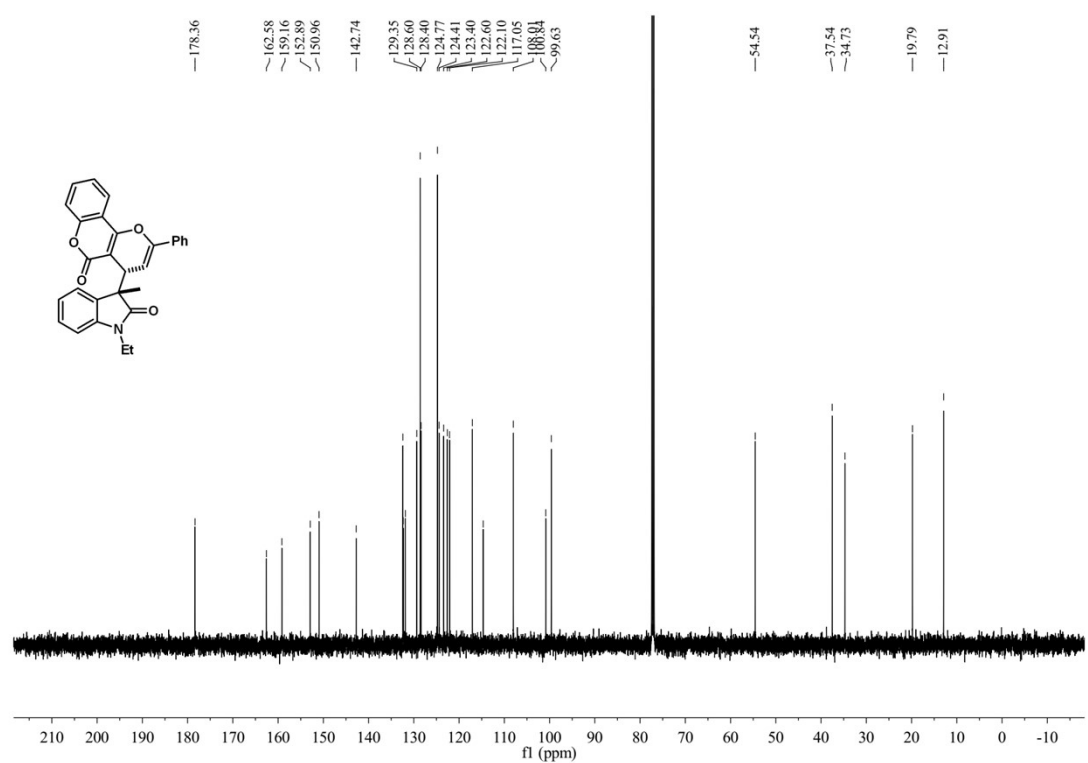

**<sup>1</sup>H NMR (500 MHz, CDCl<sub>3</sub>) and <sup>13</sup>C NMR (125 MHz, CDCl<sub>3</sub>) spectra for 4ad**

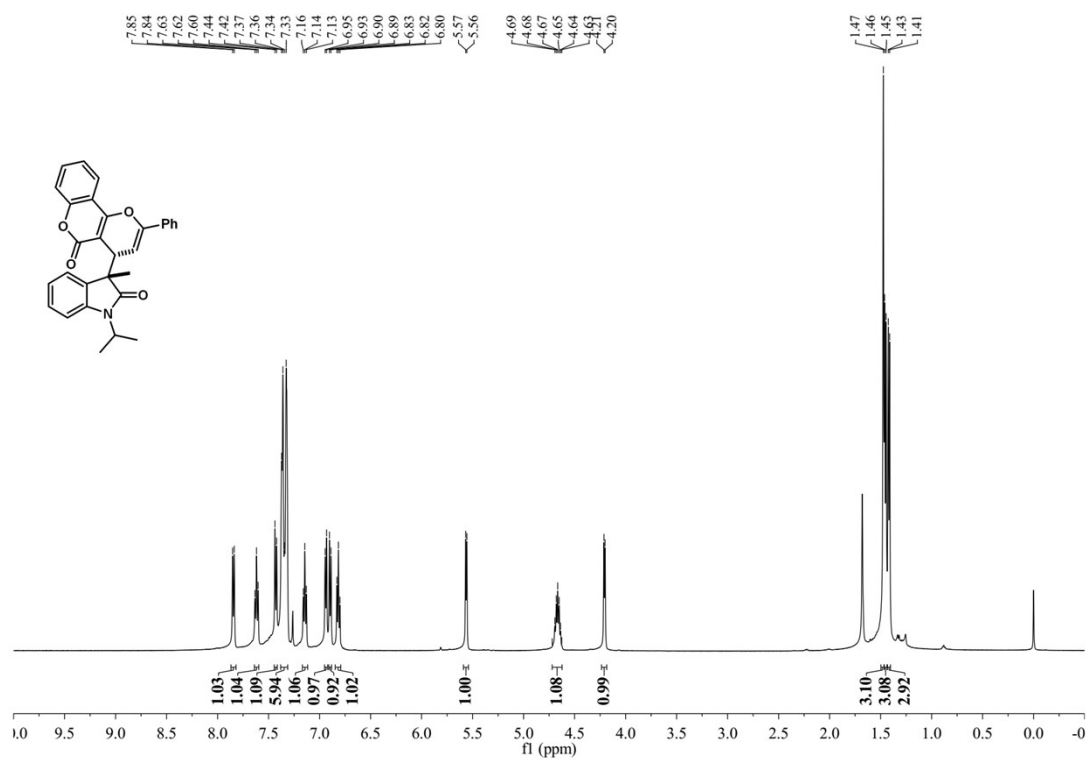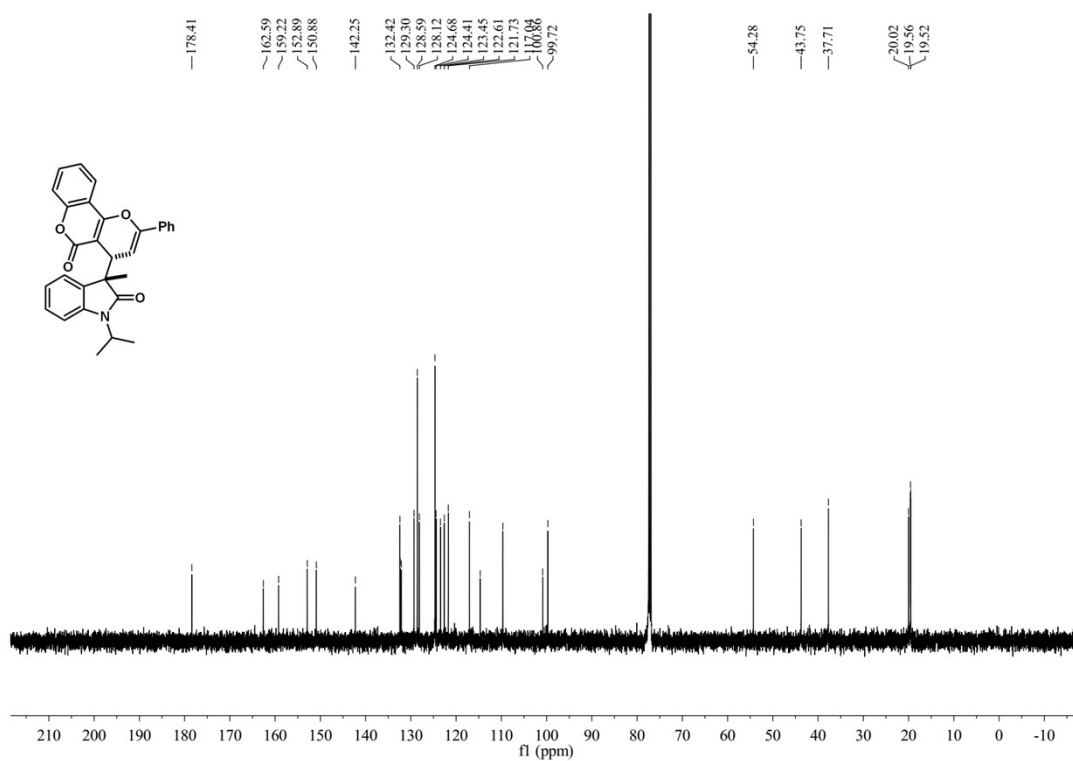

<sup>1</sup>H NMR (500 MHz, CDCl<sub>3</sub>) and <sup>13</sup>C NMR (125 MHz, CDCl<sub>3</sub>) spectra for 4ae

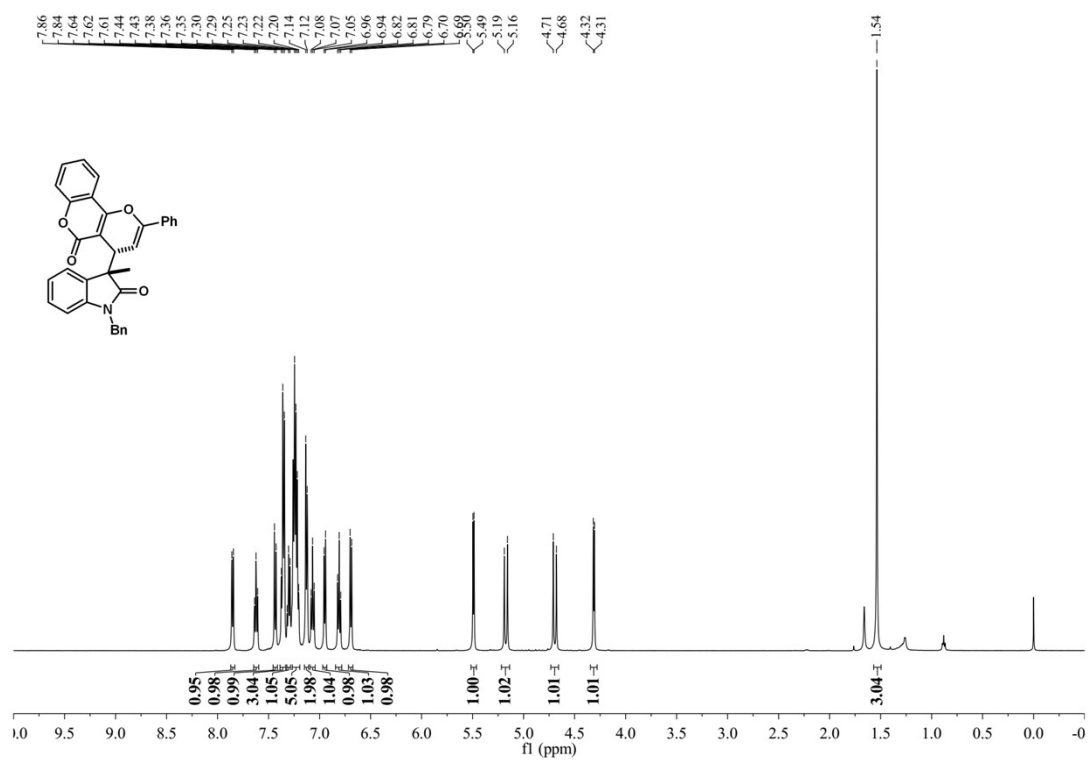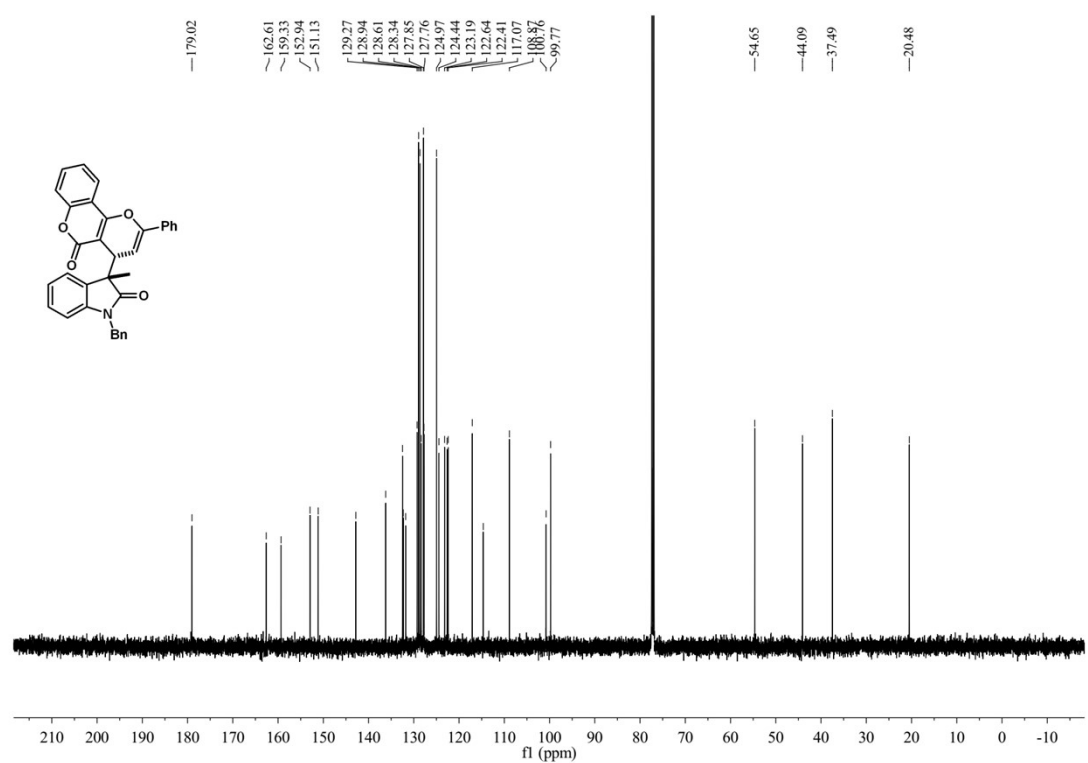

**<sup>1</sup>H NMR (500 MHz, CDCl<sub>3</sub>) and <sup>13</sup>C NMR (125 MHz, CDCl<sub>3</sub>) spectra for 4af**

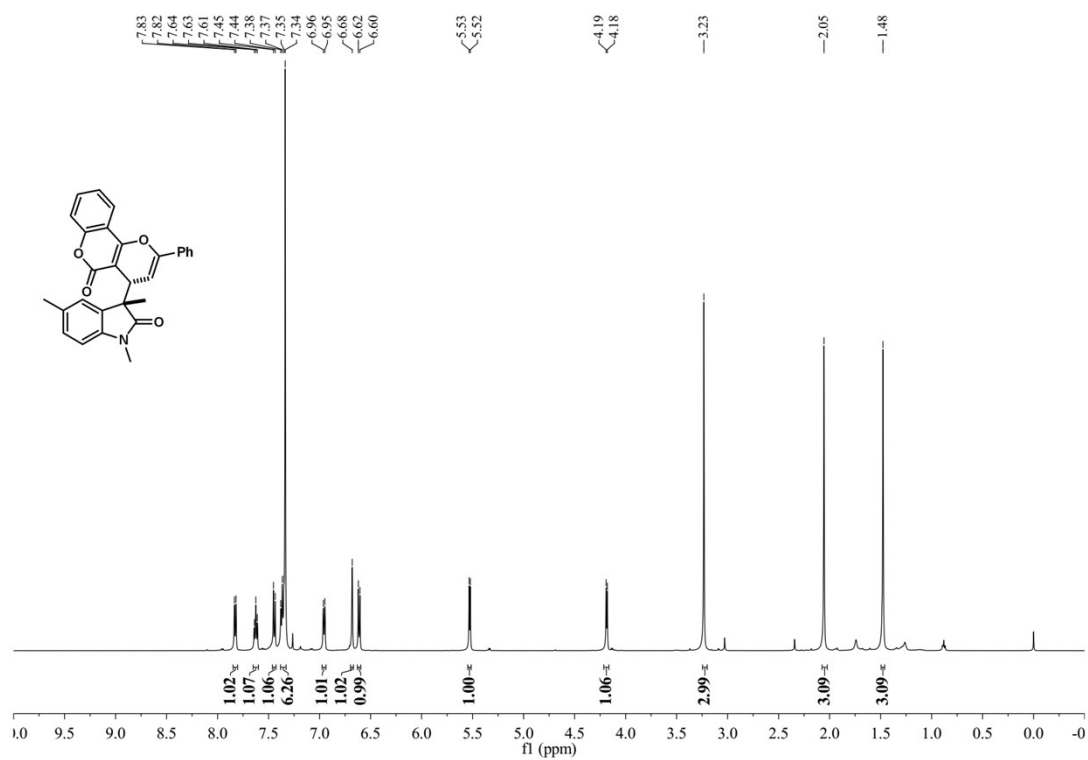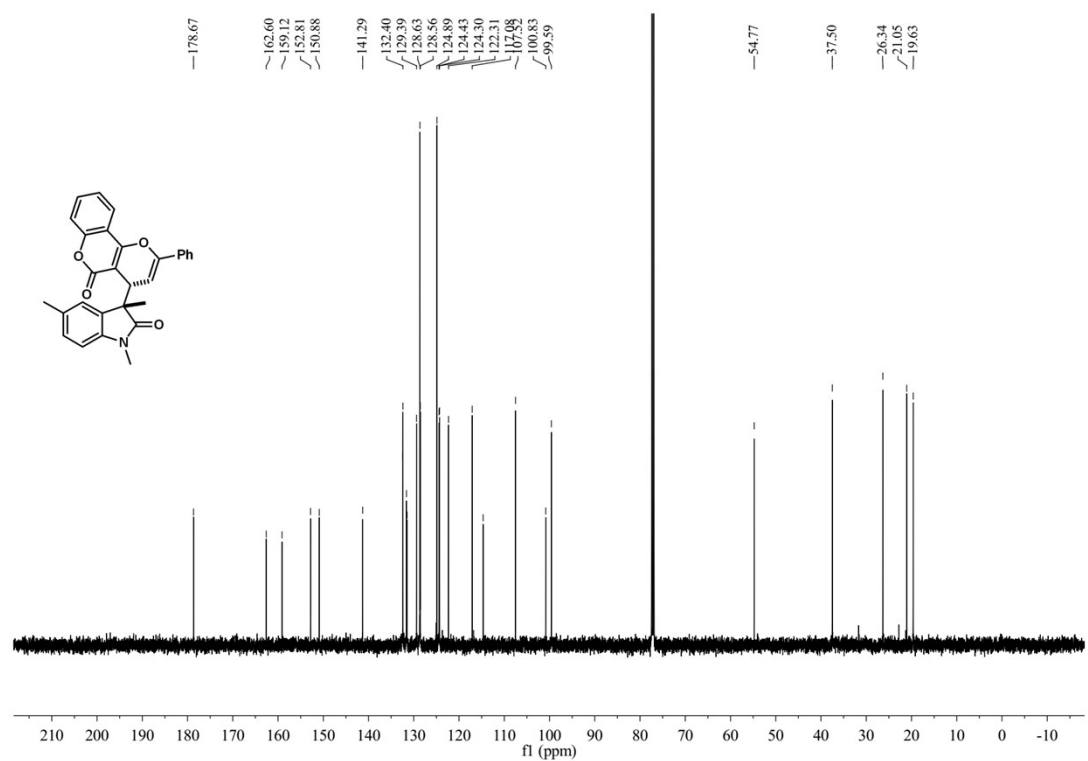

**<sup>1</sup>H NMR (500 MHz, CDCl<sub>3</sub>) and <sup>13</sup>C NMR (125 MHz, CDCl<sub>3</sub>) spectra for 4ag**

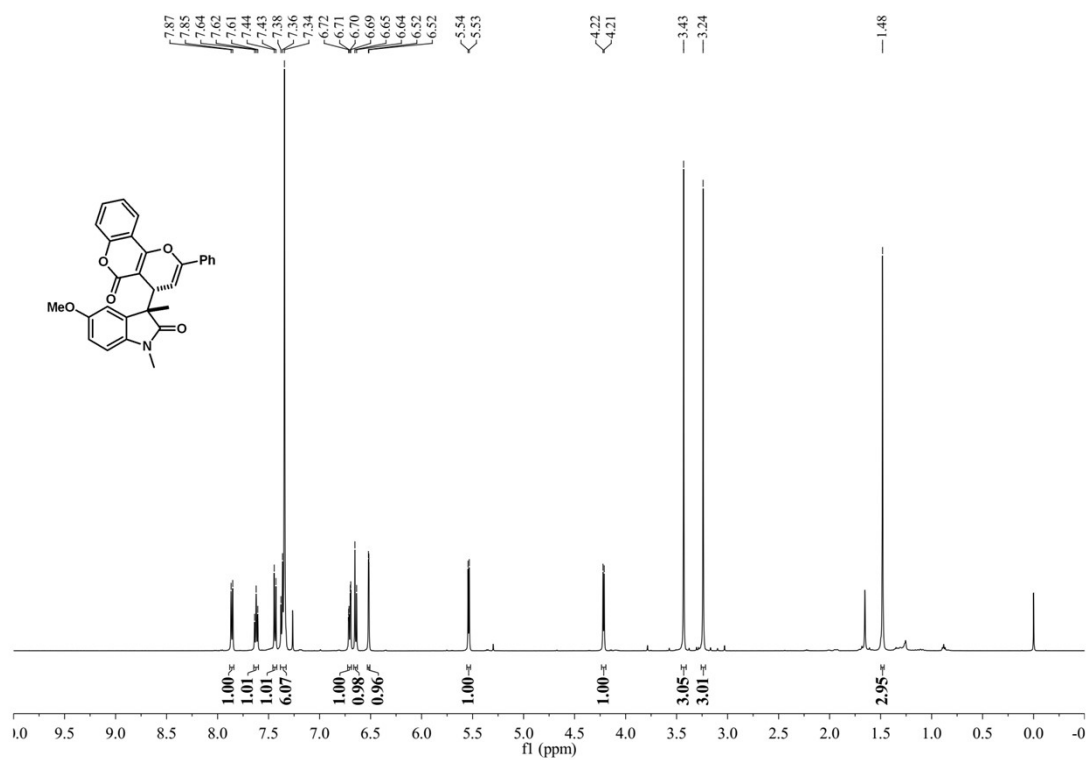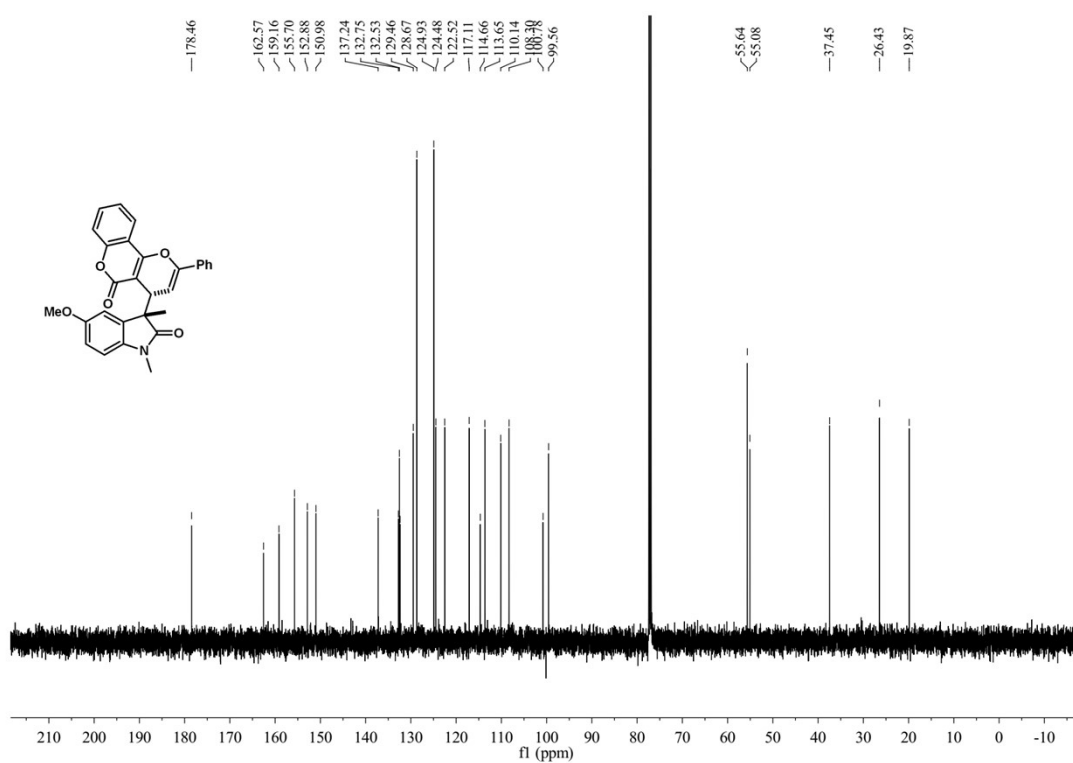



<sup>1</sup>H NMR (500 MHz, CDCl<sub>3</sub>) and <sup>13</sup>C NMR (125 MHz, CDCl<sub>3</sub>) spectra for 4ah

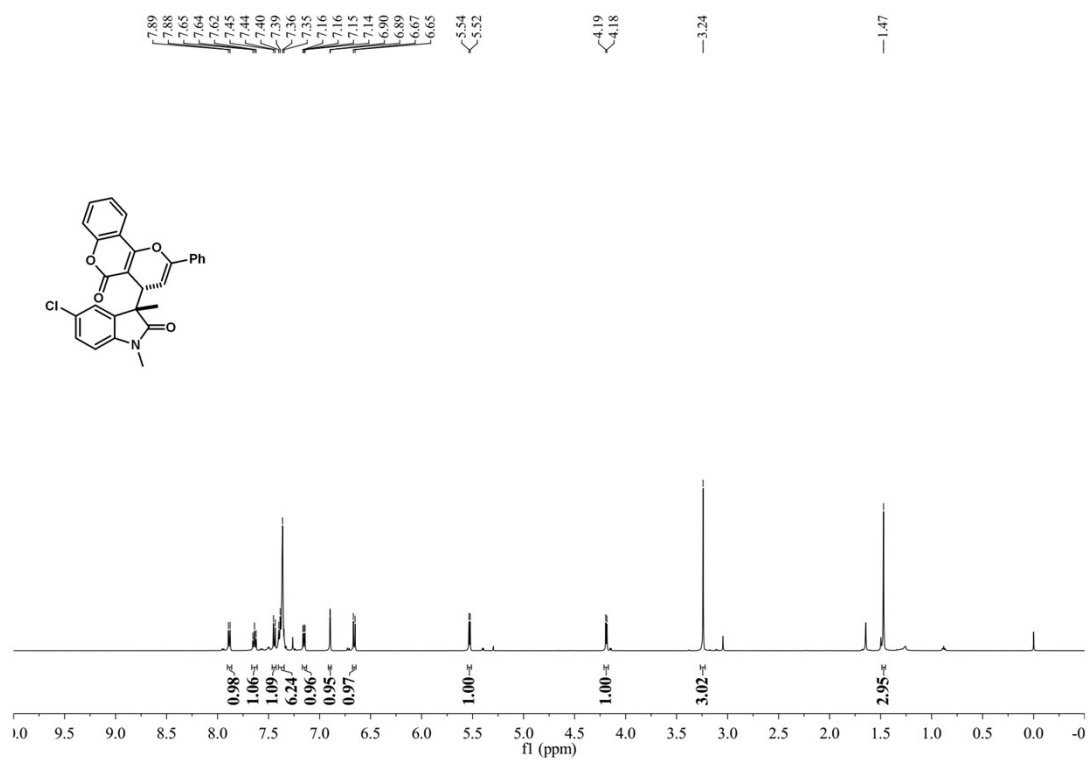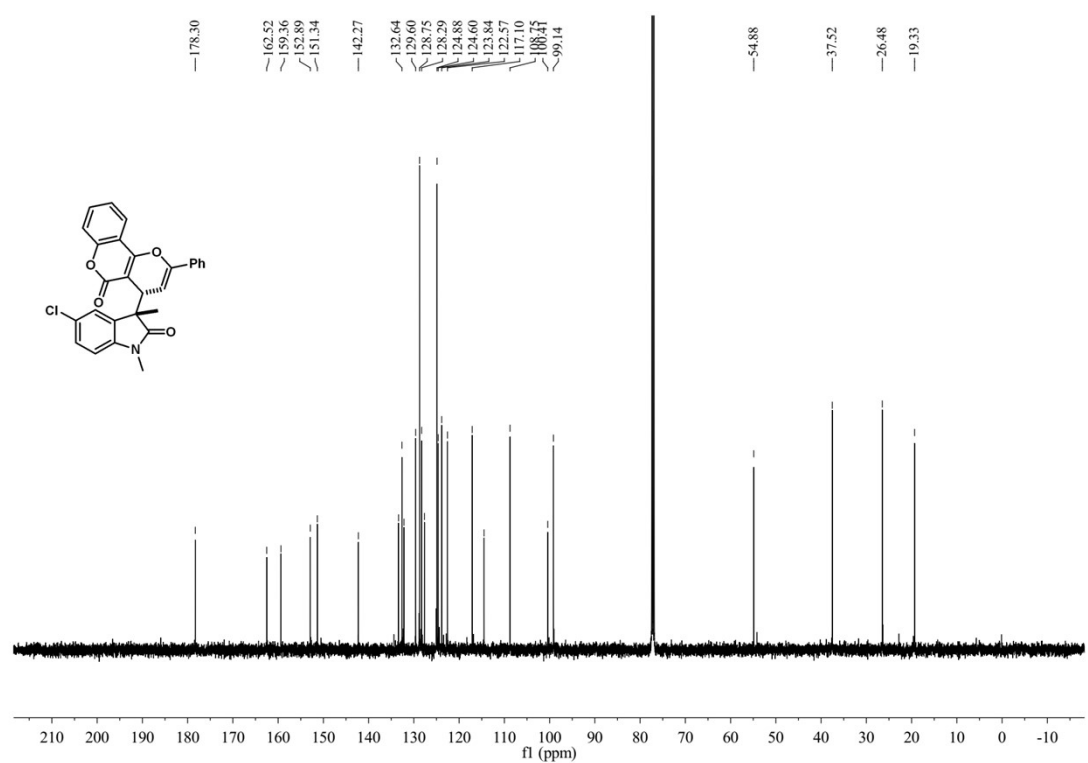

<sup>1</sup>H NMR (500 MHz, CDCl<sub>3</sub>) and <sup>13</sup>C NMR (125 MHz, CDCl<sub>3</sub>) spectra for 4ba

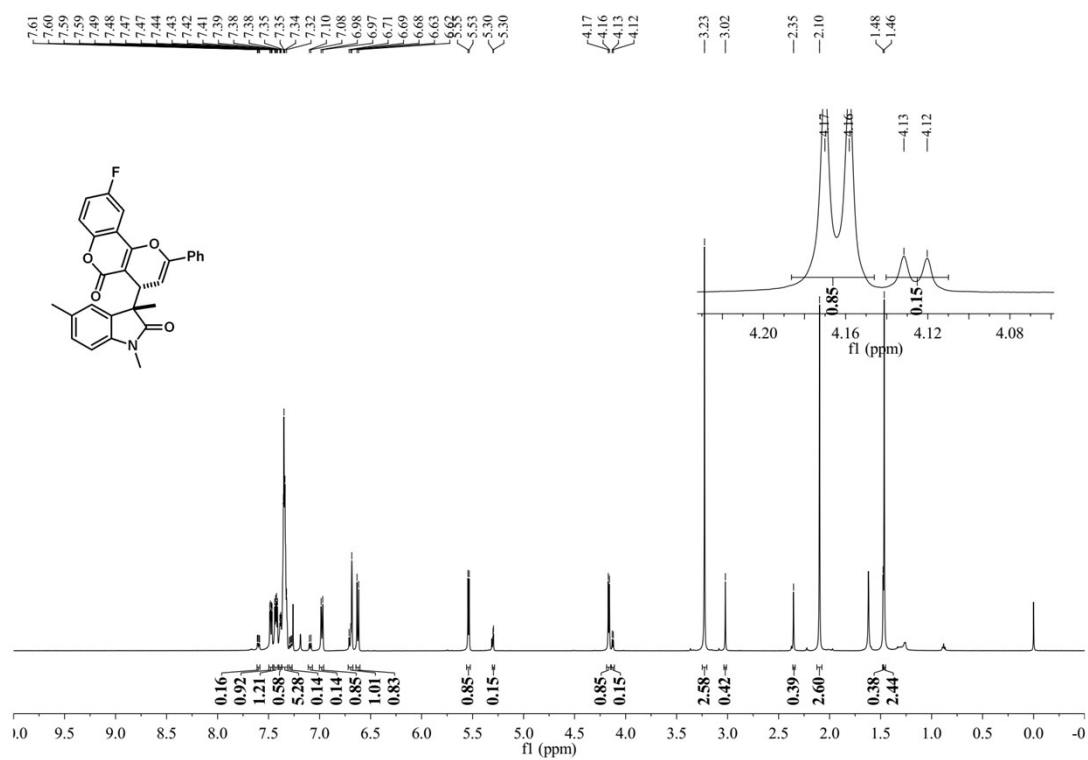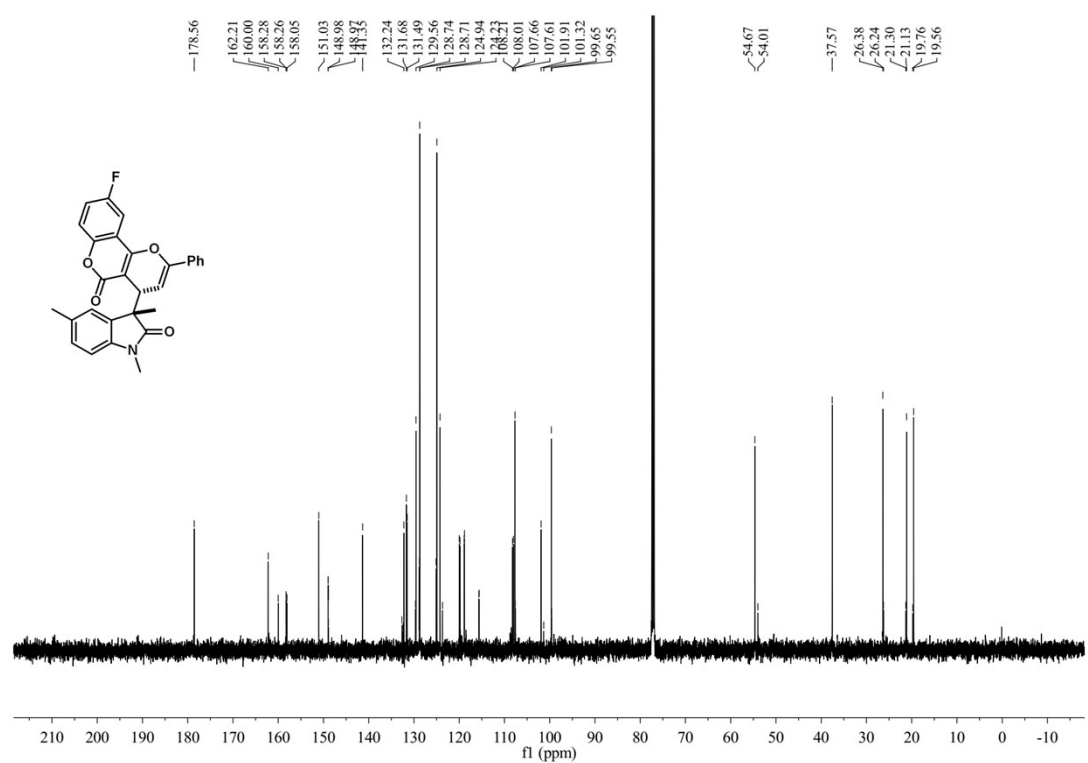

**<sup>19</sup>F NMR (376 MHz, CDCl<sub>3</sub>) spectra for 4ba**

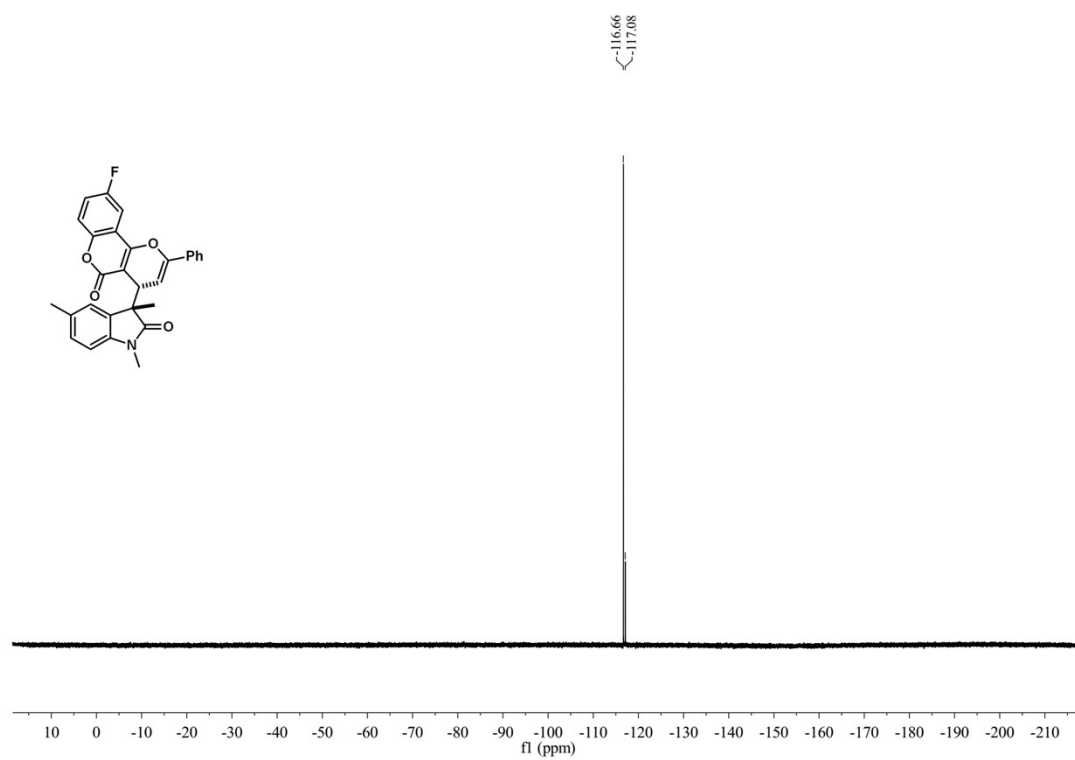

**<sup>1</sup>H NMR (500 MHz, CDCl<sub>3</sub>) and <sup>13</sup>C NMR (125 MHz, CDCl<sub>3</sub>) spectra for 4bb**

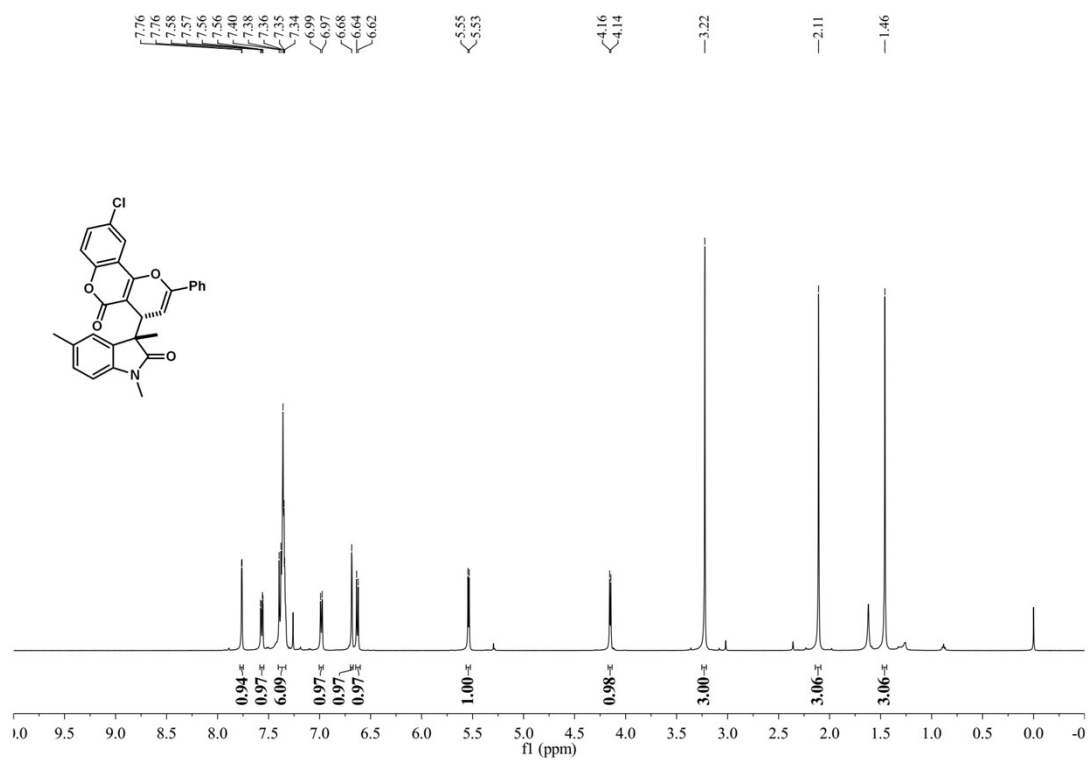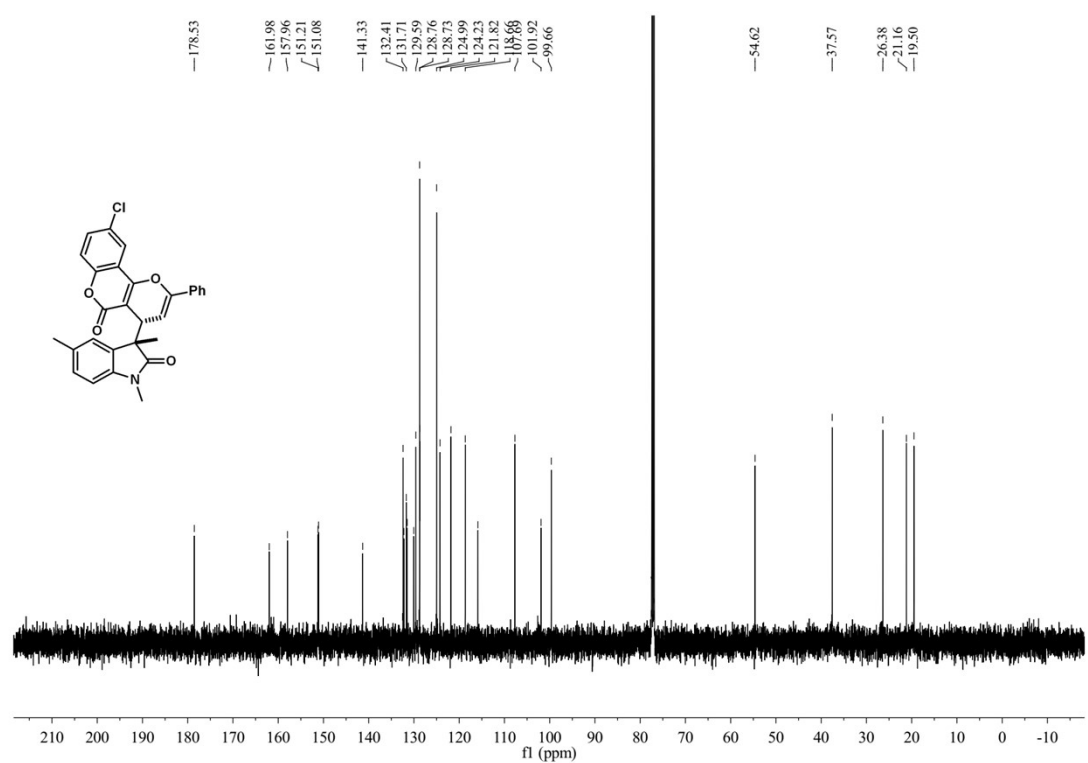

<sup>1</sup>H NMR (500 MHz, CDCl<sub>3</sub>) and <sup>13</sup>C NMR (125 MHz, CDCl<sub>3</sub>) spectra for 4bc

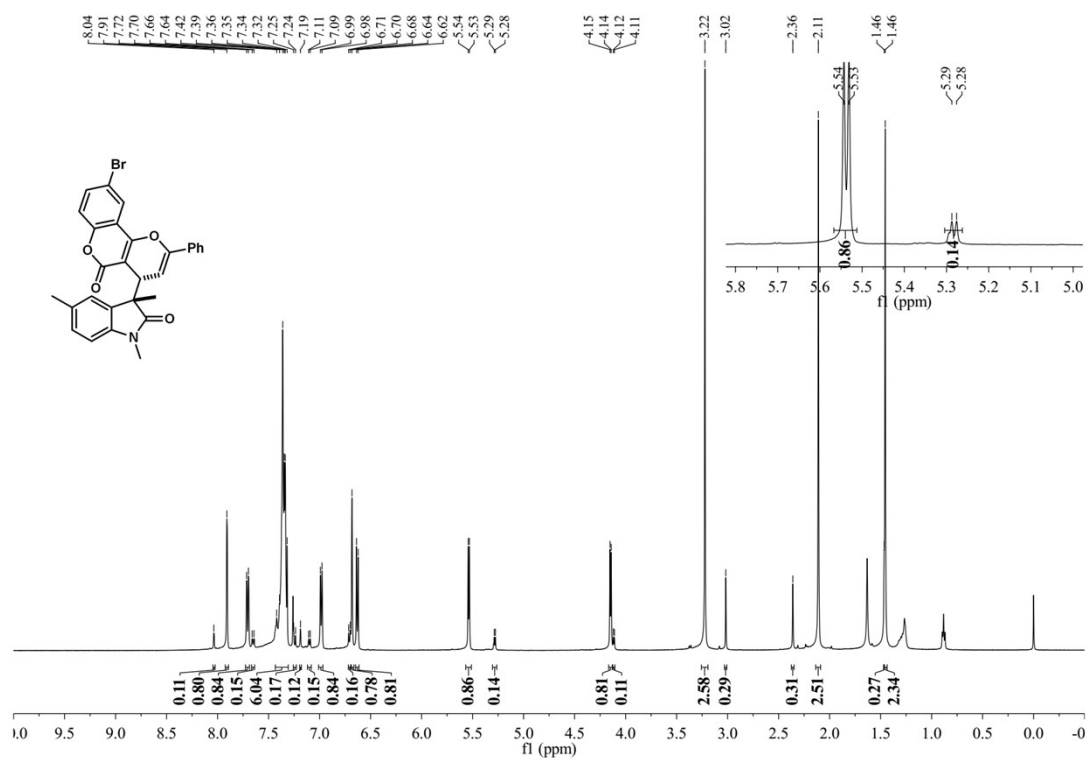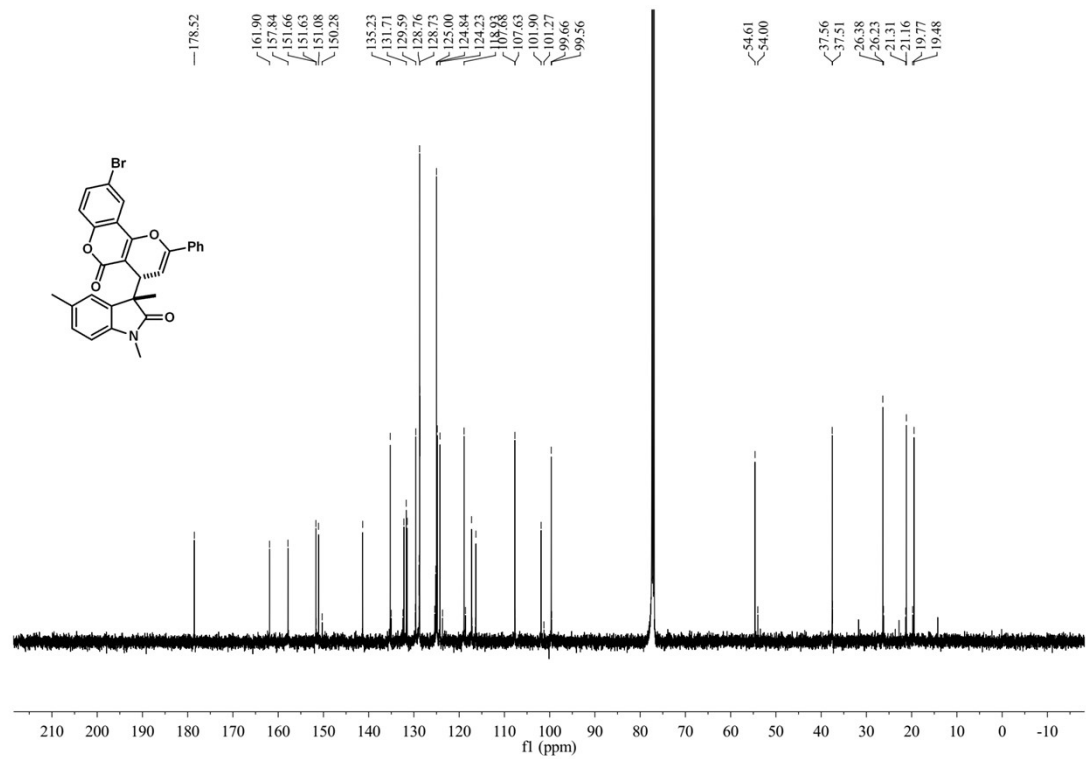

**<sup>1</sup>H NMR (500 MHz, CDCl<sub>3</sub>) and <sup>13</sup>C NMR (125 MHz, CDCl<sub>3</sub>) spectra for 4bd**

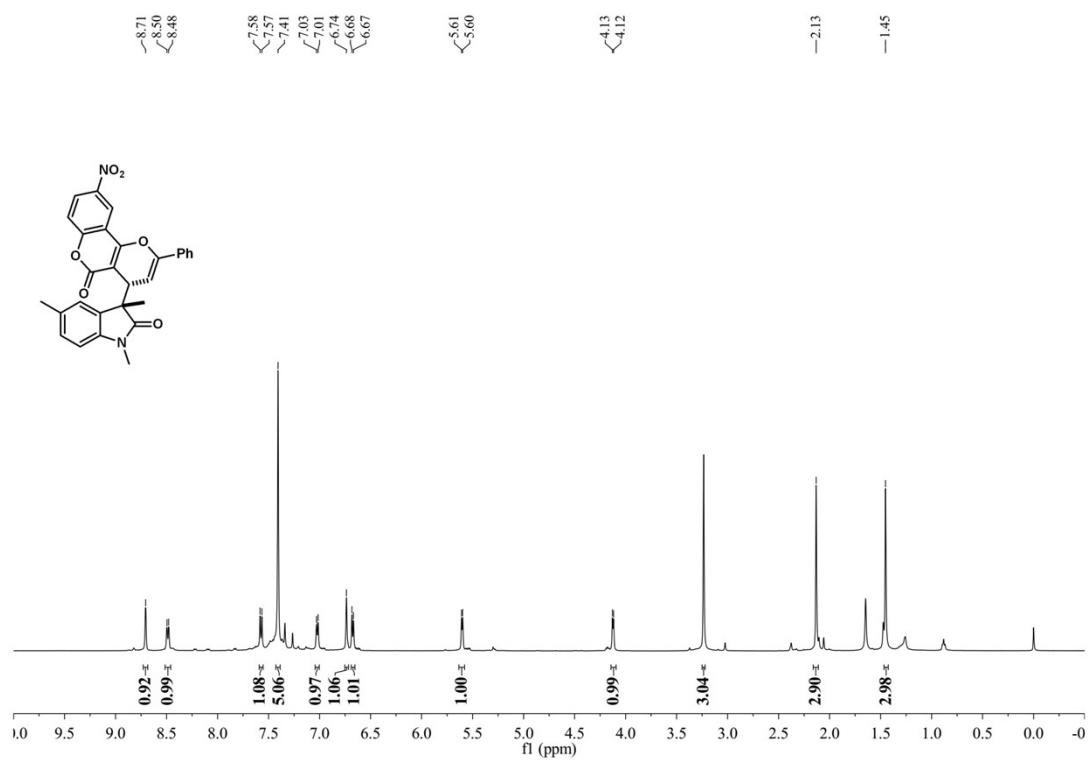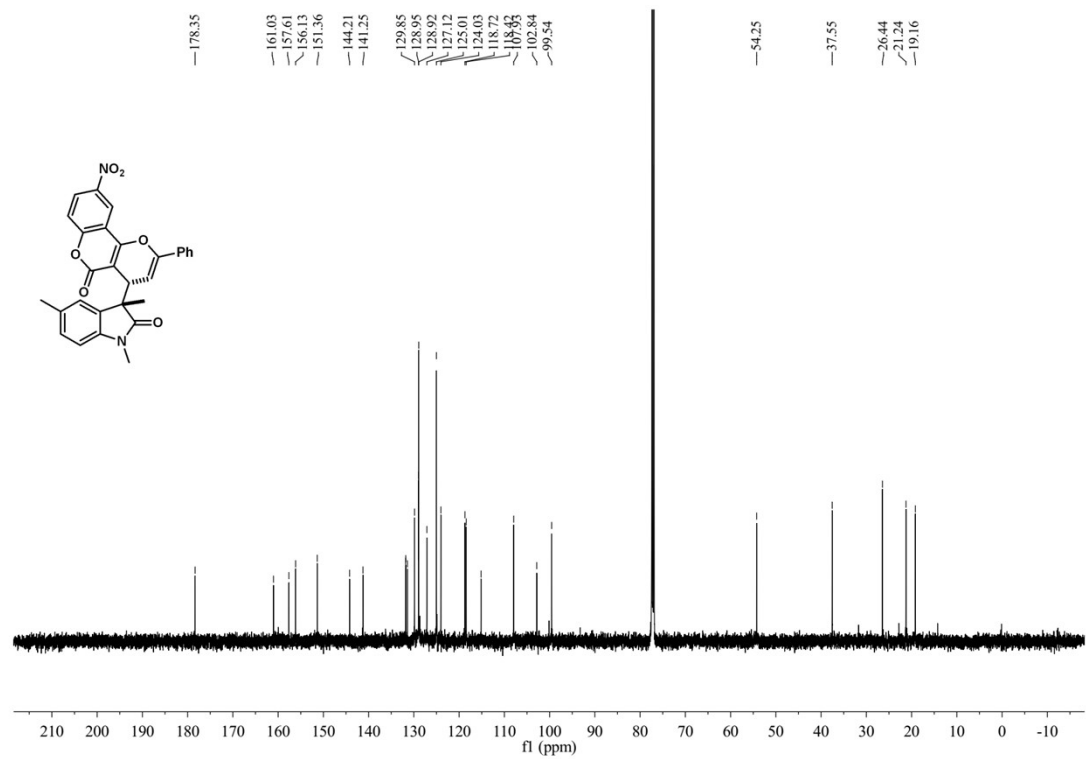

<sup>1</sup>H NMR (500 MHz, CDCl<sub>3</sub>) and <sup>13</sup>C NMR (125 MHz, CDCl<sub>3</sub>) spectra for 4be

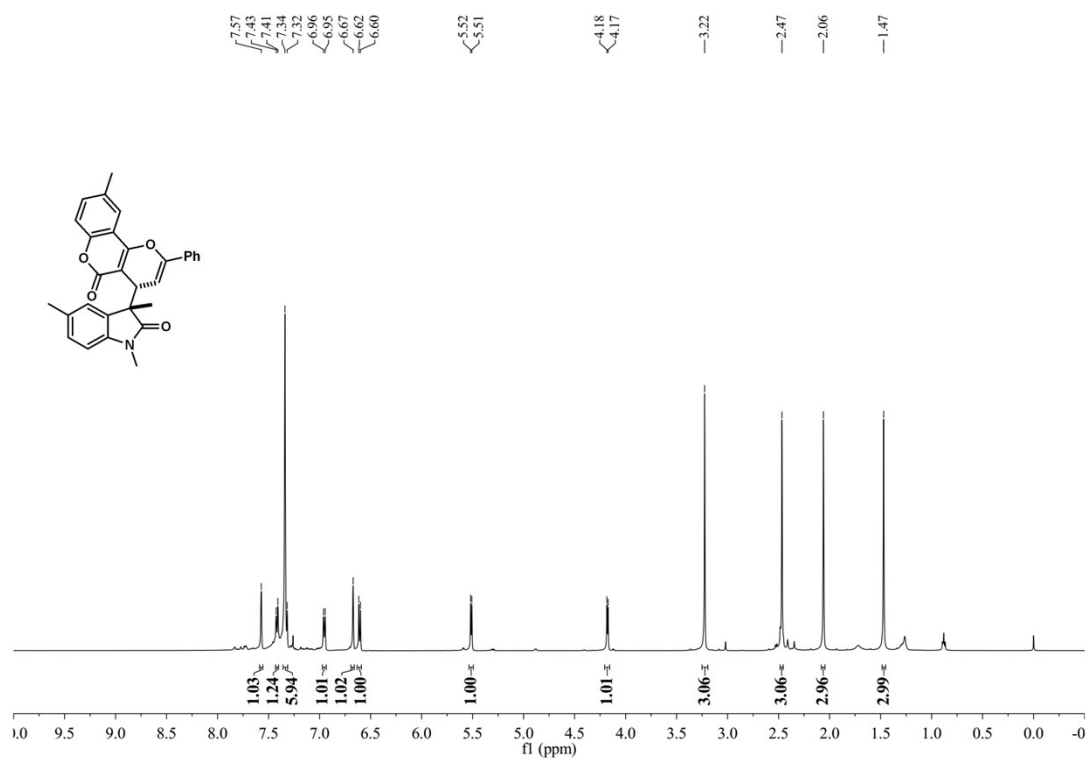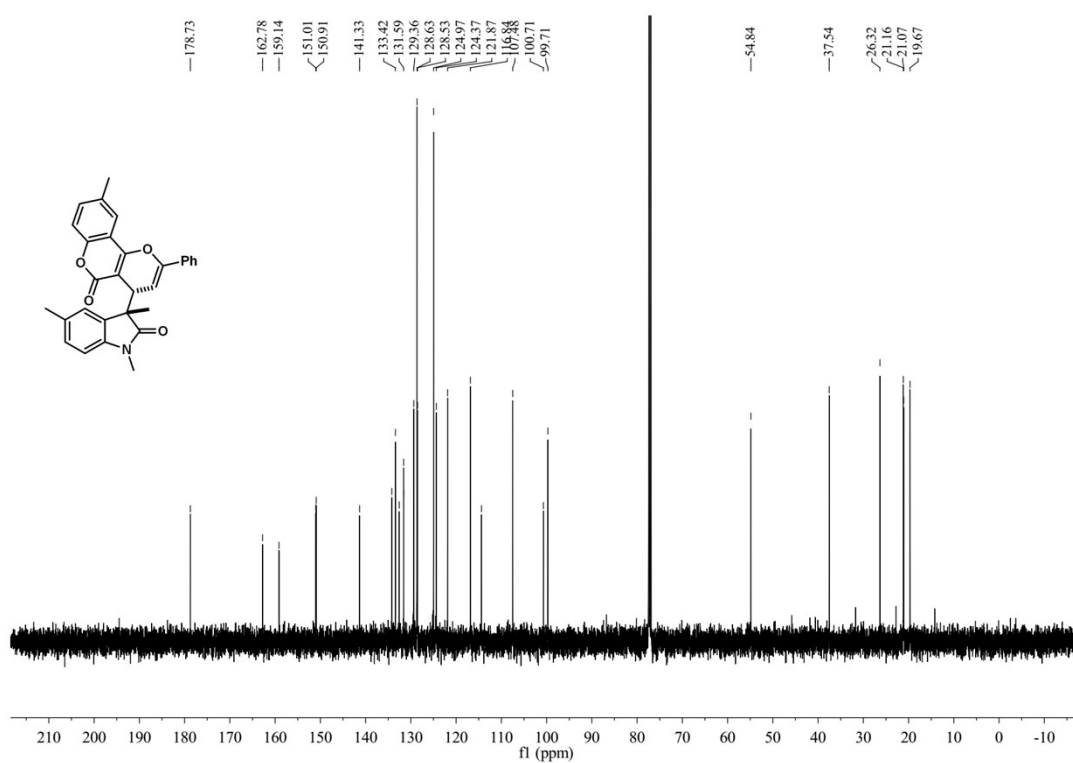

**<sup>1</sup>H NMR (500 MHz, CDCl<sub>3</sub>) and <sup>13</sup>C NMR (125 MHz, CDCl<sub>3</sub>) spectra for 4bf**

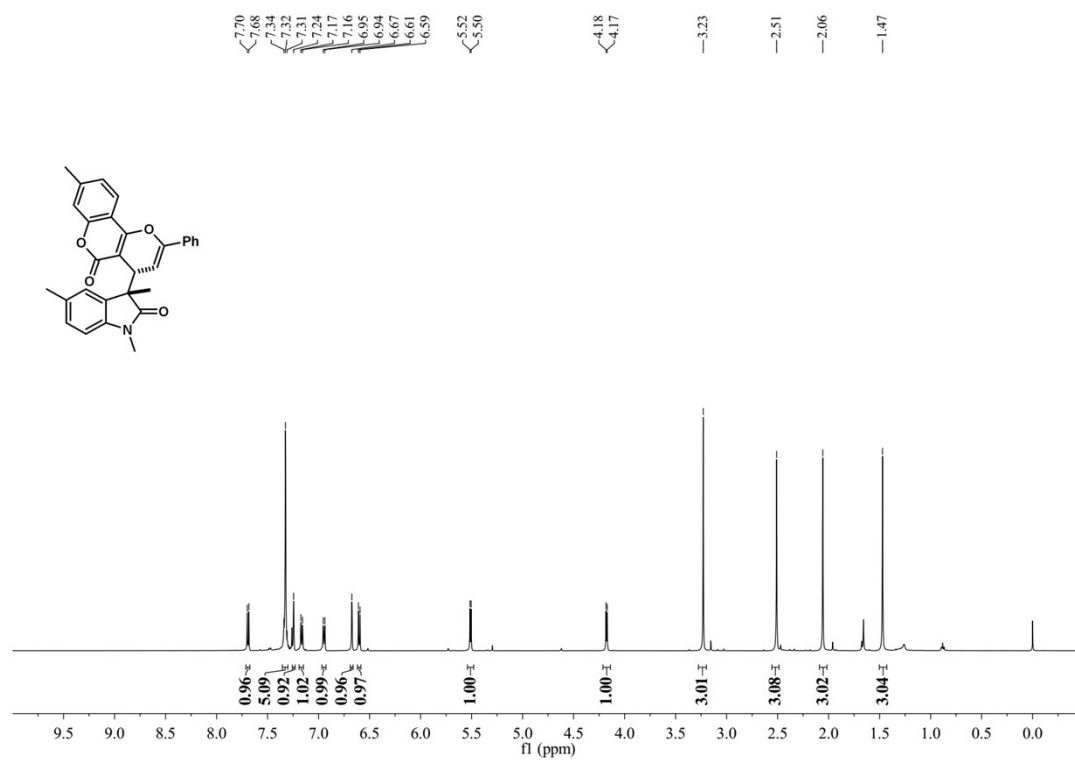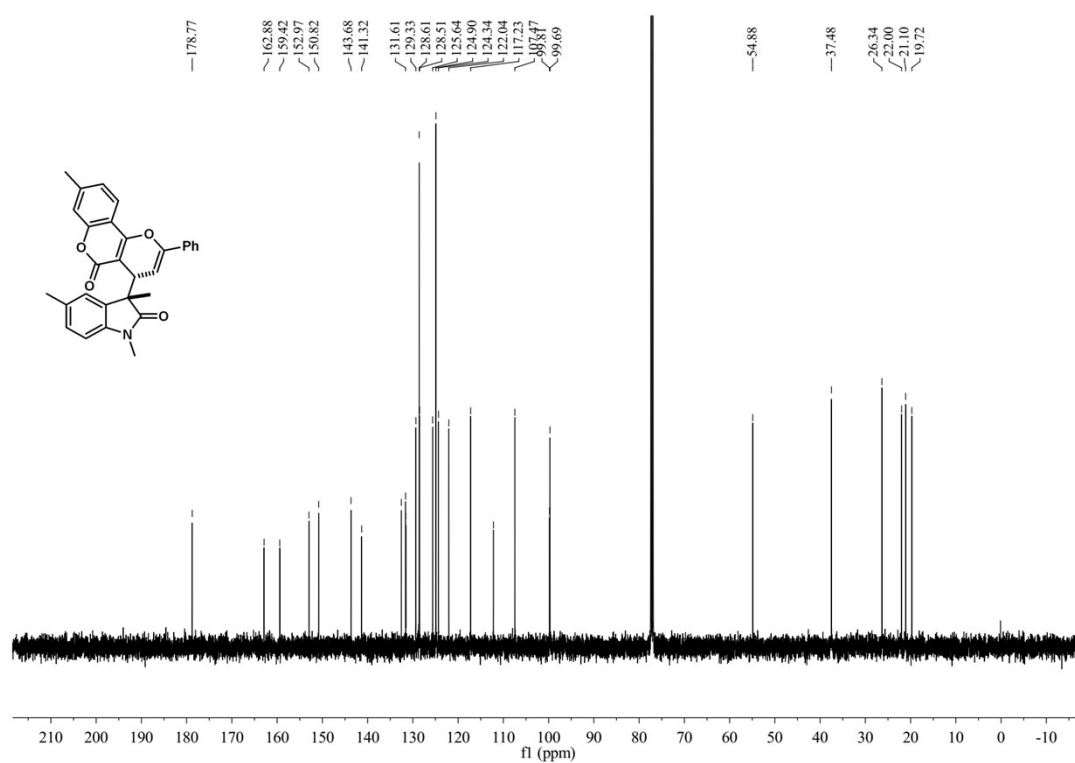



<sup>1</sup>H NMR (500 MHz, CDCl<sub>3</sub>) and <sup>13</sup>C NMR (125 MHz, CDCl<sub>3</sub>) spectra for 4bg

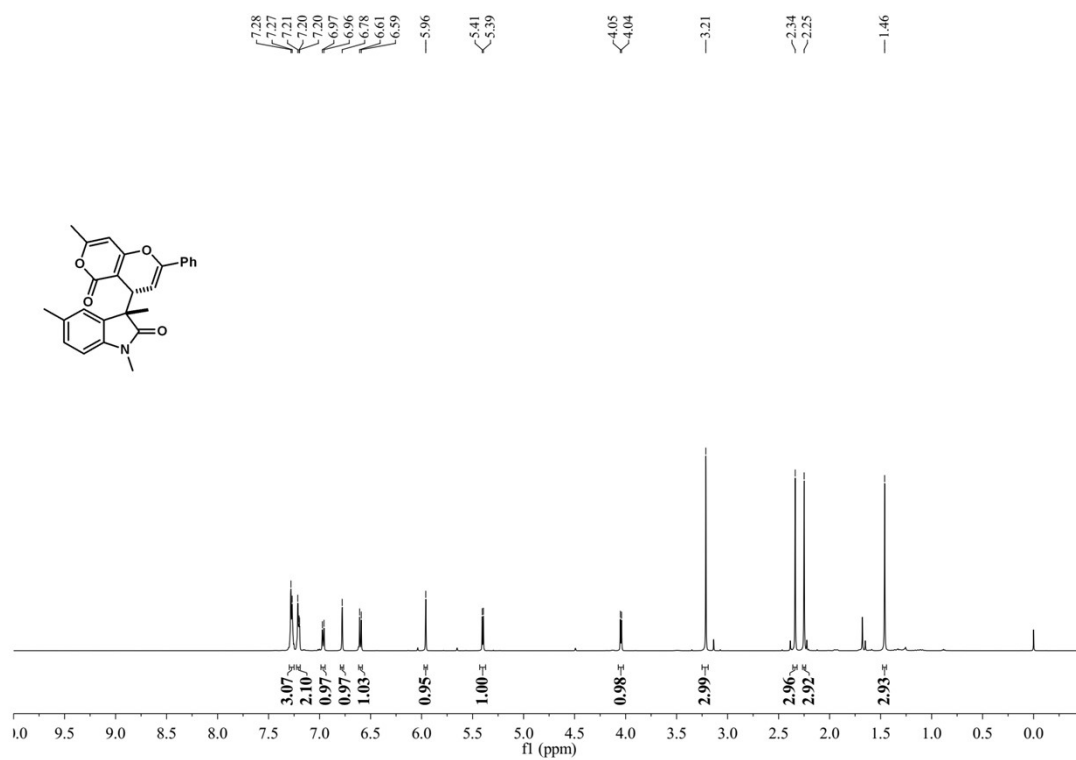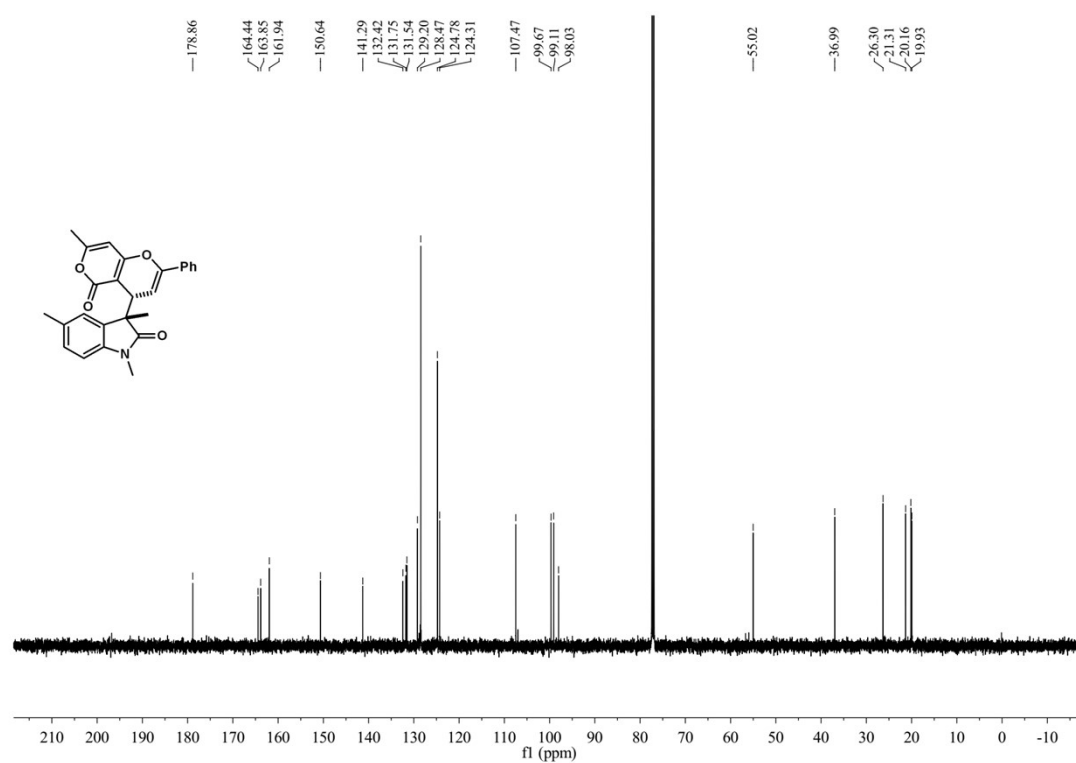

**<sup>1</sup>H NMR (500 MHz, CDCl<sub>3</sub>) and <sup>13</sup>C NMR (125 MHz, CDCl<sub>3</sub>) spectra for 4ca**

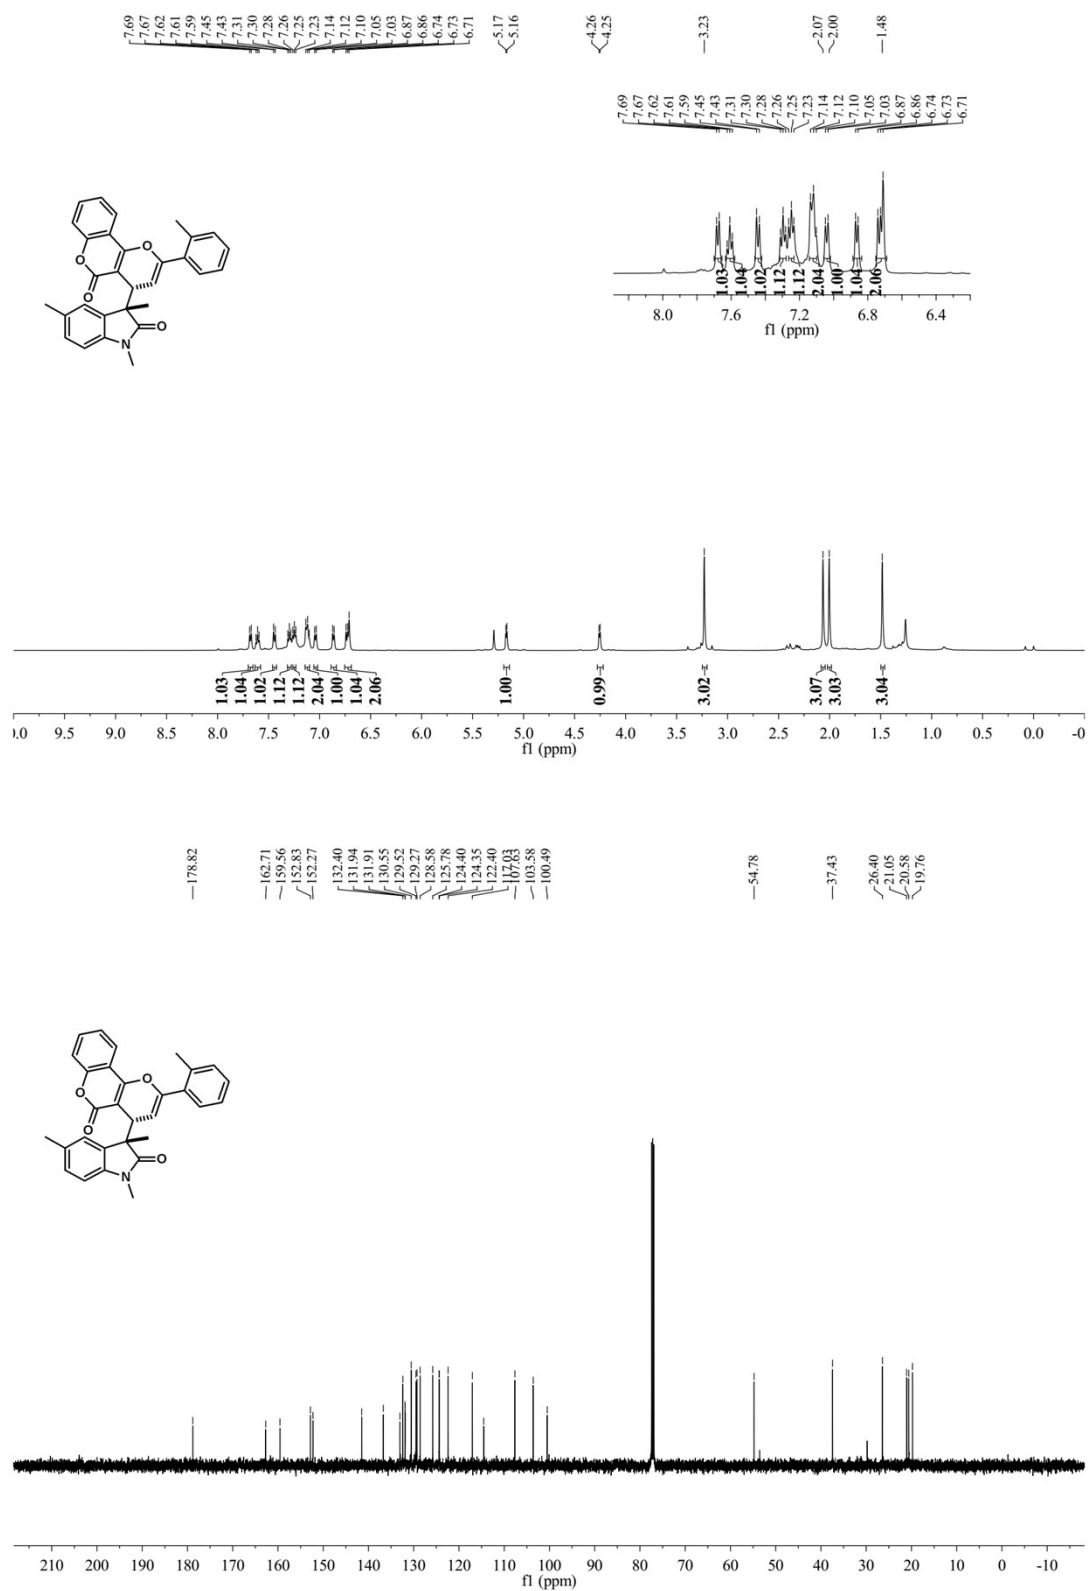

<sup>1</sup>H NMR (500 MHz, CDCl<sub>3</sub>) and <sup>13</sup>C NMR (125 MHz, CDCl<sub>3</sub>) spectra for 4cb

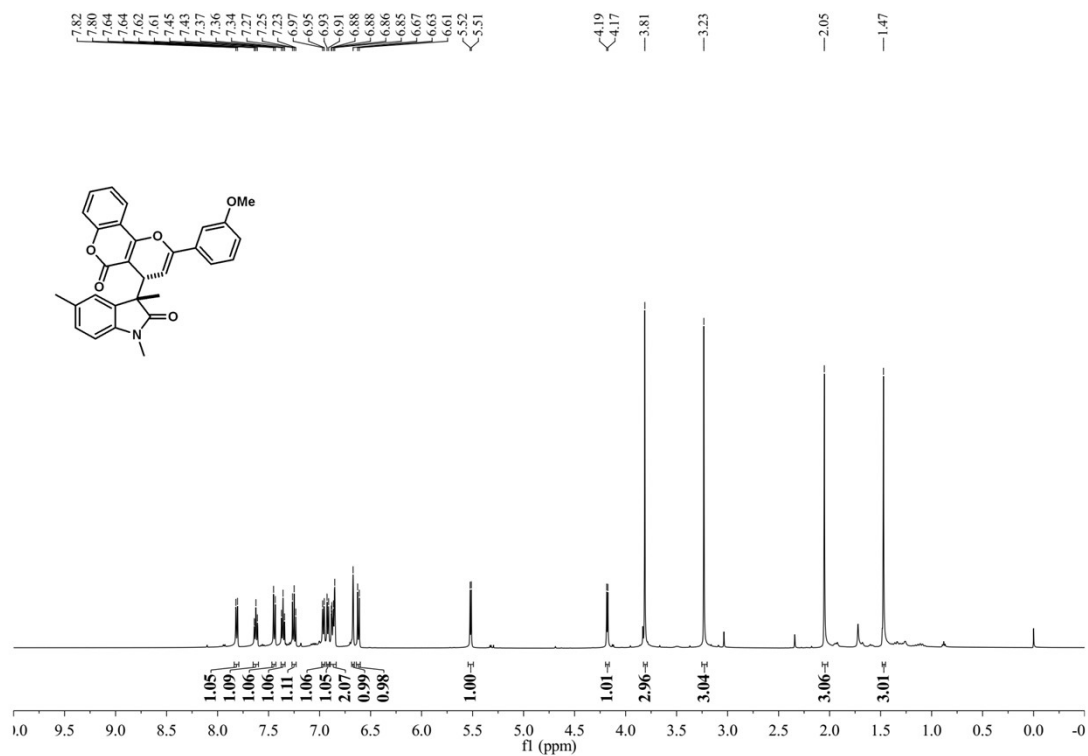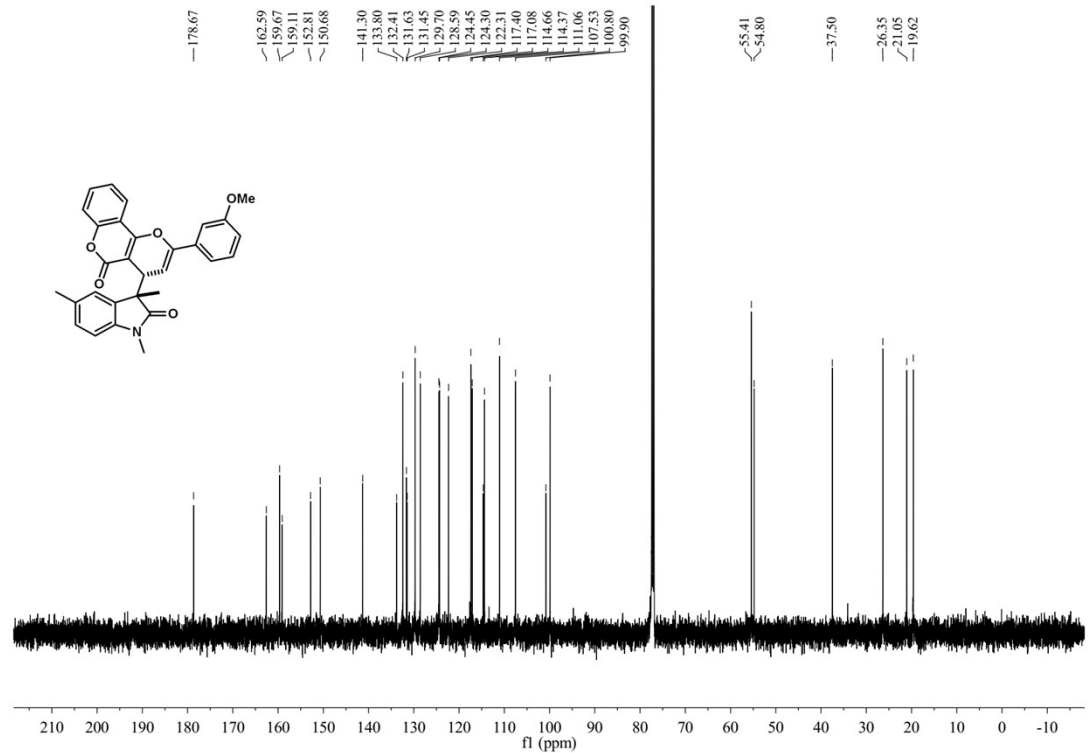

**<sup>1</sup>H NMR (500 MHz, CDCl<sub>3</sub>) and <sup>13</sup>C NMR (125 MHz, CDCl<sub>3</sub>) spectra for 4cc**

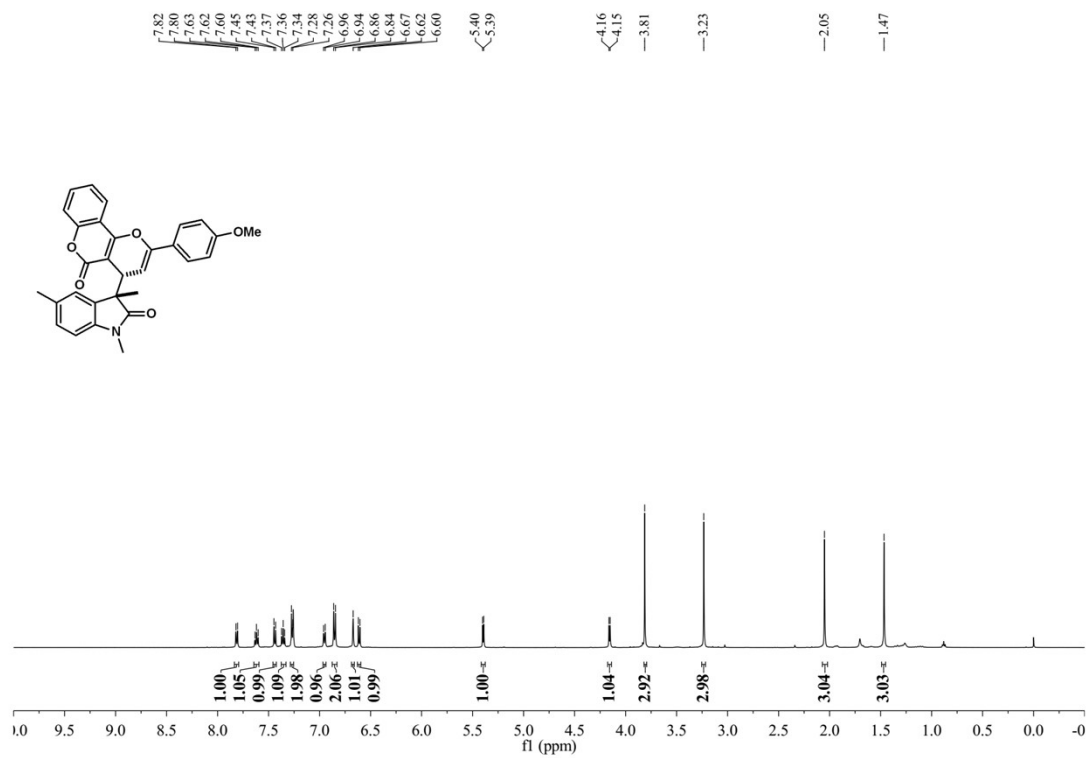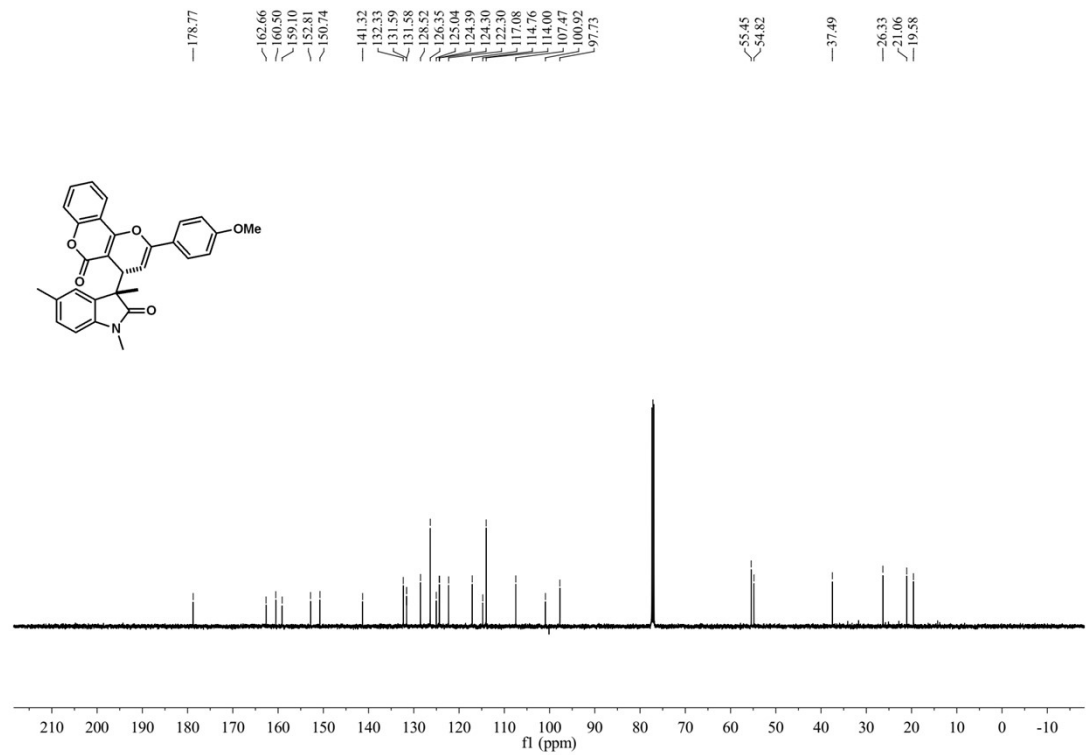

**<sup>1</sup>H NMR (500 MHz, CDCl<sub>3</sub>) and <sup>13</sup>C NMR (125 MHz, CDCl<sub>3</sub>) spectra for 4cd**

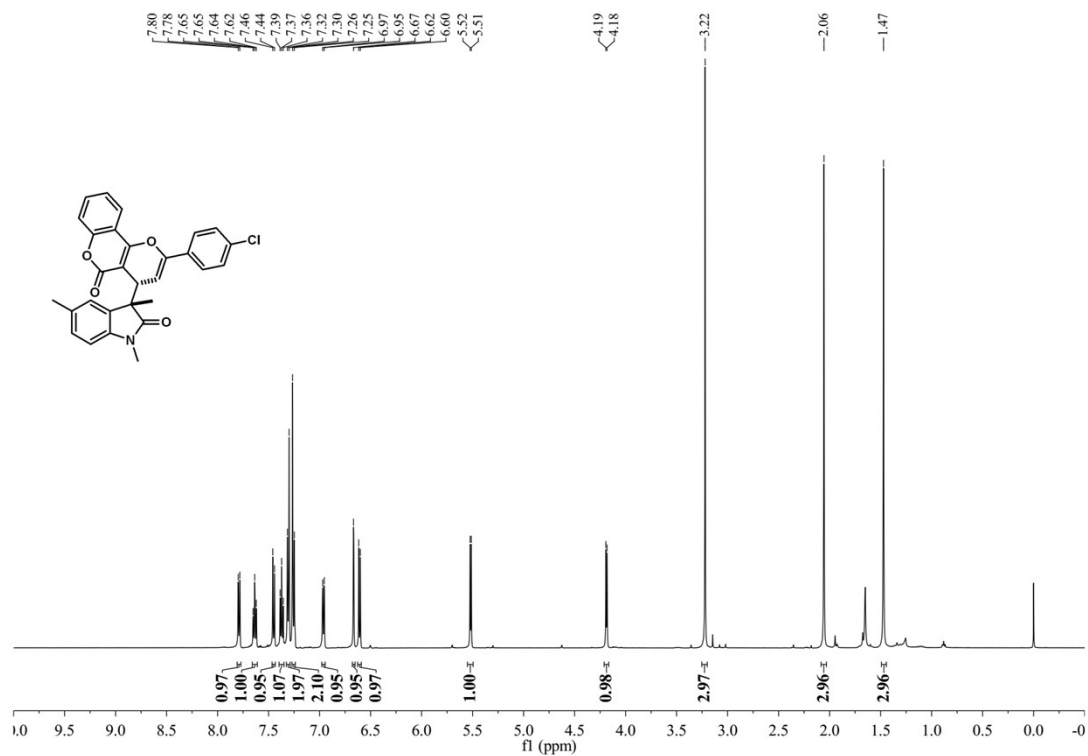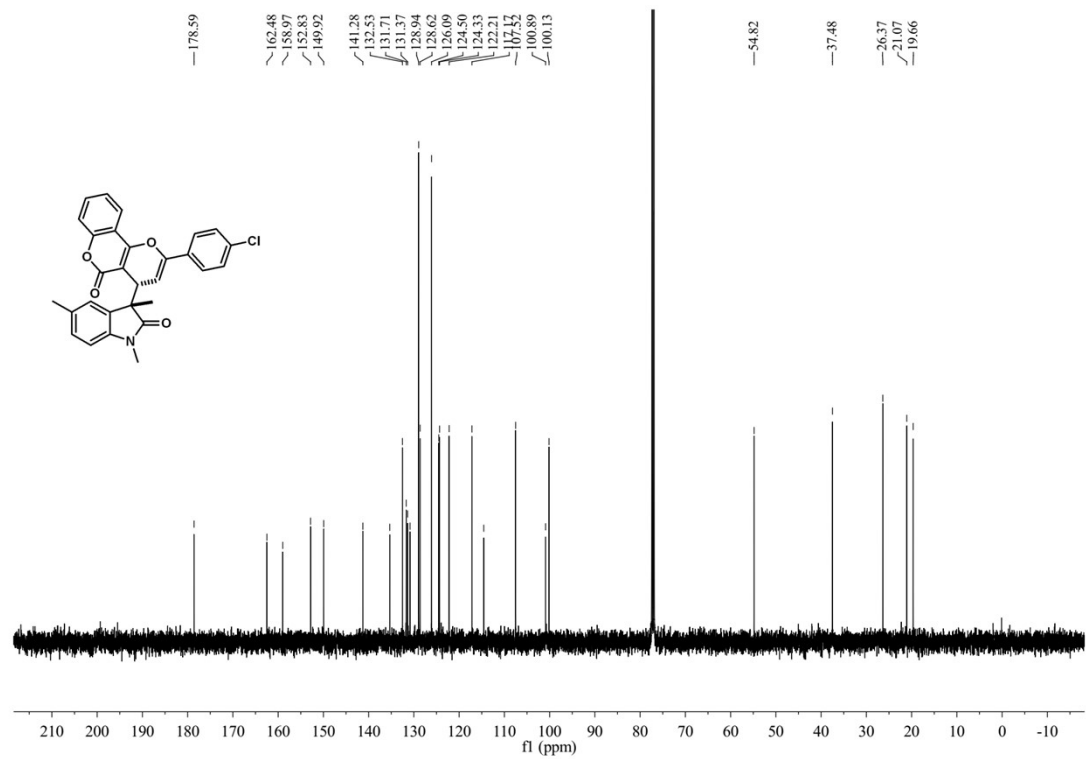

**<sup>1</sup>H NMR (500 MHz, CDCl<sub>3</sub>) and <sup>13</sup>C NMR (125 MHz, CDCl<sub>3</sub>) spectra for 4ce**

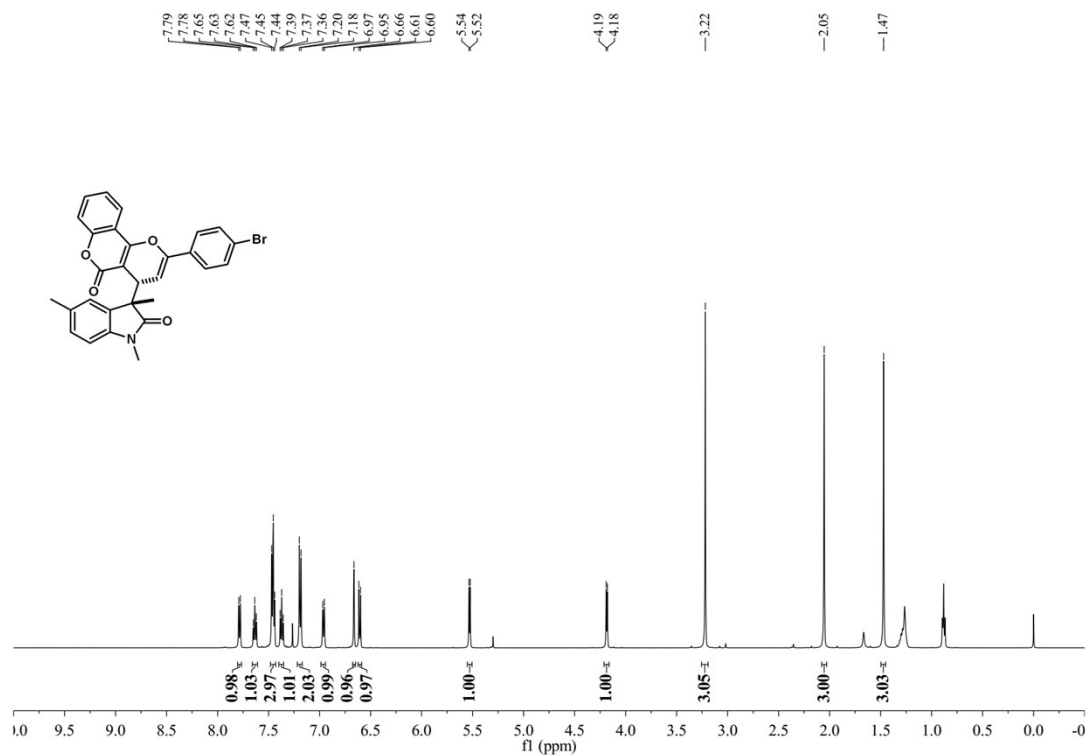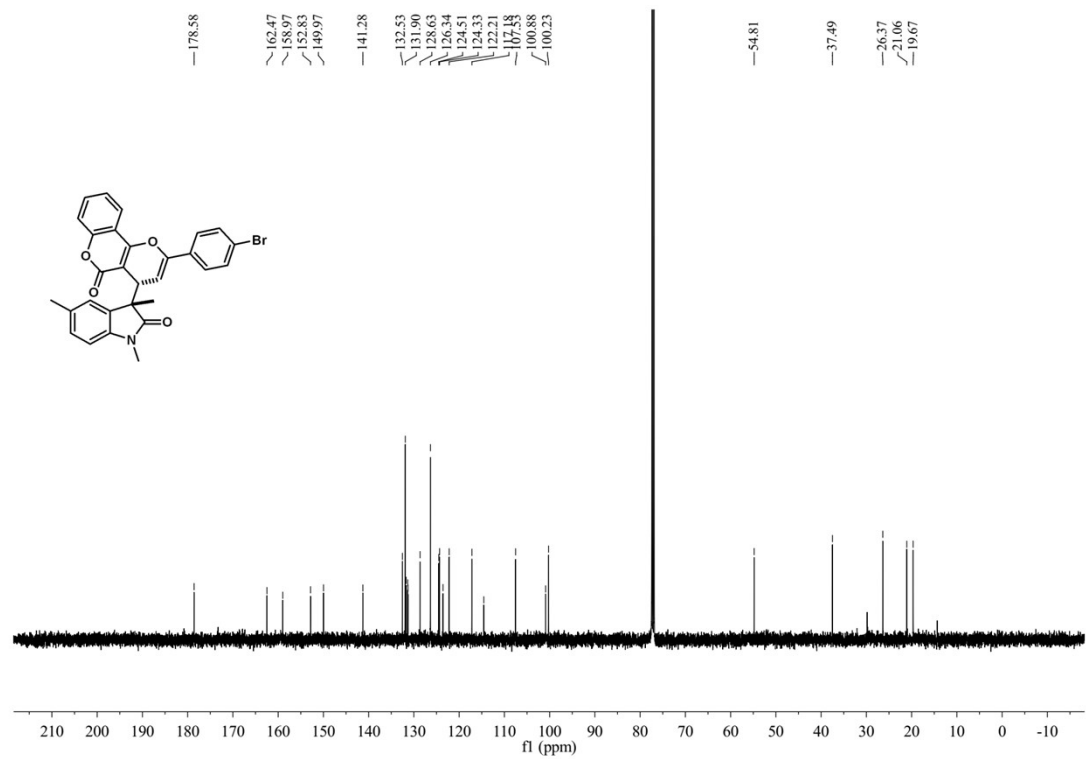

**<sup>1</sup>H NMR (500 MHz, CDCl<sub>3</sub>) and <sup>13</sup>C NMR (125 MHz, CDCl<sub>3</sub>) spectra for 4cf**

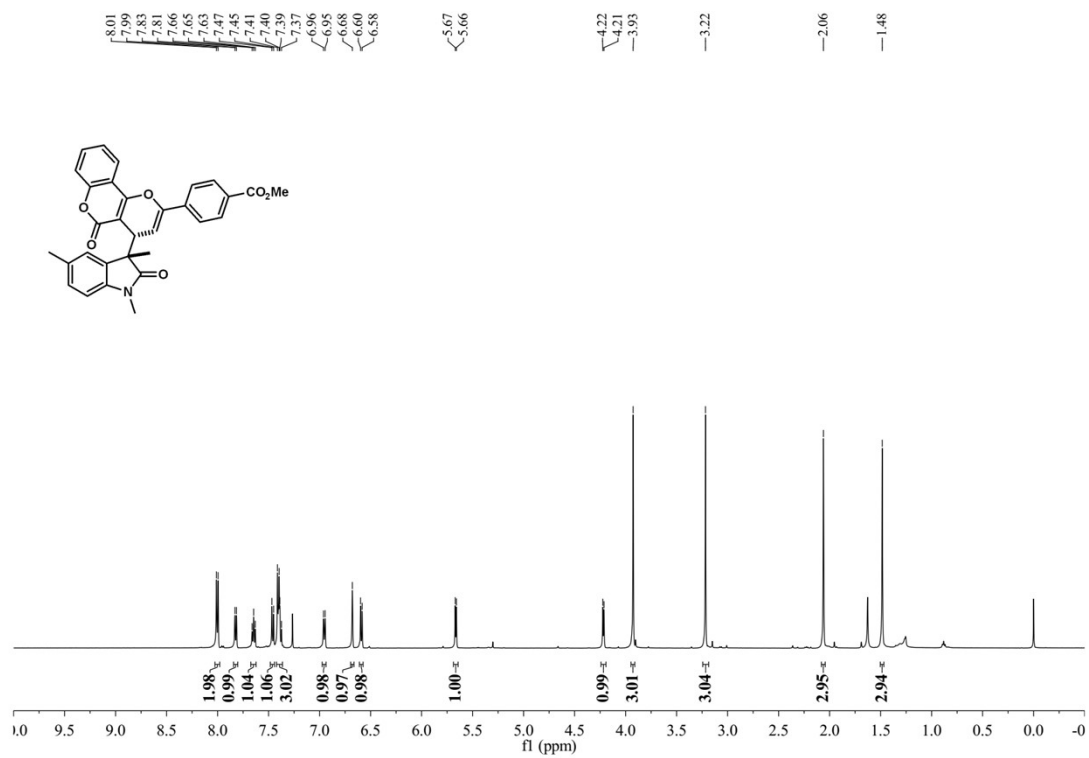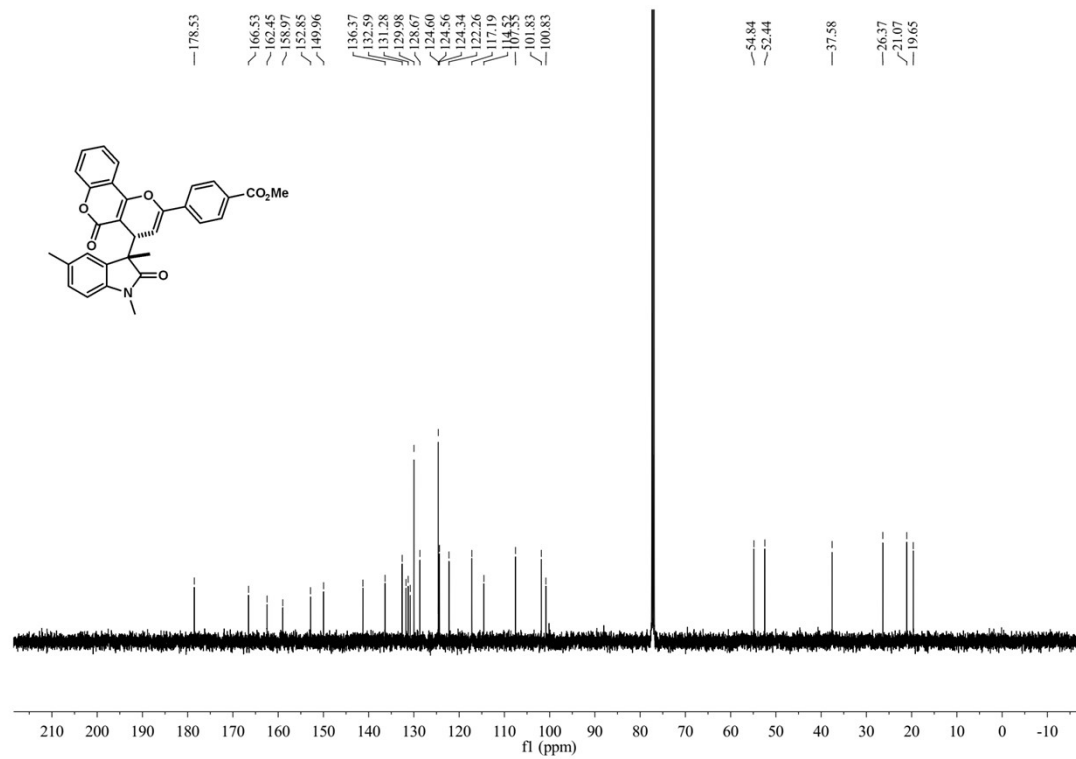

**<sup>1</sup>H NMR (500 MHz, CDCl<sub>3</sub>) and <sup>13</sup>C NMR (125 MHz, CDCl<sub>3</sub>) spectra for 4c**

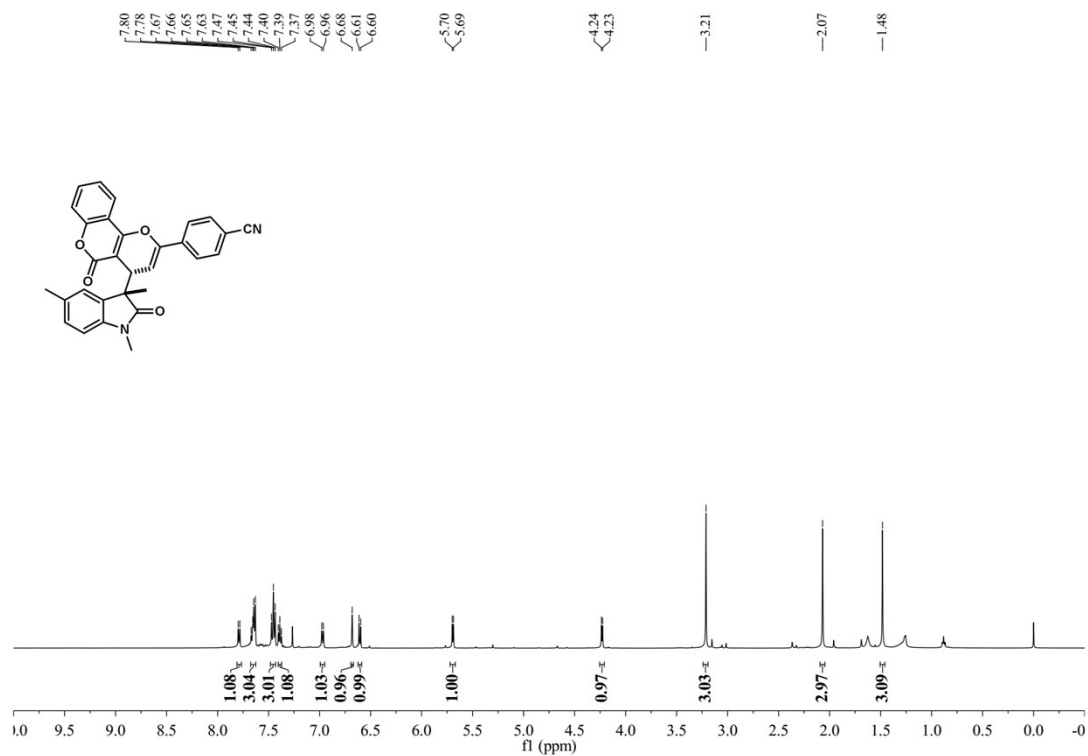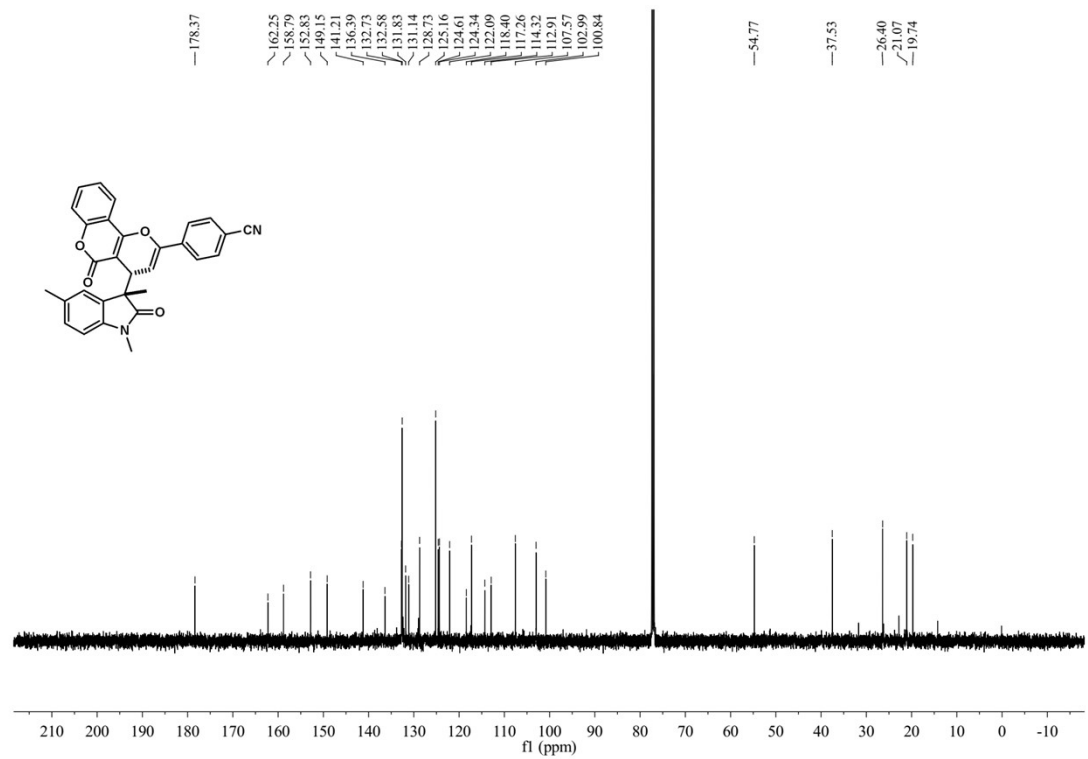



**<sup>1</sup>H NMR (500 MHz, CDCl<sub>3</sub>) and <sup>13</sup>C NMR (125 MHz, CDCl<sub>3</sub>) spectra for 4ch**

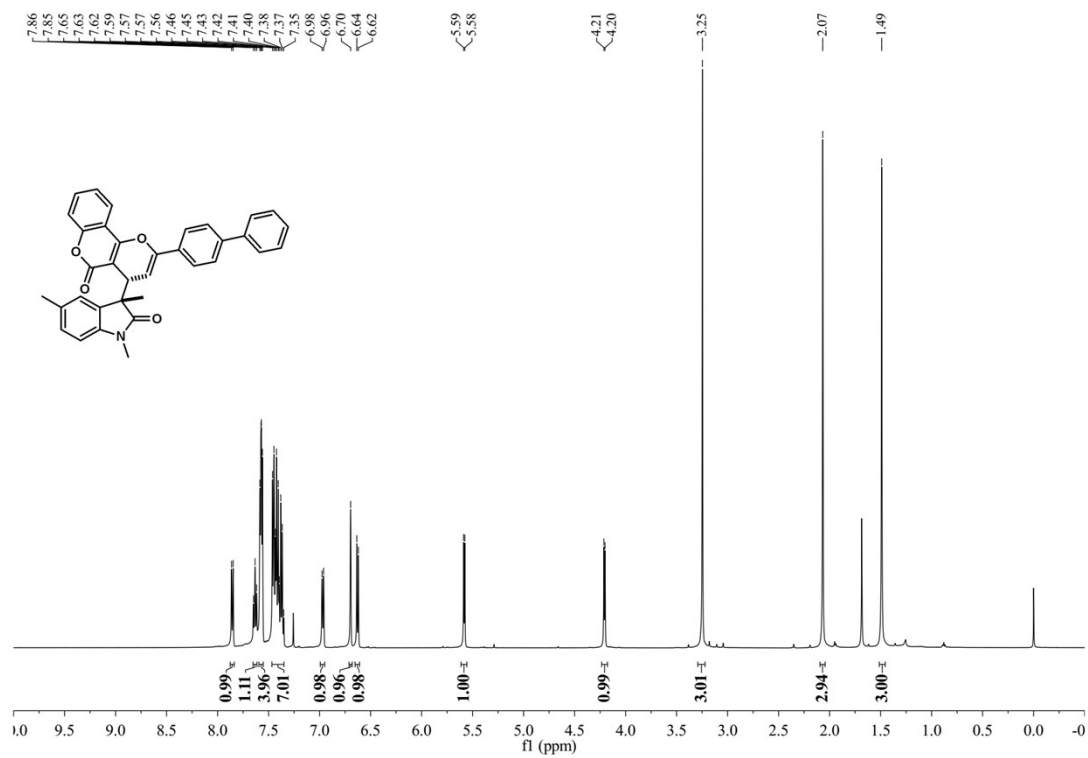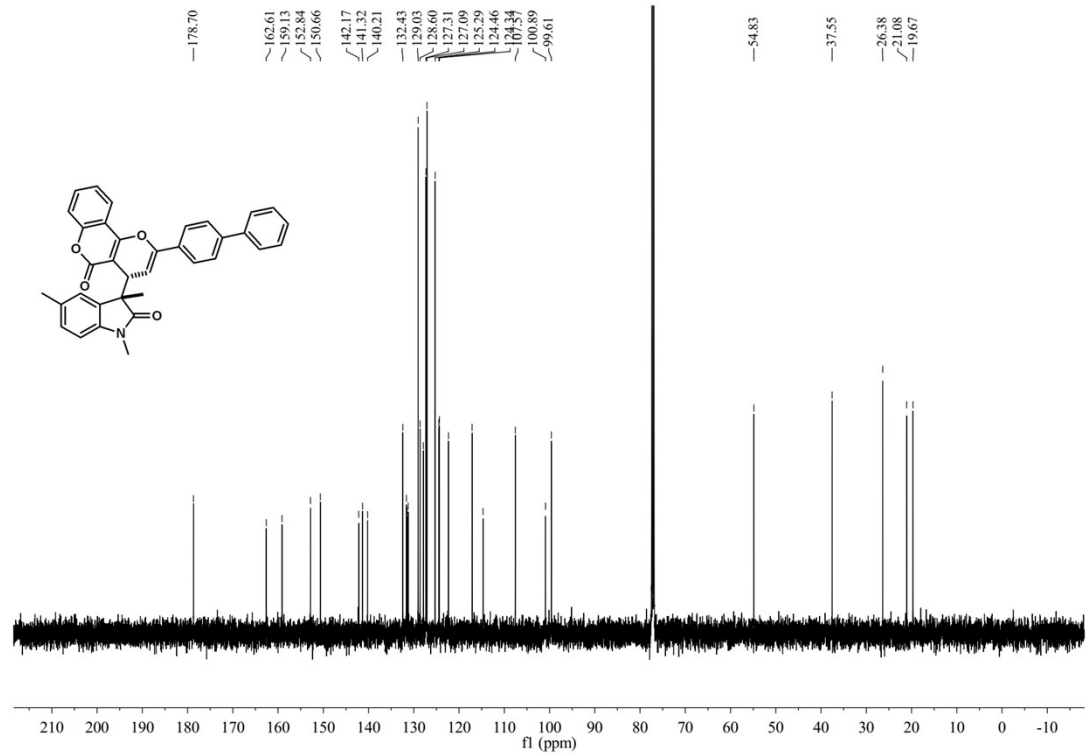

**<sup>1</sup>H NMR (500 MHz, CDCl<sub>3</sub>) and <sup>13</sup>C NMR (125 MHz, CDCl<sub>3</sub>) spectra for 4ci**

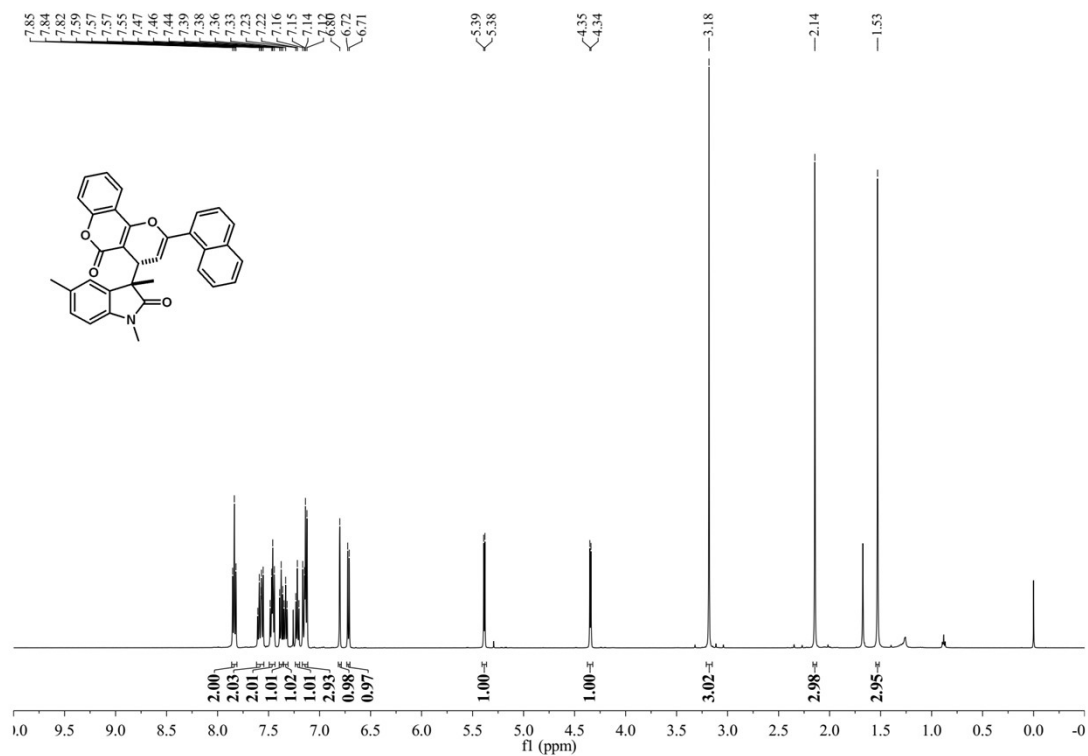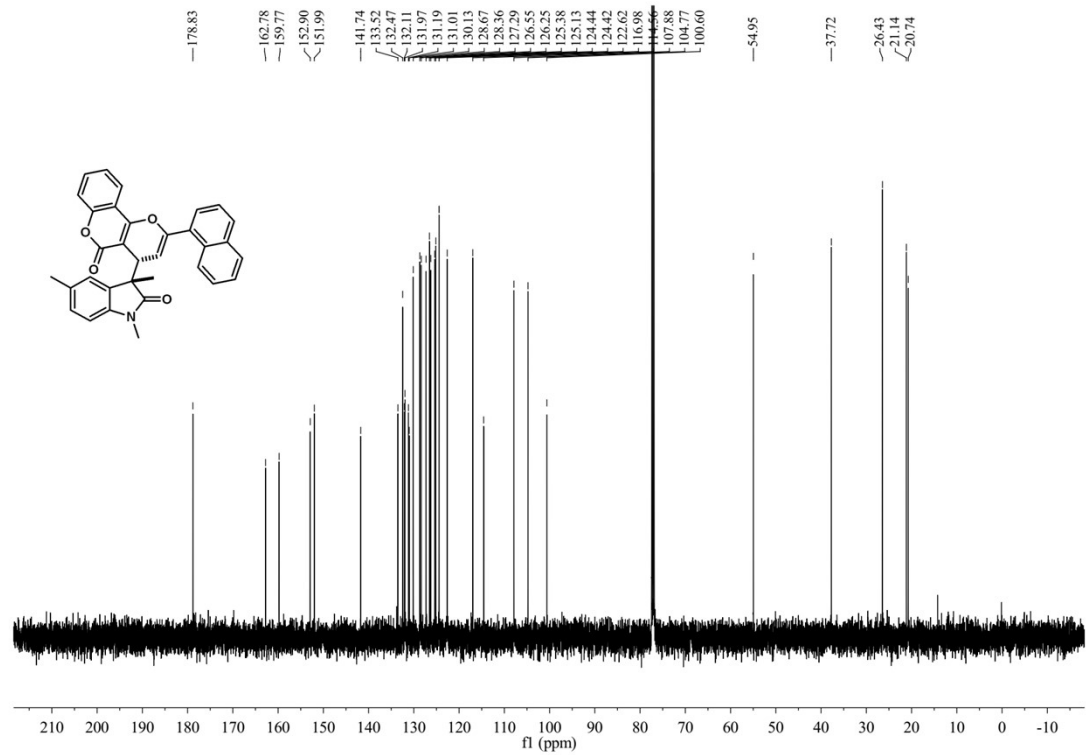

**<sup>1</sup>H NMR (500 MHz, CDCl<sub>3</sub>) and <sup>13</sup>C NMR (125 MHz, CDCl<sub>3</sub>) spectra for 4cj**

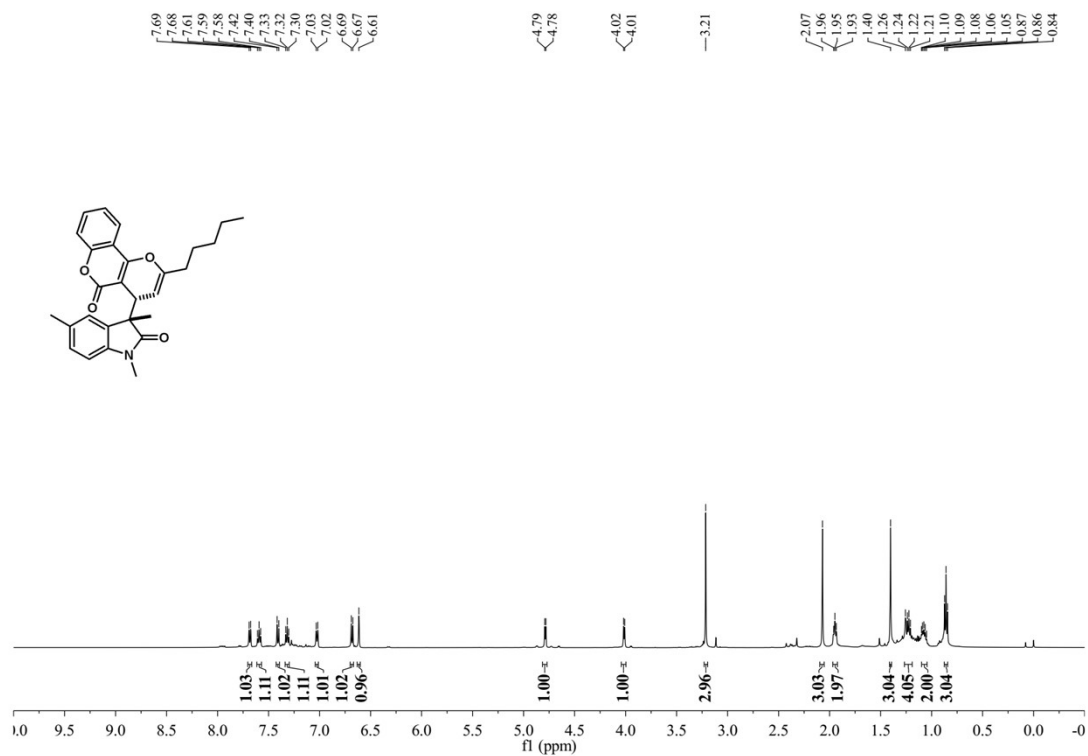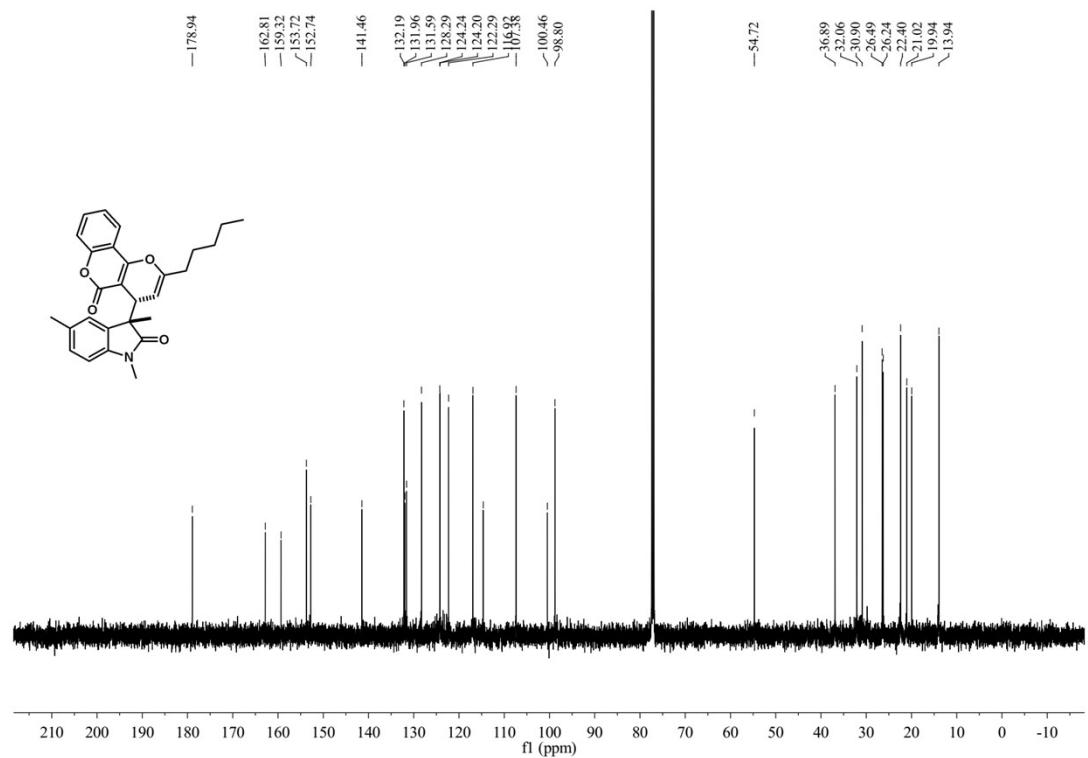

<sup>1</sup>H NMR (500 MHz, CDCl<sub>3</sub>) and <sup>13</sup>C NMR (125 MHz, CDCl<sub>3</sub>) spectra for 7a

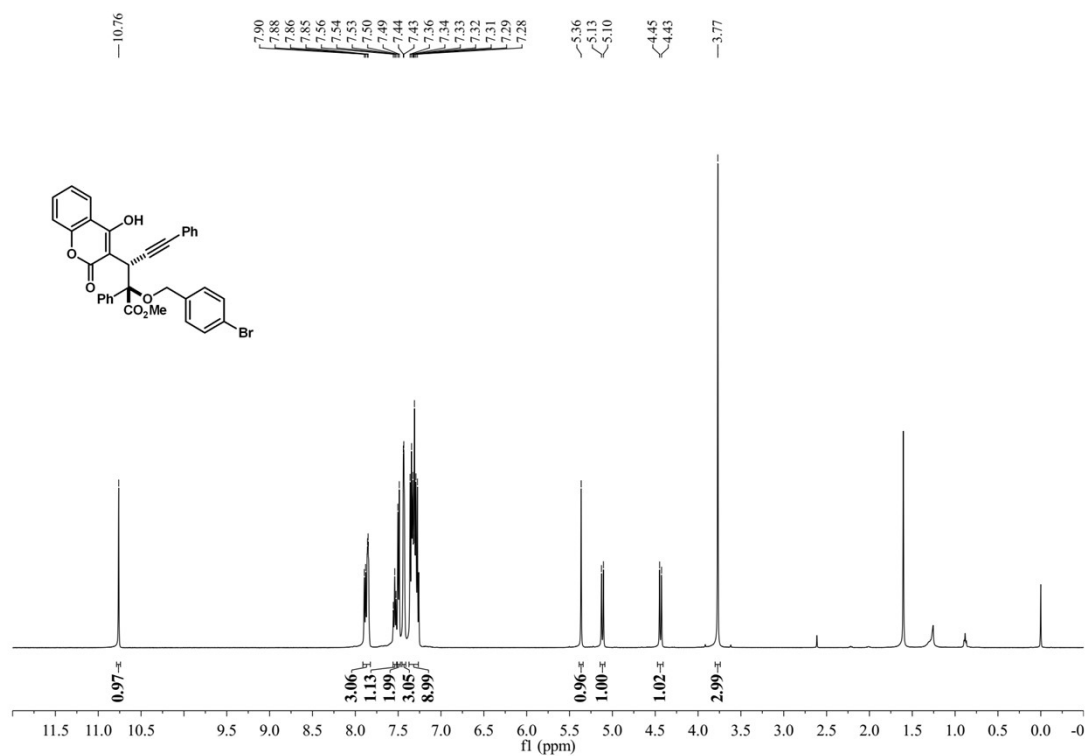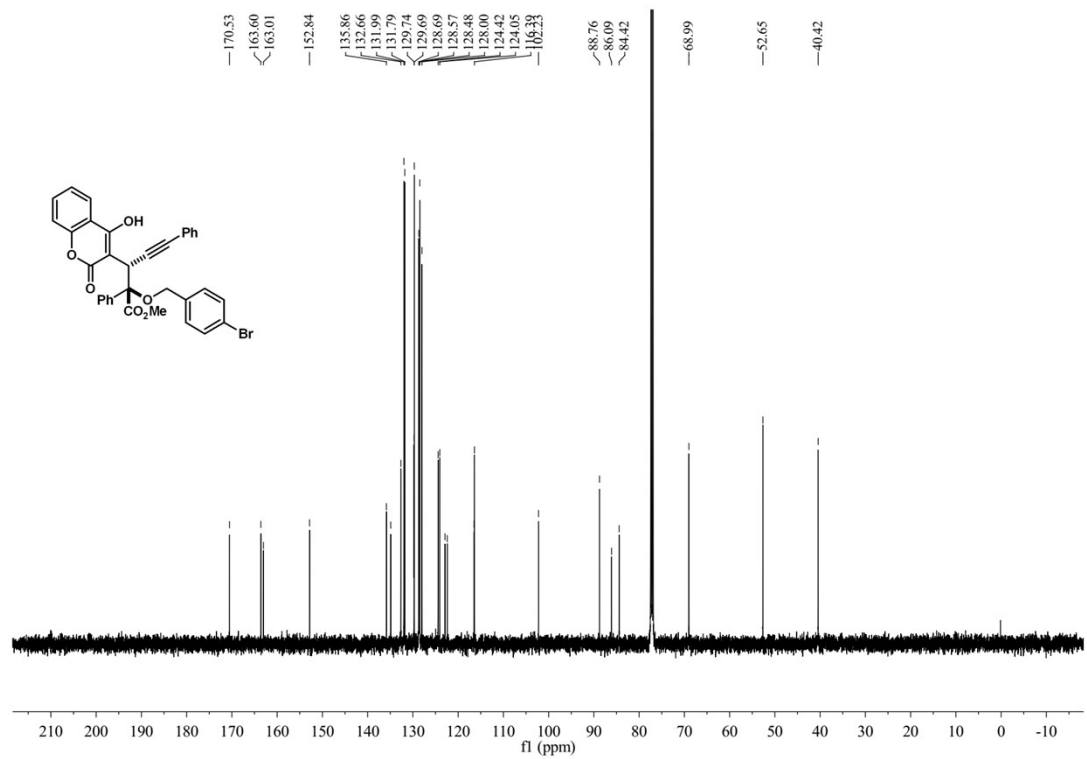

**$^1\text{H}$  NMR (400 MHz,  $\text{CDCl}_3$ ) and  $^{13}\text{C}$  NMR (100 MHz,  $\text{CDCl}_3$ ) spectra for 7b**

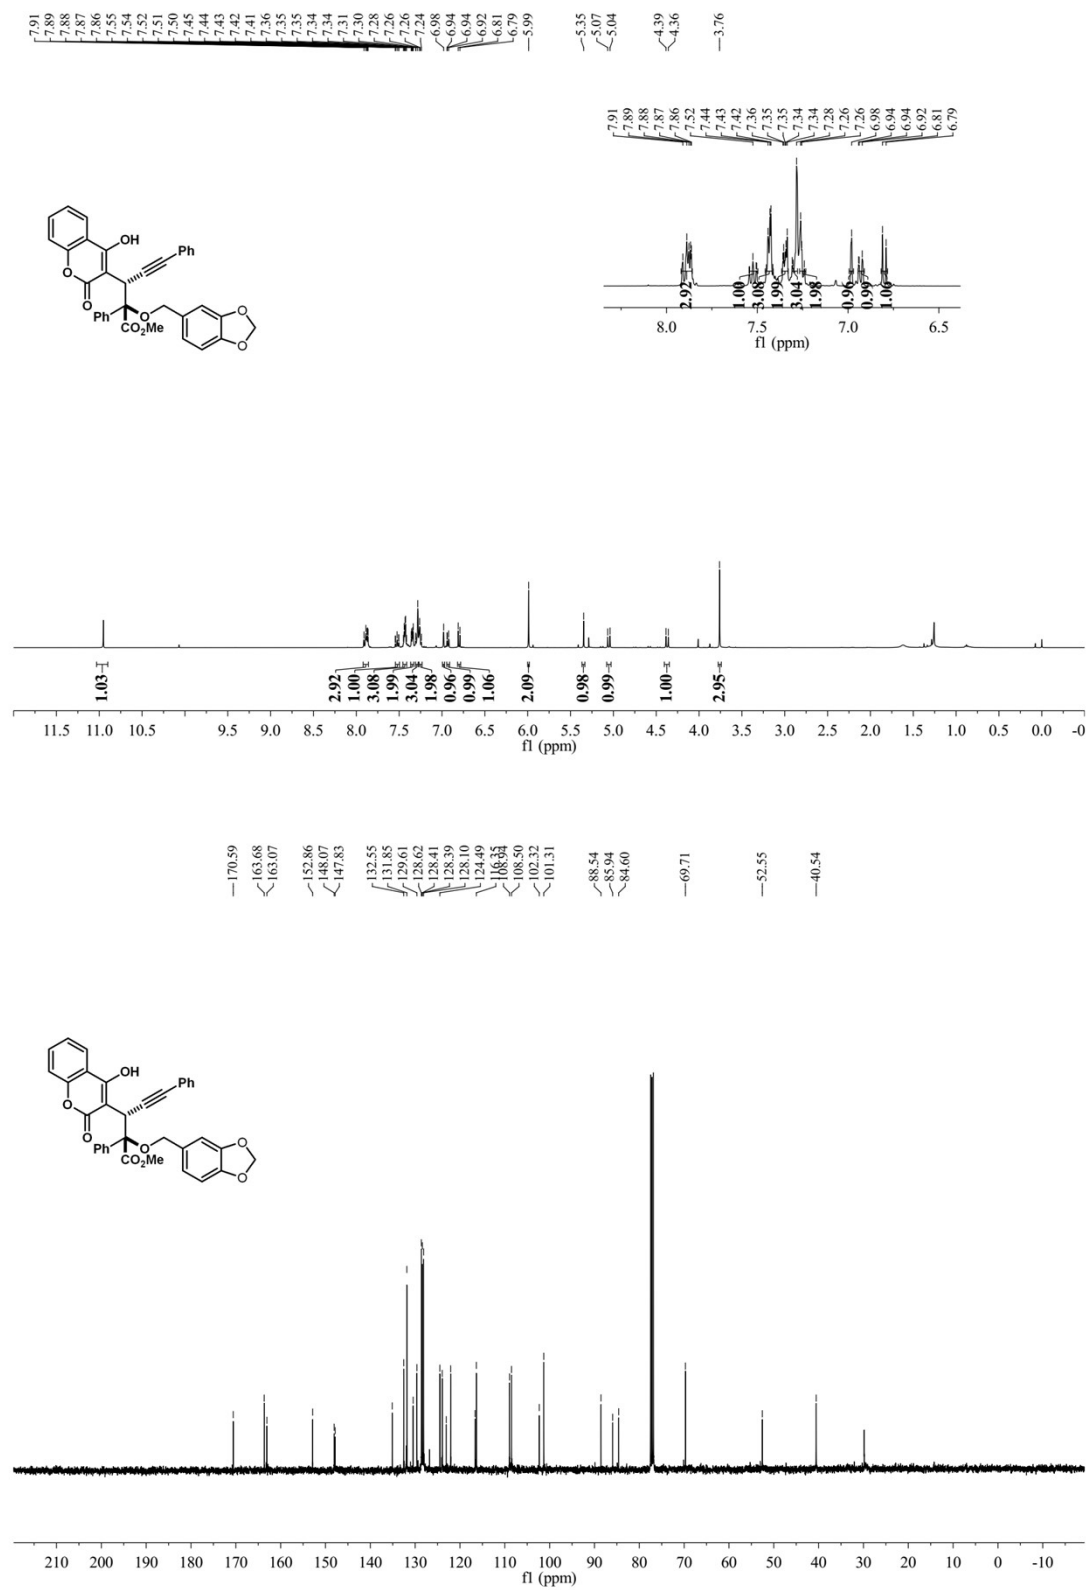

**$^1\text{H}$  NMR (400 MHz,  $\text{CDCl}_3$ ) and  $^{13}\text{C}$  NMR (100 MHz,  $\text{CDCl}_3$ ) spectra for 7c**

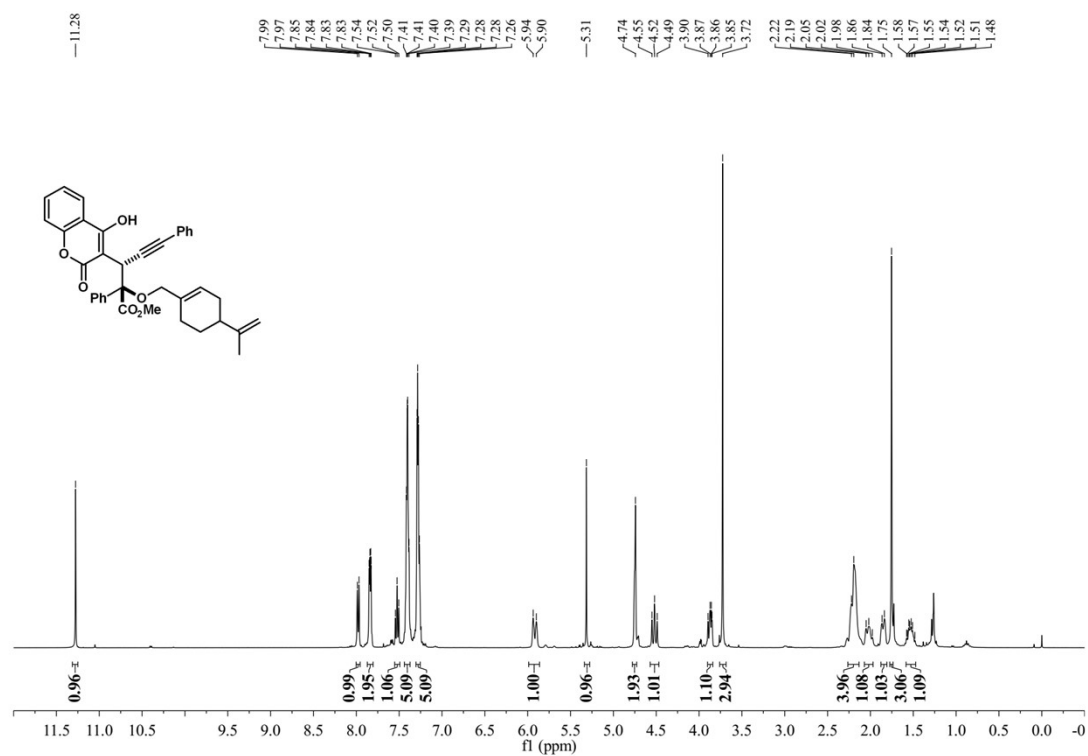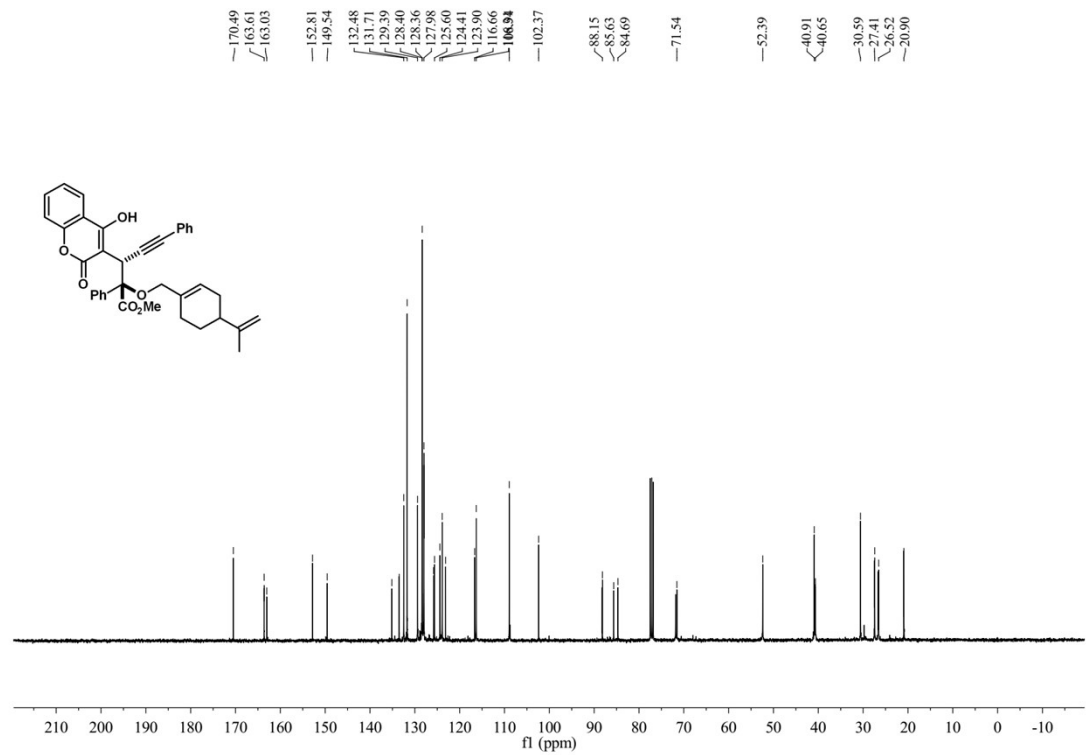



**<sup>1</sup>H NMR (400 MHz, CDCl<sub>3</sub>) and <sup>13</sup>C NMR (100 MHz, CDCl<sub>3</sub>) spectra for 7e**

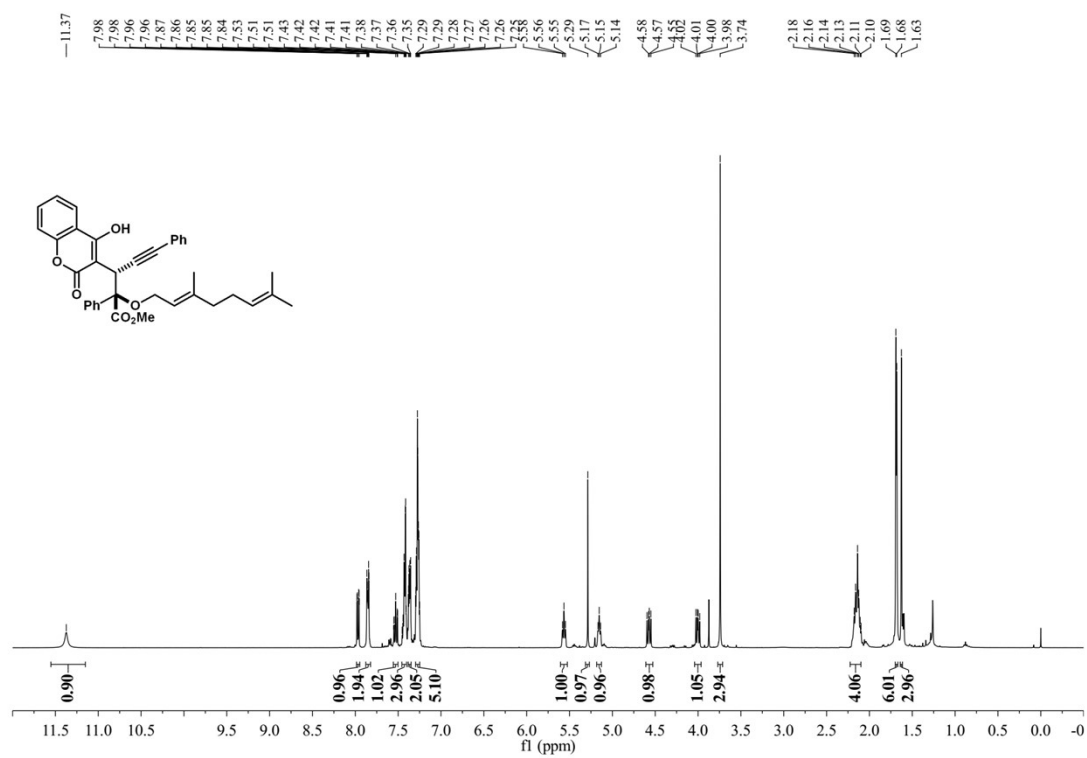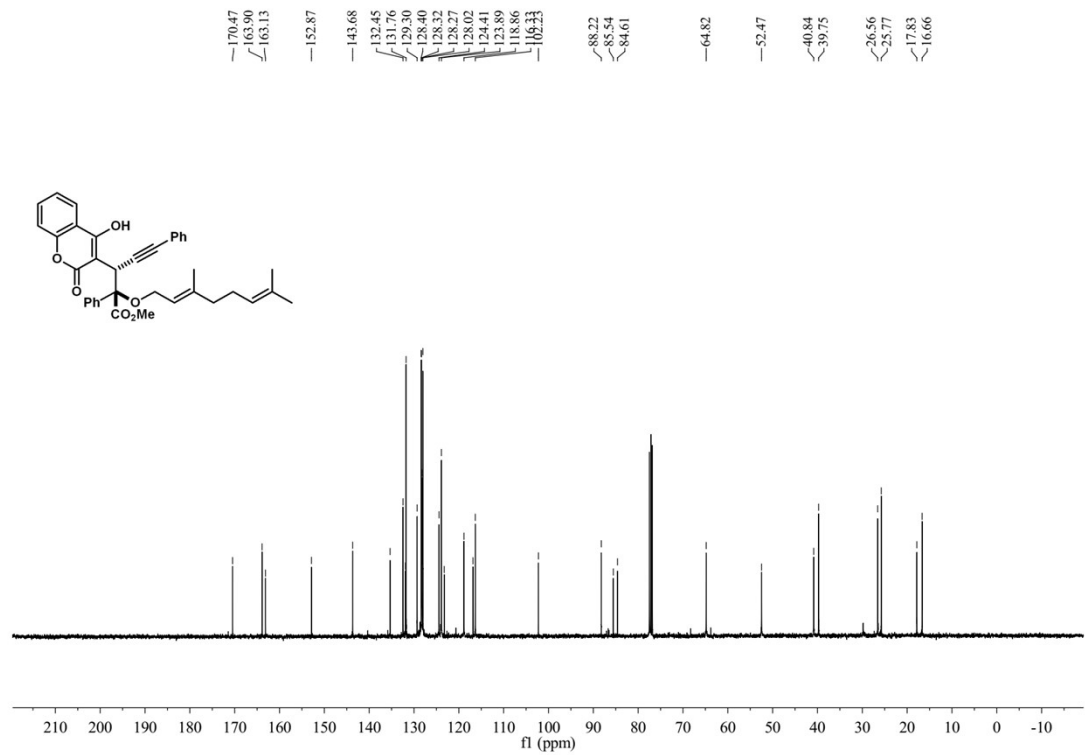





**<sup>1</sup>H NMR (400 MHz, CDCl<sub>3</sub>) and <sup>13</sup>C NMR (100 MHz, CDCl<sub>3</sub>) spectra for 7g**

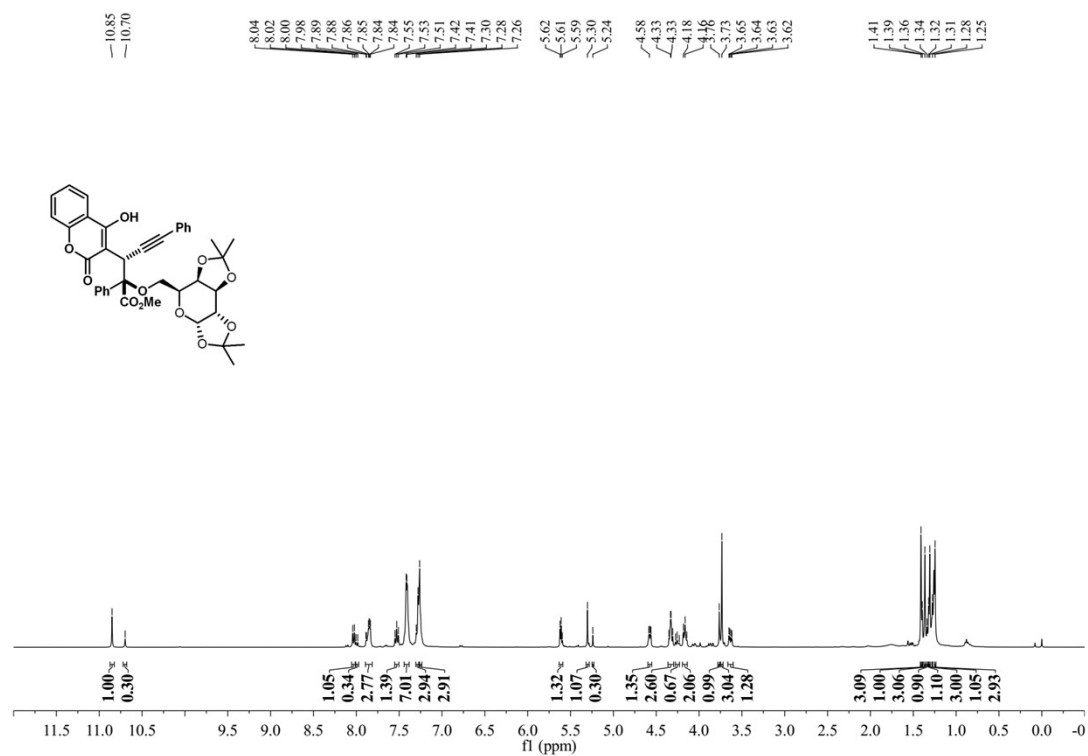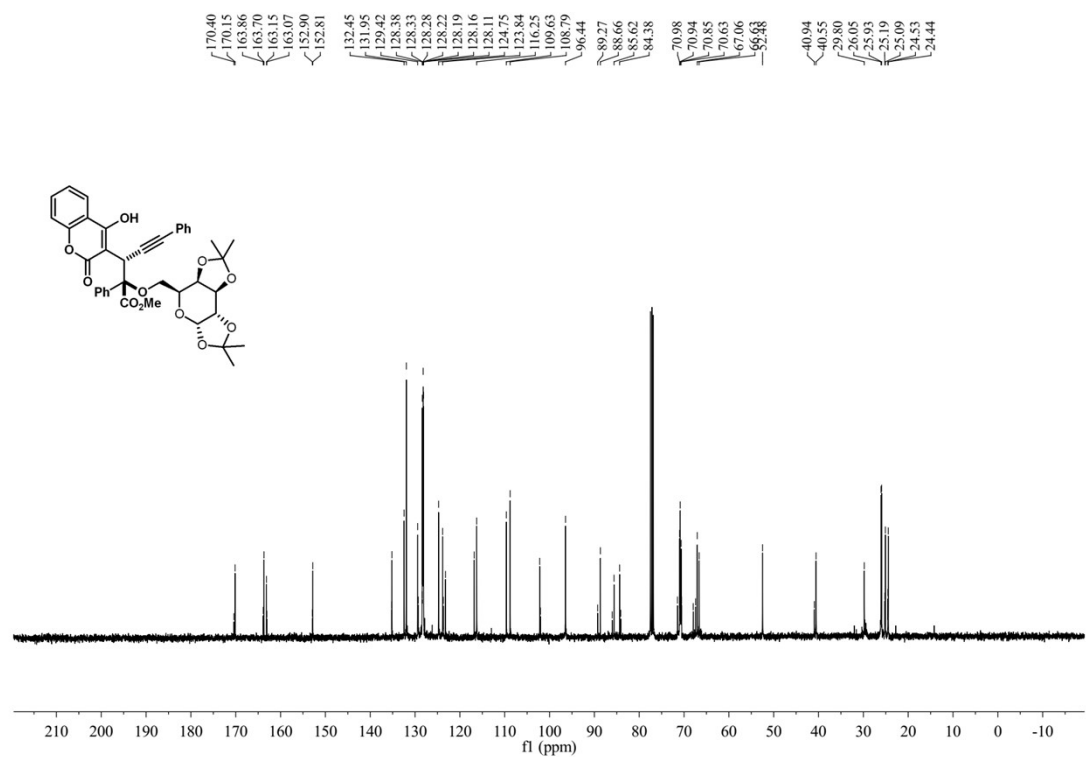

**<sup>1</sup>H NMR (500 MHz, CDCl<sub>3</sub>) and <sup>13</sup>C NMR (125 MHz, CDCl<sub>3</sub>) spectra for 8**

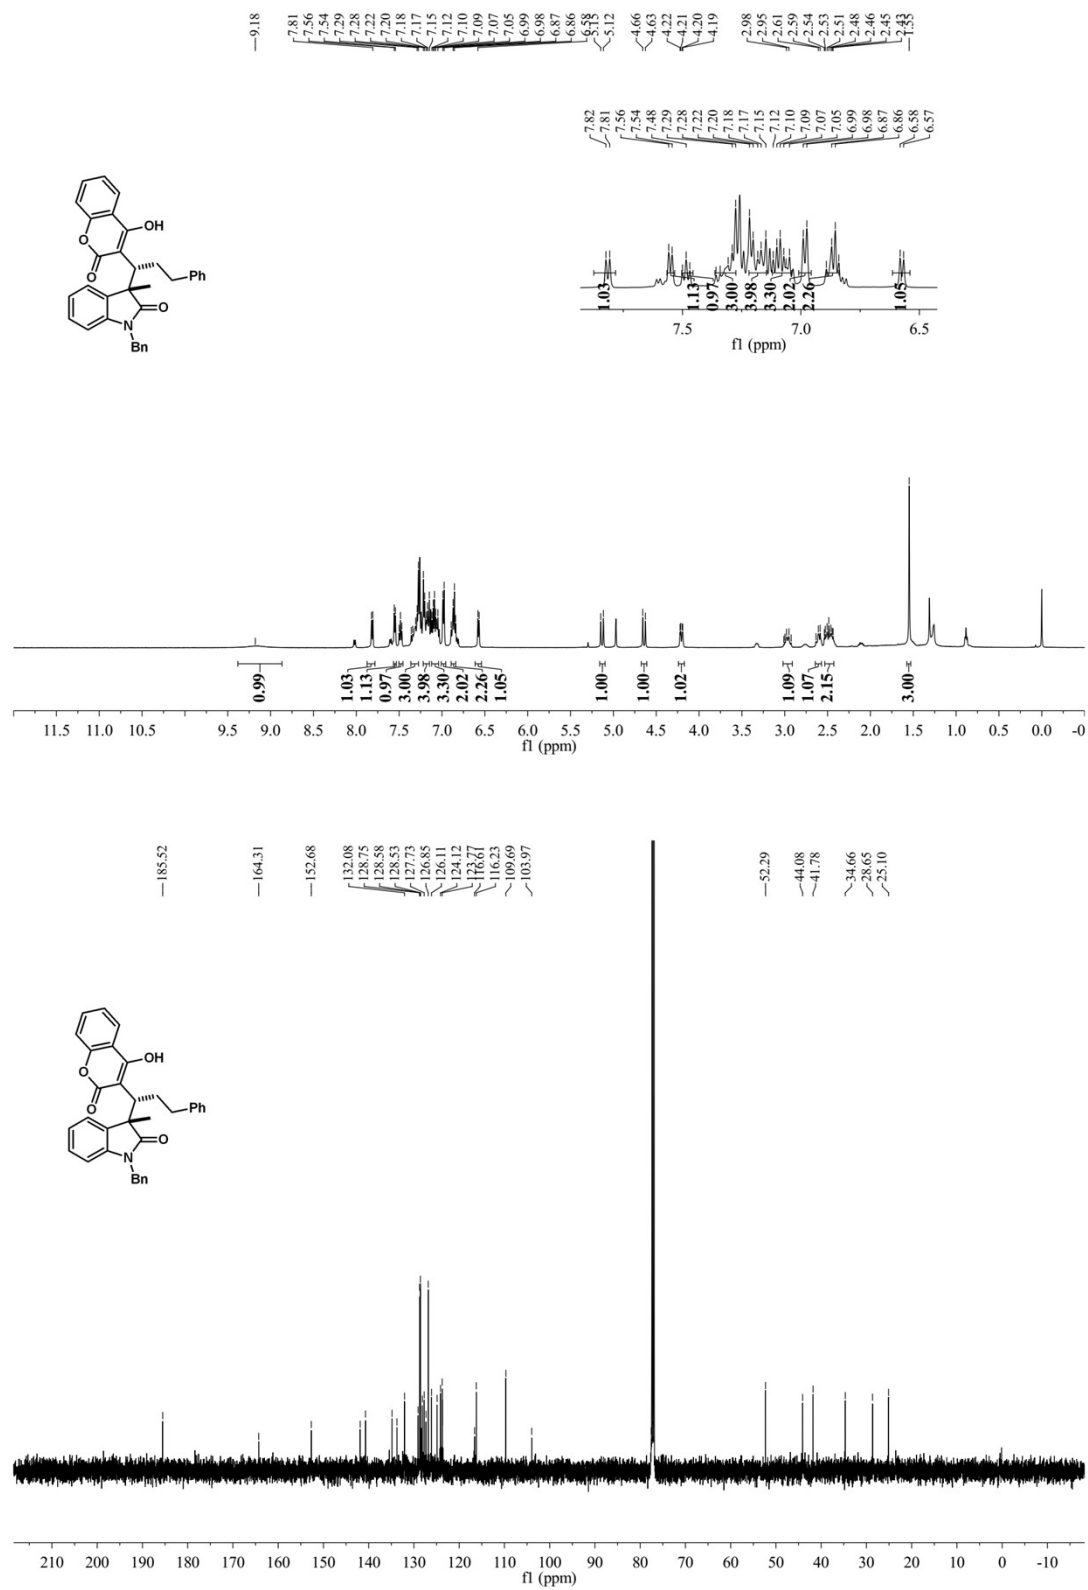

**<sup>1</sup>H NMR (400 MHz, DMSO) and <sup>13</sup>C NMR (100 MHz, DMSO) spectra for 9**

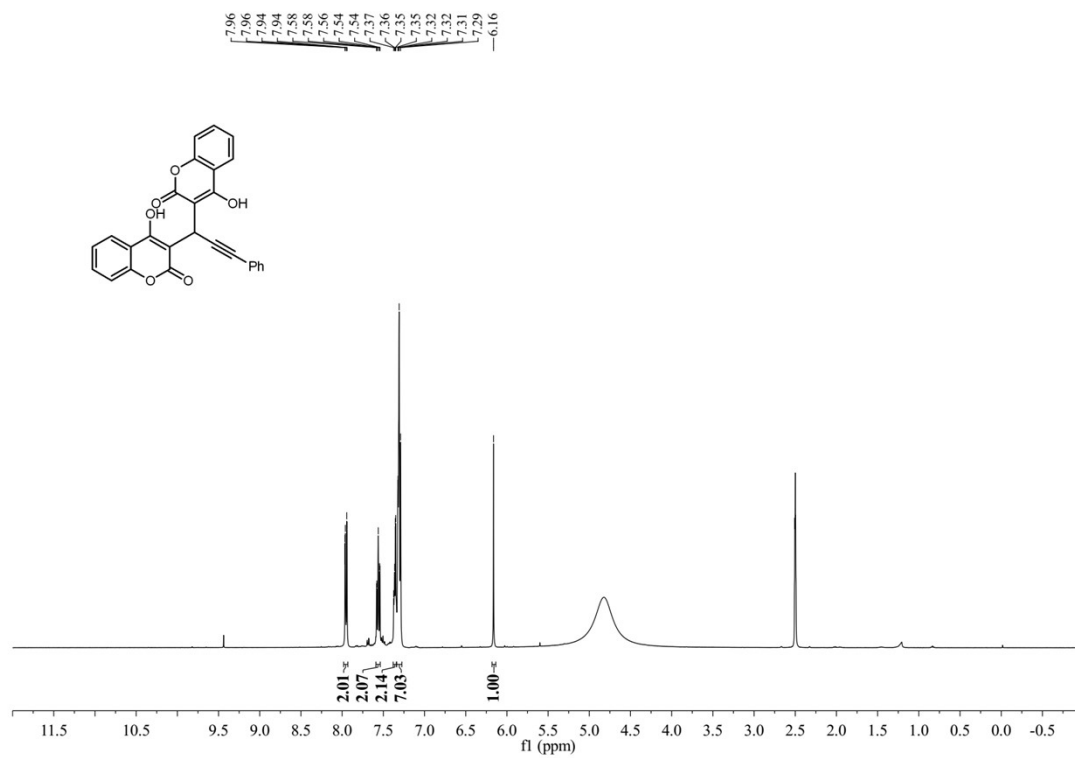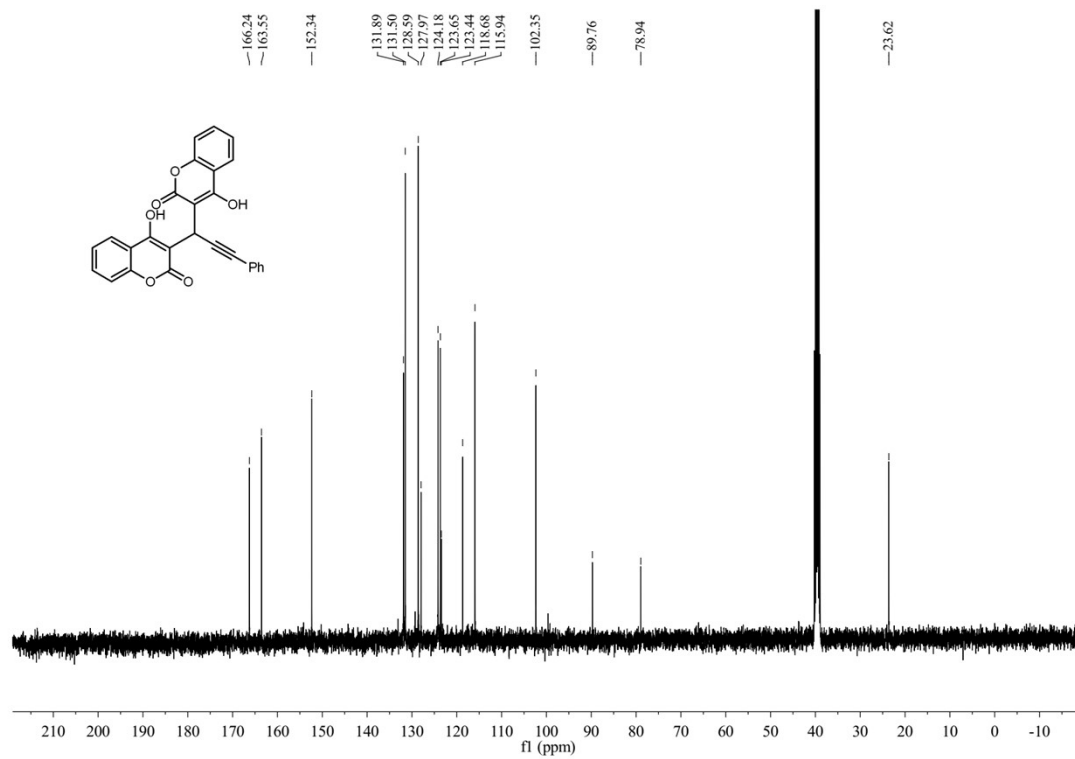

Supplement: d3sc03452f1.pdf [file d3sc03452f1.pdf]
